# Supplementary material for: The global burden of falls: global, regional and national estimates of morbidity and mortality from the Global Burden of Disease Study 2017
Source: PubMed Central journal article supplement (PMC7571347; doi:10.1136/injuryprev-2019-043286), 2020-01-15
Supplement: injuryprev-2019-043286supp003.pdf [file injuryprev-2019-043286supp003.pdf]

| Location              | Incidence (95% UI)                    |                                         |                                                                   | Prevalence (95% UI)                   |                                         |                                                                   |
|-----------------------|---------------------------------------|-----------------------------------------|-------------------------------------------------------------------|---------------------------------------|-----------------------------------------|-------------------------------------------------------------------|
|                       | 2017 counts                           | 2017 age-standardised rates per 100,000 | Percentage change in age-standardised rates between 1990 and 2017 | 2017 counts                           | 2017 age-standardised rates per 100,000 | Percentage change in age-standardised rates between 1990 and 2017 |
| Niger                 | 216 174<br>(176 516 to 268 586)       | 1 248<br>(1 081 to 1 452)               | -5.5<br>(-11.6 to -1.0)                                           | 331 276<br>(288 335 to 378 987)       | 2 805<br>(2 485 to 3 159)               | -5.1<br>(-7.0 to -3.1)                                            |
| Nigeria               | 2 309 653<br>(1 926 332 to 2 758 290) | 1 370<br>(1 183 to 1 576)               | -5.9<br>(-12.0 to -0.1)                                           | 3 751 042<br>(3 287 478 to 4 287 688) | 2 937<br>(2 604 to 3 310)               | -7.2<br>(-8.9 to -5.4)                                            |
| Sao Tome and Principe | 3 436<br>(3 000 to 3 979)             | 1 975<br>(1 755 to 2 234)               | -1.4<br>(-7.1 to 4.9)                                             | 6 000<br>(5 300 to 6 800)             | 4 192<br>(3 724 to 4 736)               | -6.3<br>(-8.5 to -4.0)                                            |
| Senegal               | 166 558<br>(139 141 to 197 758)       | 1 331<br>(1 155 to 1 532)               | -6.9<br>(-12.4 to -0.5)                                           | 290 933<br>(255 447 to 329 724)       | 2 917<br>(2 597 to 3 276)               | -7.1<br>(-8.6 to -5.5)                                            |
| Sierra Leone          | 83 184<br>(69 008 to 99 780)          | 1 258<br>(1 086 to 1 447)               | -5.6<br>(-11.5 to -0.2)                                           | 142 636<br>(124 135 to 162 832)       | 2 772<br>(2 449 to 3 129)               | -5.8<br>(-7.6 to -4.1)                                            |
| Togo                  | 81 738<br>(67 864 to 98 041)          | 1 256<br>(1 088 to 1 452)               | -5.8<br>(-11.7 to -0.1)                                           | 144 156<br>(125 451 to 164 284)       | 2 754<br>(2 438 to 3 094)               | -5.0<br>(-6.8 to -3.0)                                            |
