# Supplementary material for: The global burden of falls: global, regional and national estimates of morbidity and mortality from the Global Burden of Disease Study 2017
Source: HighWire-hosted journal article supplement (doi:10.1136/injuryprev-2019-043286), 2020-01-15
Supplement: injuryprev-2019-043286supp003_data_supplement.pdf [file injuryprev-2019-043286supp003_data_supplement.pdf]

| Location                           | Incidence (95% UI)                                     |                                         |                                                                   | Prevalence (95% UI)                                    |                                          |                                                                   |
|------------------------------------|--------------------------------------------------------|-----------------------------------------|-------------------------------------------------------------------|--------------------------------------------------------|------------------------------------------|-------------------------------------------------------------------|
|                                    | 2017 counts                                            | 2017 age-standardised rates per 100,000 | Percentage change in age-standardised rates between 1990 and 2017 | 2017 counts                                            | 2017 age-standardised rates per 100,000  | Percentage change in age-standardised rates between 1990 and 2017 |
| Uruguay                            | 128 808<br>(114 320 to 145 427)                        | 3 369<br>(2 944 to 3 838)               | 3.5<br>(-1.8 to 9.5)                                              | 300 649<br>(267 360 to 340 315)                        | 7 004<br>(6 155 to 7 964)                | 0.7<br>(-0.9 to 2.4)                                              |
| <b>Western Europe</b>              | <b>21 483 909</b><br><b>(19 383 395 to 24 007 380)</b> | <b>4 267</b><br><b>(3 704 to 4 935)</b> | <b>-2.3</b><br><b>(-6.1 to 1.5)</b>                               | <b>55 637 159</b><br><b>(49 150 798 to 63 388 923)</b> | <b>9 142</b><br><b>(7 914 to 10 580)</b> | <b>-1.0</b><br><b>(-1.7 to -0.3)</b>                              |
| Andorra                            | 3 866<br>(3 443 to 4 350)                              | 4 572<br>(3 965 to 5 256)               | 1.0<br>(-4.2 to 6.3)                                              | 10 590<br>(9 305 to 12 081)                            | 9 820<br>(8 507 to 11 333)               | 0.7<br>(-0.8 to 2.3)                                              |
| Austria                            | 461 202<br>(415 458 to 514 214)                        | 4 583<br>(3 996 to 5 298)               | -17.1<br>(-22.9 to -11.2)                                         | 1 202 772<br>(1 064 392 to 1 370 161)                  | 9 745<br>(8 420 to 11 288)               | -14.2<br>(-16.0 to -12.5)                                         |
| Belgium                            | 738 406<br>(660 137 to 830 740)                        | 5 378<br>(4 689 to 6 166)               | 14.9<br>(8.5 to 22.1)                                             | 1 784 786<br>(1 583 131 to 2 027 425)                  | 11 191<br>(9 723 to 12 923)              | 12.7<br>(11.1 to 14.5)                                            |
| Cyprus                             | 51 237<br>(45 147 to 58 060)                           | 4 176<br>(3 594 to 4 862)               | -0.3<br>(-5.0 to 5.1)                                             | 142 633<br>(123 796 to 163 843)                        | 9 203<br>(7 900 to 10 664)               | 0.5<br>(-1.1 to 2.0)                                              |
| Denmark                            | 275 778<br>(243 153 to 312 177)                        | 4 346<br>(3 729 to 5 072)               | -8.0<br>(-14.3 to -1.4)                                           | 714 858<br>(625 618 to 819 450)                        | 9 312<br>(7 996 to 10 829)               | 0.8<br>(-1.2 to 2.7)                                              |
| Finland                            | 369 102<br>(331 439 to 415 951)                        | 5 435<br>(4 769 to 6 269)               | 5.4<br>(-0.8 to 12.7)                                             | 903 704<br>(805 416 to 1 020 509)                      | 11 297<br>(9 869 to 13 082)              | 7.9<br>(6.3 to 9.4)                                               |
| France                             | 3 776 416<br>(3 382 461 to 4 212 943)                  | 4 619<br>(4 013 to 5 327)               | 8.4<br>(-13.3 to -2.8)                                            | 9 019 607<br>(8 009 442 to 10 268 965)                 | 9 718<br>(8 426 to 11 223)               | 4.9<br>(-6.3 to -3.5)                                             |
| Germany                            | 4 435 165<br>(3 996 472 to 4 949 163)                  | 4 447<br>(3 852 to 5 147)               | -0.3<br>(-6.3 to 5.8)                                             | 11 574 449<br>(10 236 811 to 13 190 387)               | 9 468<br>(8 195 to 10 131)               | 1.2<br>(-0.2 to 2.9)                                              |
| Greece                             | 416 500<br>(372 994 to 465 633)                        | 3 861<br>(3 281 to 4 522)               | -6.8<br>(-12.1 to -2.2)                                           | 1 284 041<br>(1 126 871 to 1 470 521)                  | 8 752<br>(7 510 to 10 155)               | -5.3<br>(-6.9 to -3.8)                                            |
| Iceland                            | 15 635<br>(13 869 to 17 665)                           | 4 378<br>(3 786 to 5 075)               | 3.3<br>(-1.7 to 2.8)                                              | 39 418<br>(34 439 to 45 300)                           | 9 493<br>(8 185 to 11 006)               | 5.5<br>(2.0 to 5.3)                                               |
| Ireland                            | 207 341<br>(183 484 to 235 879)                        | 4 231<br>(3 656 to 4 928)               | 2.8<br>(-2.0 to 7.5)                                              | 539 897<br>(470 349 to 623 617)                        | 9 322<br>(8 053 to 10 887)               | 4.1<br>(2.1 to 6.1)                                               |
| Israel                             | 368 373<br>(316 292 to 430 370)                        | 4 015<br>(3 419 to 4 710)               | 10.1<br>(4.2 to 15.8)                                             | 865 519<br>(744 674 to 1 003 947)                      | 9 048<br>(7 736 to 10 554)               | 10.8<br>(8.0 to 13.1)                                             |
| Italy                              | 2 841 180<br>(2 553 045 to 3 170 734)                  | 3 802<br>(3 331 to 4 382)               | -15.4<br>(-10.5 to -5.3)                                          | 7 461 482<br>(6 645 747 to 8 466 579)                  | 8 111<br>(7 054 to 9 331)                | -9.2<br>(-11.0 to -7.4)                                           |
| Luxembourg                         | 30 368<br>(27 401 to 34 096)                           | 4 707<br>(4 101 to 5 407)               | 8.9<br>(-14.6 to -2.7)                                            | 75 168<br>(66 190 to 85 833)                           | 9 811<br>(8 518 to 11 307)               | -9.2<br>(-10.7 to -7.6)                                           |
| Malta                              | 23 160<br>(20 873 to 25 814)                           | 5 007<br>(4 347 to 5 720)               | -12.1<br>(6.0 to 18.4)                                            | 63 947<br>(56 382 to 73 093)                           | 10 794<br>(9 349 to 12 567)              | 12.3<br>(9.9 to 14.3)                                             |
| Netherlands                        | 721 872<br>(659 797 to 793 950)                        | 3 676<br>(3 223 to 4 125)               | 4.1<br>(-4.2 to 13.2)                                             | 1 765 054<br>(1 573 989 to 2 000 060)                  | 7 565<br>(6 616 to 8 739)                | 1.5<br>(-1.3 to 4.1)                                              |
| Norway                             | 299 873<br>(259 974 to 339 786)                        | 4 995<br>(4 301 to 5 752)               | -1.6<br>(-5.2 to 1.7)                                             | 749 990<br>(659 212 to 859 692)                        | 10 815<br>(9 321 to 12 589)              | -0.9<br>(-2.2 to 0.1)                                             |
| Portugal                           | 371 169<br>(320 725 to 415 610)                        | 3 112<br>(2 695 to 3 627)               | 27.4<br>(33.0 to 21.1)                                            | 1 054 998<br>(934 591 to 1 201 872)                    | 6 810<br>(5 909 to 7 857)                | -29.7<br>(-31.5 to -27.7)                                         |
| Spain                              | 1 922 262<br>(1 716 547 to 2 154 504)                  | 3 826<br>(3 281 to 4 475)               | -1.1<br>(-6.2 to 4.5)                                             | 5 498 483<br>(4 826 112 to 6 271 470)                  | 8 497<br>(7 306 to 9 828)                | -1.1<br>(-2.6 to 0.3)                                             |
| Sweden                             | 539 643<br>(466 549 to 614 803)                        | 4 634<br>(3 976 to 5 367)               | 11.7<br>(7.6 to 15.9)                                             | 1 432 049<br>(1 256 323 to 1 647 133)                  | 10 367<br>(8 882 to 10 294)              | 11.9<br>(10.1 to 13.9)                                            |
| Switzerland                        | 497 728<br>(458 772 to 547 216)                        | 4 594<br>(4 167 to 5 142)               | -26.6<br>(-31.8 to -20.1)                                         | 1 154 454<br>(1 035 156 to 1 300 314)                  | 9 217<br>(8 117 to 10 476)               | -27.3<br>(-29.2 to -25.2)                                         |
| United Kingdom                     | 3 095 384<br>(2 704 973 to 3 500 866)                  | 4 290<br>(3 678 to 4 985)               | 14.4<br>(10.8 to 17.9)                                            | 9 241 612<br>(7 720 907 to 9 439 086)                  | 9 419<br>(8 109 to 10 926)               | 15.2<br>(13.8 to 16.9)                                            |
| <b>Latin America and Caribbean</b> | <b>11 776 802</b><br><b>(10 571 218 to 13 159 361)</b> | <b>2 059</b><br><b>(1 843 to 2 297)</b> | <b>29.6</b><br><b>(26.4 to 32.8)</b>                              | <b>25 073 723</b><br><b>(22 386 743 to 28 287 435)</b> | <b>4 286</b><br><b>(3 837 to 4 840)</b>  | <b>29.5</b><br><b>(27.5 to 31.9)</b>                              |
| <b>Andean Latin America</b>        | <b>975 728</b><br><b>(855 995 to 1 111 401)</b>        | <b>1 642</b><br><b>(1 446 to 1 868)</b> | <b>25.7</b><br><b>(19.0 to 31.7)</b>                              | <b>1 984 980</b><br><b>(1 770 537 to 2 236 342)</b>    | <b>3 444</b><br><b>(3 083 to 3 878)</b>  | <b>23.2</b><br><b>(20.8 to 26.5)</b>                              |
| Bolivia                            | 167 244<br>(145 638 to 192 298)                        | 1 588<br>(1 402 to 1 799)               | 16.6<br>(9.4 to 23.9)                                             | 324 413<br>(288 205 to 364 319)                        | 3 304<br>(2 955 to 3 699)                | 15.2<br>(16.6 to 18.3)                                            |
| Ecuador                            | 302 697<br>(267 916 to 343 348)                        | 1 885<br>(1 674 to 2 130)               | 14.3<br>(6.1 to 23.3)                                             | 610 719<br>(548 029 to 688 230)                        | 3 885<br>(3 497 to 4 371)                | 11.3<br>(8.9 to 14.1)                                             |
| Peru                               | 505 793<br>(441 152 to 576 364)                        | 1 548<br>(1 351 to 1 763)               | 36.3<br>(29.0 to 43.9)                                            | 1 049 848<br>(934 637 to 1 188 225)                    | 3 277<br>(2 924 to 3 712)                | 33.1<br>(29.7 to 37.8)                                            |
| <b>Caribbean</b>                   | <b>823 052</b><br><b>(731 226 to 928 599)</b>          | <b>1 716</b><br><b>(1 520 to 1 940)</b> | <b>30.0</b><br><b>(24.5 to 36.3)</b>                              | <b>1 707 204</b><br><b>(1 528 010 to 1 923 194)</b>    | <b>3 441</b><br><b>(3 077 to 3 885)</b>  | <b>30.0</b><br><b>(27.4 to 33.3)</b>                              |
| Antigua and Barbuda                | 1 293<br>(1 114 to 1 493)                              | 1 430<br>(1 238 to 1 655)               | 42.2<br>(36.2 to 48.7)                                            | 2 985<br>(2 641 to 3 371)                              | 3 007<br>(2 658 to 3 400)                | 39.7<br>(35.5 to 43.8)                                            |
| The Bahamas                        | 5 595<br>(4 897 to 6 403)                              | 1 537<br>(1 352 to 1 757)               | 30.7<br>(24.4 to 36.4)                                            | 12 017<br>(10 665 to 13 559)                           | 3 099<br>(2 762 to 3 504)                | 31.0<br>(27.2 to 35.2)                                            |
| Barbados                           | 4 873<br>(4 249 to 5 634)                              | 1 457<br>(1 263 to 1 685)               | 39.7<br>(33.8 to 46.6)                                            | 11 917<br>(10 644 to 13 429)                           | 3 033<br>(2 683 to 3 417)                | 38.5<br>(34.3 to 42.6)                                            |
| Belize                             | 5 352<br>(4 592 to 6 193)                              | 1 508<br>(1 326 to 1 711)               | 50.8<br>(41.2 to 53.4)                                            | 10 442<br>(9 210 to 11 888)                            | 3 174<br>(2 828 to 3 572)                | 46.9<br>(42.7 to 52.1)                                            |
| Bermuda                            | 2 299<br>(1 140 to 1 494)                              | 1 582<br>(1 381 to 1 818)               | 25.3<br>(19.3 to 31.4)                                            | 3 135<br>(2 801 to 3 560)                              | 3 217<br>(2 868 to 3 645)                | 26.4<br>(23.0 to 30.1)                                            |
| Cuba                               | 315 328<br>(283 323 to 351 233)                        | 2 130<br>(1 907 to 2 402)               | 27.8<br>(20.5 to 36.5)                                            | 625 959<br>(562 627 to 704 614)                        | 3 886<br>(3 487 to 4 378)                | 25.9<br>(22.5 to 29.3)                                            |
| Dominica                           | 1 062<br>(935 to 1 215)                                | 1 435<br>(1 251 to 1 649)               | 48.0<br>(42.2 to 54.7)                                            | 2 506<br>(2 234 to 2 831)                              | 3 072<br>(2 729 to 3 472)                | 47.1<br>(42.8 to 52.2)                                            |
| Dominican Republic                 | 146 235<br>(125 939 to 168 242)                        | 1 453<br>(1 259 to 1 673)               | 50.0<br>(43.2 to 57.1)                                            | 311 474<br>(274 376 to 353 721)                        | 3 115<br>(2 754 to 3 534)                | 44.4<br>(39.6 to 49.9)                                            |
| Grenada                            | 1 881<br>(1 662 to 2 132)                              | 1 535<br>(1 342 to 1 749)               | 37.3<br>(30.4 to 43.9)                                            | 4 271<br>(3 822 to 4 821)                              | 3 215<br>(2 871 to 3 624)                | 38.0<br>(33.5 to 42.3)                                            |
| Guyana                             | 11 312<br>(9 939 to 12 961)                            | 1 642<br>(1 452 to 1 866)               | 37.5<br>(30.1 to 44.8)                                            | 22 743<br>(20 250 to 25 523)                           | 3 363<br>(3 008 to 3 766)                | 36.8<br>(32.4 to 41.1)                                            |
| Haiti                              | 128 573<br>(109 188 to 150 412)                        | 1 285<br>(1 119 to 1 474)               | 30.2<br>(23.2 to 37.2)                                            | 245 488<br>(215 380 to 277 676)                        | 2 707<br>(2 414 to 3 025)                | 29.7<br>(26.2 to 33.3)                                            |
| Jamaica                            | 40 860<br>(35 361 to 47 156)                           | 1 475<br>(1 271 to 1 700)               | 46.0<br>(40.3 to 51.7)                                            | 94 065<br>(83 351 to 106 483)                          | 3 219<br>(2 847 to 3 648)                | 43.3<br>(38.9 to 48.6)                                            |
| Puerto Rico                        | 91 170<br>(81 236 to 102 808)                          | 1 940<br>(1 700 to 2 212)               | 35.9<br>(28.4 to 44.5)                                            | 210 801<br>(188 473 to 238 359)                        | 3 842<br>(3 426 to 4 333)                | 34.8<br>(31.4 to 38.7)                                            |
| Saint Lucia                        | 2 562<br>(2 233 to 2 928)                              | 1 418<br>(1 235 to 1 625)               | 38.1<br>(32.5 to 44.5)                                            | 5 987<br>(5 332 to 6 742)                              | 3 009<br>(2 672 to 3 395)                | 38.3<br>(34.3 to 43.0)                                            |
| Saint Vincent and the Grenadines   | 1 938<br>(1 718 to 2 183)                              | 1 610<br>(1 423 to 1 826)               | 51.6<br>(44.6 to 58.1)                                            | 4 350<br>(3 888 to 4 892)                              | 3 384<br>(3 016 to 3 802)                | 51.1<br>(45.8 to 56.0)                                            |
| Suriname                           | 8 965<br>(7 832 to 10 247)                             | 1 587<br>(1 390 to 1 806)               | 42.2<br>(35.0 to 49.9)                                            | 18 863<br>(16 795 to 21 246)                           | 3 231<br>(2 882 to 3 628)                | 40.5<br>(36.5 to 45.4)                                            |
| Trinidad and Tobago                | 23 013<br>(20 156 to 26 218)                           | 1 569<br>(1 367 to 1 785)               | 26.1<br>(19.1 to 33.6)                                            | 54 029<br>(48 180 to 60 799)                           | 3 291<br>(2 933 to 3 699)                | 27.6<br>(24.4 to 31.8)                                            |
| Virgin Islands                     | 2 144<br>(1 889 to 2 437)                              | 1 690<br>(1 482 to 1 926)               | 37.2<br>(31.3 to 43.6)                                            | 4 781<br>(4 253 to 5 437)                              | 3 262<br>(2 908 to 3 696)                | 32.6<br>(28.6 to 36.4)                                            |
| <b>Central Latin America</b>       | <b>4 365 274</b><br><b>(3 891 450 to 4 938 440)</b>    | <b>1 810</b><br><b>(1 614 to 2 044)</b> | <b>10.9</b><br><b>(7.1 to 15.0)</b>                               | <b>8 704 856</b><br><b>(7 732 689 to 9 912 609)</b>    | <b>3 576</b><br><b>(3 182 to 4 074)</b>  | <b>9.9</b><br><b>(8.0 to 12.4)</b>                                |
| Colombia                           | 639 271<br>(563 674 to 733 681)                        | 1 261<br>(1 105 to 1 448)               | -8.0<br>(-15.1 to -0.7)                                           | 1 345 985<br>(1 194 928 to 1 530 954)                  | 2 544<br>(2 233 to 2 901)                | -6.2<br>(-8.6 to -3.9)                                            |
| Costa Rica                         | 73 314<br>(65 346 to 82 701)                           | 1 586<br>(1 406 to 1 802)               | 8.6<br>(1.8 to 15.8)                                              | 145 159<br>(129 533 to 163 783)                        | 2 958<br>(2 635 to 3 348)                | 13.2<br>(10.7 to 16.4)                                            |
| El Salvador                        | 91 859<br>(81 906 to 103 738)                          | 1 580<br>(1 406 to 1 789)               | 24.9<br>(16.5 to 34.1)                                            | 171 514<br>(152 981 to 194 992)                        | 2 902<br>(2 591 to 3 291)                | 17.1<br>(14.1 to 20.1)                                            |
| Guatemala                          | 208 164<br>(180 559 to 240 469)                        | 1 461<br>(1 292 to 1 657)               | 8.2<br>(1.8 to 15.3)                                              | 382 640<br>(335 380 to 439 929)                        | 2 862<br>(2 556 to 3 250)                | 6.9<br>(4.5 to 10.0)                                              |
| Honduras                           | 100 651<br>(86 007 to 118 499)                         | 1 193<br>(1 046 to 1 376)               | 29.3<br>(22.2 to 36.4)                                            | 190 567<br>(165 038 to 221 735)                        | 2 497<br>(2 195 to 2 843)                | 23.2<br>(19.8 to 27.0)                                            |
| Mexico                             | 2 697 567<br>(2 389 537 to 3 043 225)                  | 2 276<br>(2 016 to 2 566)               | 20.2<br>(15.8 to 24.9)                                            | 5 357 266<br>(4 779 128 to 6 112 974)                  | 4 482<br>(4 002 to 5 130)                | 17.6<br>(15.1 to 21.1)                                            |
| Nicaragua                          | 73 151<br>(63 266 to 85 697)                           | 1 300<br>(1 141 to 1 497)               | 17.1<br>(10.7 to 24.2)                                            | 137 756<br>(120 960 to 157 881)                        | 2 537<br>(2 251 to 2 872)                | 16.6<br>(13.4 to 19.8)                                            |

| Location                                      | Incidence (95% UI)                               |                                         |                                                                   | Prevalence (95% UI)                              |                                         |                                                                   |
|-----------------------------------------------|--------------------------------------------------|-----------------------------------------|-------------------------------------------------------------------|--------------------------------------------------|-----------------------------------------|-------------------------------------------------------------------|
|                                               | 2017 counts                                      | 2017 age-standardised rates per 100,000 | Percentage change in age-standardised rates between 1990 and 2017 | 2017 counts                                      | 2017 age-standardised rates per 100,000 | Percentage change in age-standardised rates between 1990 and 2017 |
| Panama                                        | 53 715<br>(47 145 to 60 506)                     | 1 359<br>(1 201 to 1 549)               | 13.6<br>(7.3 to 20.4)                                             | 107 674<br>(95 861 to 121 838)                   | 2 706<br>(2 405 to 3 064)               | 16.1<br>(13.0 to 19.4)                                            |
| Venezuela                                     | 428 082<br>(375 802 to 486 515)                  | 1 497<br>(1 318 to 1 707)               | 0.5<br>(-6.1 to 7.8)                                              | 866 296<br>(764 916 to 993 630)                  | 2 929<br>(2 596 to 3 336)               | 2.3<br>(-0.5 to 5.3)                                              |
| <b>Tropical Latin America</b>                 | <b>5 612 748<br/>(5 035 668 to 6 288 061)</b>    | <b>2 522<br/>(2 266 to 2 814)</b>       | <b>48.7<br/>(44.6 to 52.8)</b>                                    | <b>12 676 683<br/>(11 247 927 to 14 408 324)</b> | <b>5 402<br/>(4 803 to 6 117)</b>       | <b>48.0<br/>(44.5 to 51.8)</b>                                    |
| Brazil                                        | 5 480 139<br>(4 920 456 to 6 134 580)            | 2 536<br>(2 280 to 2 826)               | 49.2<br>(45.1 to 53.5)                                            | 12 412 805<br>(11 011 375 to 14 113 681)         | 5 430<br>(4 827 to 6 149)               | 48.6<br>(45.0 to 52.4)                                            |
| Paraguay                                      | 132 608<br>(113 800 to 152 872)                  | 2 032<br>(1 776 to 2 311)               | 28.0<br>(21.8 to 33.9)                                            | 263 875<br>(232 752 to 298 429)                  | 4 287<br>(3 805 to 4 829)               | 20.6<br>(17.6 to 23.8)                                            |
| <b>North Africa and Middle East</b>           | <b>9 084 601<br/>(7 746 853 to 10 562 639)</b>   | <b>1 562<br/>(1 349 to 1 793)</b>       | <b>3.2<br/>(-1.5 to 7.5)</b>                                      | <b>19 413 992<br/>(16 874 777 to 22 281 107)</b> | <b>3 582<br/>(3 144 to 4 081)</b>       | <b>-0.1<br/>(-1.5 to 1.6)</b>                                     |
| <b>North Africa and Middle East</b>           | <b>9 084 601<br/>(7 746 853 to 10 562 639)</b>   | <b>1 562<br/>(1 349 to 1 793)</b>       | <b>3.2<br/>(-1.5 to 7.5)</b>                                      | <b>19 413 992<br/>(16 874 777 to 22 281 107)</b> | <b>3 582<br/>(3 144 to 4 081)</b>       | <b>-0.1<br/>(-1.5 to 1.6)</b>                                     |
| Afghanistan                                   | 503 769<br>(423 506 to 595 609)                  | 1 528<br>(1 334 to 1 740)               | -0.9<br>(-5.7 to 4.0)                                             | 803 232<br>(687 686 to 939 871)                  | 3 634<br>(3 203 to 4 134)               | -2.2<br>(-4.4 to 0.3)                                             |
| Algeria                                       | 591 550<br>(508 284 to 679 527)                  | 1 504<br>(1 301 to 1 743)               | -2.5<br>(-8.2 to 3.1)                                             | 1 351 184<br>(1 176 579 to 1 553 355)            | 3 486<br>(3 049 to 3 982)               | 4.3<br>(-6.5 to -1.9)                                             |
| Bahrain                                       | 21 480<br>(18 176 to 25 283)                     | 1 558<br>(1 317 to 1 838)               | 9.4<br>(3.7 to 15.5)                                              | 58 143<br>(49 952 to 67 491)                     | 3 711<br>(3 217 to 4 280)               | 9.4<br>(6.0 to 12.8)                                              |
| Egypt                                         | 1 323 510<br>(1 115 031 to 1 559 706)            | 1 410<br>(1 215 to 1 627)               | 8.8<br>(2.7 to 14.7)                                              | 2 647 936<br>(2 288 725 to 3 056 336)            | 3 249<br>(2 844 to 3 701)               | 4.1<br>(1.3 to 6.9)                                               |
| Iran                                          | 1 344 586<br>(1 151 472 to 1 567 885)            | 1 701<br>(1 462 to 1 976)               | 7.9<br>(3.4 to 12.4)                                              | 3 229 617<br>(2 806 087 to 3 697 598)            | 3 899<br>(3 411 to 4 454)               | 5.1<br>(3.6 to 6.9)                                               |
| Iraq                                          | 626 536<br>(512 072 to 759 959)                  | 1 378<br>(1 153 to 1 631)               | 14.2<br>(5.7 to 22.8)                                             | 1 218 473<br>(1 040 997 to 1 424 301)            | 3 437<br>(2 979 to 3 958)               | 19.4<br>(14.9 to 24.4)                                            |
| Jordan                                        | 147 491<br>(122 800 to 175 900)                  | 1 384<br>(1 183 to 1 618)               | 1.7<br>(-5.1 to 8.0)                                              | 293 031<br>(250 836 to 341 424)                  | 3 230<br>(2 805 to 3 700)               | -0.8<br>(-3.5 to 2.2)                                             |
| Kuwait                                        | 74 673<br>(64 300 to 86 138)                     | 1 815<br>(1 570 to 2 110)               | -4.9<br>(-10.3 to 0.5)                                            | 180 593<br>(156 081 to 207 999)                  | 4 251<br>(3 720 to 4 860)               | -4.9<br>(-7.3 to -2.3)                                            |
| Lebanon                                       | 134 232<br>(113 643 to 158 436)                  | 1 631<br>(1 407 to 1 906)               | 8.9<br>(2.7 to 15.0)                                              | 3 275 078<br>(2 343 315 to 3 17 558)             | 3 574<br>(3 109 to 4 104)               | 9.1<br>(5.8 to 13.0)                                              |
| Libya                                         | 107 284<br>(91 898 to 123 652)                   | 1 615<br>(1 400 to 1 844)               | -6.0<br>(-11.6 to -0.6)                                           | 230 536<br>(200 236 to 265 410)                  | 3 622<br>(3 175 to 4 132)               | -7.6<br>(-9.6 to -5.6)                                            |
| Morocco                                       | 487 872<br>(417 555 to 570 750)                  | 1 408<br>(1 210 to 1 636)               | 8.7<br>(2.2 to 14.5)                                              | 1 149 026<br>(999 534 to 1 314 358)              | 3 275<br>(2 861 to 3 725)               | 5.5<br>(3.3 to 7.8)                                               |
| Palestine                                     | 70 758<br>(58 259 to 85 605)                     | 1 431<br>(1 224 to 1 672)               | 3.7<br>(-2.6 to 10.1)                                             | 130 092<br>(112 403 to 150 085)                  | 3 397<br>(2 969 to 3 871)               | 3.8<br>(1.8 to 5.9)                                               |
| Oman                                          | 66 261<br>(55 336 to 80 190)                     | 1 582<br>(1 362 to 1 849)               | -5.3<br>(-0.5 to 11.3)                                            | 148 726<br>(126 285 to 174 723)                  | 3 574<br>(3 109 to 4 112)               | 5.4<br>(2.7 to 8.1)                                               |
| Qatar                                         | 54 445<br>(45 831 to 64 277)                     | 2 011<br>(1 744 to 2 313)               | -3.2<br>(-9.8 to 4.0)                                             | 125 405<br>(106 851 to 146 810)                  | 4 603<br>(4 029 to 5 271)               | -3.5<br>(-6.1 to -0.1)                                            |
| Saudi Arabia                                  | 695 984<br>(606 109 to 802 551)                  | 2 191<br>(1 922 to 2 493)               | -6.4<br>(-11.4 to -1.0)                                           | 1 412 818<br>(1 232 967 to 1 613 742)            | 4 688<br>(4 161 to 5 312)               | -8.6<br>(-10.5 to -6.9)                                           |
| Sudan                                         | 527 474<br>(439 000 to 639 987)                  | 1 303<br>(1 121 to 1 509)               | 8.9<br>(3.2 to 14.5)                                              | 945 064<br>(817 590 to 1 105 440)                | 3 198<br>(2 802 to 3 670)               | 7.7<br>(5.0 to 10.7)                                              |
| Syria                                         | 259 893<br>(213 922 to 316 693)                  | 1 404<br>(1 177 to 1 651)               | 23.4<br>(16.6 to 30.4)                                            | 545 105<br>(464 701 to 630 683)                  | 3 328<br>(2 880 to 3 833)               | 20.8<br>(16.7 to 25.1)                                            |
| Tunisia                                       | 163 409<br>(140 390 to 189 712)                  | 1 474<br>(1 256 to 1 722)               | 4.7<br>(2.8 to 15.0)                                              | 413 032<br>(359 236 to 473 833)                  | 3 377<br>(2 932 to 3 881)               | 4.6<br>(1.8 to 7.4)                                               |
| Turkey                                        | 1 276 654<br>(1 112 675 to 1 452 784)            | 1 610<br>(1 393 to 1 859)               | -11.6<br>(-17.3 to -5.0)                                          | 3 045 977<br>(2 669 478 to 3 499 517)            | 3 515<br>(3 072 to 4 038)               | -17.9<br>(-21.1 to -14.7)                                         |
| United Arab Emirates                          | 191 722<br>(161 644 to 226 252)                  | 2 010<br>(1 743 to 2 313)               | -15.0<br>(-19.3 to -9.5)                                          | 495 721<br>(426 385 to 574 778)                  | 4 616<br>(4 041 to 5 262)               | -16.4<br>(-18.3 to -14.2)                                         |
| Yemen                                         | 405 535<br>(337 920 to 490 550)                  | 1 319<br>(1 157 to 1 546)               | 2.6<br>(-2.4 to 8.4)                                              | 701 073<br>(602 668 to 813 602)                  | 3 177<br>(2 783 to 3 610)               | 1.3<br>(-1.1 to 4.3)                                              |
| <b>South Asia</b>                             | <b>27 645 658<br/>(23 929 866 to 31 790 195)</b> | <b>1 709<br/>(1 495 to 1 959)</b>       | <b>33.4<br/>(27.9 to 38.9)</b>                                    | <b>54 501 408<br/>(48 091 376 to 61 867 360)</b> | <b>3 585<br/>(3 184 to 4 064)</b>       | <b>30.4<br/>(28.2 to 32.9)</b>                                    |
| <b>South Asia</b>                             | <b>27 645 658<br/>(23 929 866 to 31 790 195)</b> | <b>1 709<br/>(1 495 to 1 959)</b>       | <b>33.4<br/>(27.9 to 38.9)</b>                                    | <b>54 501 408<br/>(48 091 376 to 61 867 360)</b> | <b>3 585<br/>(3 184 to 4 064)</b>       | <b>30.4<br/>(28.2 to 32.9)</b>                                    |
| Bangladesh                                    | 1 879 191<br>(1 600 626 to 2 201 983)            | 1 237<br>(1 064 to 1 431)               | 38.8<br>(30.2 to 47.4)                                            | 3 975 599<br>(3 470 320 to 4 541 326)            | 2 801<br>(2 465 to 3 176)               | 42.5<br>(36.9 to 48.5)                                            |
| Bhutan                                        | 13 737<br>(12 000 to 15 729)                     | 1 627<br>(1 439 to 1 836)               | 12.6<br>(6.1 to 19.7)                                             | 26 689<br>(23 565 to 30 111)                     | 3 383<br>(3 020 to 3 804)               | 9.9<br>(7.3 to 12.7)                                              |
| India                                         | 22 618 646<br>(19 574 098 to 26 132 069)         | 1 793<br>(1 567 to 2 059)               | 31.4<br>(25.8 to 37.1)                                            | 44 741 891<br>(39 434 255 to 50 716 561)         | 3 723<br>(3 313 to 4 225)               | 28.0<br>(25.9 to 30.4)                                            |
| Nepal                                         | 349 043<br>(302 584 to 403 990)                  | 1 291<br>(1 136 to 1 468)               | 15.8<br>(8.7 to 23.3)                                             | 677 787<br>(600 780 to 764 528)                  | 2 726<br>(2 435 to 3 064)               | 14.2<br>(11.3 to 17.0)                                            |
| Pakistan                                      | 2 785 040<br>(2 384 681 to 3 254 158)            | 1 475<br>(1 288 to 1 681)               | 44.9<br>(37.3 to 52.4)                                            | 5 079 442<br>(4 444 064 to 5 716 010)            | 3 244<br>(2 879 to 3 654)               | 39.4<br>(35.6 to 43.1)                                            |
| <b>Southeast Asia, East Asia, and Oceania</b> | <b>24 523 775<br/>(21 530 658 to 27 957 854)</b> | <b>1 104<br/>(971 to 1 262)</b>         | <b>85.4<br/>(77.8 to 93.1)</b>                                    | <b>68 124 841<br/>(60 201 836 to 77 289 748)</b> | <b>2 658<br/>(2 375 to 3 036)</b>       | <b>83.2<br/>(75.8 to 91.3)</b>                                    |
| <b>East Asia</b>                              | <b>21 903 706<br/>(19 252 383 to 24 912 373)</b> | <b>1 462<br/>(1 275 to 1 672)</b>       | <b>111.4<br/>(102.8 to 121.3)</b>                                 | <b>62 282 056<br/>(54 985 517 to 70 760 535)</b> | <b>3 375<br/>(2 972 to 3 834)</b>       | <b>99.1<br/>(90.5 to 108.9)</b>                                   |
| China                                         | 21 032 439<br>(18 488 797 to 23 929 008)         | 1 477<br>(1 288 to 1 691)               | 113.2<br>(104.4 to 123.6)                                         | 59 820 373<br>(52 811 012 to 67 990 803)         | 3 411<br>(3 004 to 3 874)               | 100.4<br>(91.6 to 110.4)                                          |
| North Korea                                   | 239 052<br>(206 380 to 274 852)                  | 935<br>(803 to 1 075)                   | 78.5<br>(66.4 to 90.6)                                            | 661 540<br>(578 846 to 755 182)                  | 2 217<br>(1 930 to 2 515)               | 80.9<br>(71.5 to 90.8)                                            |
| Taiwan (Province of China)                    | 279 358<br>(248 092 to 314 981)                  | 1 126<br>(978 to 1 288)                 | 12.6<br>(30.2 to 55.8)                                            | 796 814<br>(706 078 to 903 269)                  | 2 502<br>(2 203 to 2 827)               | 39.3<br>(33.5 to 45.4)                                            |
| <b>Oceania</b>                                | <b>85 737<br/>(73 359 to 101 145)</b>            | <b>708<br/>(616 to 824)</b>             | <b>89.2<br/>(80.1 to 98.9)</b>                                    | <b>164 350<br/>(144 178 to 187 668)</b>          | <b>1 690<br/>(1 498 to 1 916)</b>       | <b>91.9<br/>(83.9 to 101.8)</b>                                   |
| American Samoa                                | 431<br>(366 to 508)                              | 781<br>(672 to 910)                     | 65.8<br>(56.4 to 75.0)                                            | 907<br>(795 to 1 029)                            | 1 797<br>(1 581 to 2 037)               | 64.8<br>(58.6 to 72.1)                                            |
| Federated States of Micronesia                | 708<br>(599 to 839)                              | 692<br>(596 to 806)                     | 91.1<br>(79.5 to 104.4)                                           | 1 477<br>(1 292 to 1 685)                        | 1 637<br>(1 441 to 1 849)               | 92.3<br>(83.5 to 102.5)                                           |
| Fiji                                          | 6 054<br>(5 095 to 7 141)                        | 670<br>(568 to 787)                     | 100.9<br>(89.8 to 113.0)                                          | 13 907<br>(12 174 to 15 879)                     | 1 612<br>(1 416 to 1 830)               | 100.3<br>(89.3 to 112.9)                                          |
| Guam                                          | 1 534<br>(1 334 to 1 783)                        | 907<br>(791 to 1 052)                   | 89.5<br>(80.3 to 100.3)                                           | 3 579<br>(3 165 to 4 029)                        | 2 031<br>(1 795 to 2 290)               | 89.2<br>(80.2 to 98.3)                                            |
| Kiribati                                      | 685<br>(567 to 832)                              | 574<br>(481 to 688)                     | 118.0<br>(104.1 to 134.7)                                         | 1 402<br>(1 223 to 1 598)                        | 1 450<br>(1 274 to 1 647)               | 118.7<br>(105.5 to 133.5)                                         |
| Marshall Islands                              | 385<br>(326 to 452)                              | 702<br>(608 to 813)                     | 99.7<br>(88.6 to 111.1)                                           | 770<br>(675 to 880)                              | 1 653<br>(1 463 to 1 875)               | 100.3<br>(90.5 to 110.2)                                          |
| Northern Mariana Islands                      | 379<br>(323 to 442)                              | 833<br>(717 to 971)                     | 83.3<br>(50.7 to 67.9)                                            | 972<br>(854 to 1 021)                            | 1 873<br>(1 651 to 2 131)               | 58.5<br>(52.4 to 65.0)                                            |
| Papua New Guinea                              | 58 834<br>(50 099 to 69 931)                     | 661<br>(573 to 772)                     | 102.3<br>(90.0 to 115.5)                                          | 109 907<br>(96 082 to 125 691)                   | 1 583<br>(1 400 to 1 802)               | 103.8<br>(93.9 to 116.7)                                          |
| Samoa                                         | 1 438<br>(1 211 to 1 710)                        | 739<br>(632 to 856)                     | 92.7<br>(82.3 to 104.1)                                           | 2 872<br>(2 521 to 3 273)                        | 1 752<br>(1 548 to 1 989)               | 93.1<br>(84.6 to 103.5)                                           |
| Solomon Islands                               | 719<br>(6 839 to 8 769)                          | 704<br>(1 204 to 1 507)                 | 34.0<br>(28.8 to 44.1)                                            | 1 344<br>(12 309 to 15 687)                      | 3 051<br>(2 726 to 3 441)               | 37.6<br>(33.9 to 41.8)                                            |
| Tonga                                         | 719<br>(607 to 860)                              | 704<br>(600 to 827)                     | 89.1<br>(78.8 to 99.5)                                            | 1 526<br>(1 339 to 1 731)                        | 1 678<br>(1 478 to 1 900)               | 93.9<br>(84.2 to 104.3)                                           |
| Vanuatu                                       | 2 126<br>(1 813 to 2 511)                        | 776<br>(673 to 900)                     | 94.3<br>(84.1 to 105.9)                                           | 4 075<br>(3 591 to 4 632)                        | 1 844<br>(1 644 to 2 077)               | 95.1<br>(86.7 to 104.3)                                           |
| <b>Southeast Asia</b>                         | <b>2 534 331<br/>(2 181 508 to 2 958 504)</b>    | <b>988<br/>(844 to 1 463)</b>           | <b>15.0<br/>(10.5 to 20.2)</b>                                    | <b>5 678 435<br/>(5 027 741 to 6 452 084)</b>    | <b>882<br/>(786 to 1 002)</b>           | <b>16.2<br/>(13.9 to 18.6)</b>                                    |
| Cambodia                                      | 770 411<br>(66 794 to 89 252)                    | 573<br>(461 to 598)                     | 116.7<br>(37.1 to 56.8)                                           | 1 125<br>(136 024 to 174 333)                    | 1 125<br>(1 004 to 1 277)               | 45.5<br>(42.3 to 50.8)                                            |
| Indonesia                                     | 652 968<br>(543 971 to 789 394)                  | 273<br>(231 to 326)                     | -29.5<br>(-33.9 to -24.6)                                         | 1 478 919<br>(1 300 607 to 1 728 999)            | 613<br>(541 to 711)                     | -28.3<br>(-30.5 to -26.3)                                         |

| Location                           | Incidence (95% UI)                               |                                         |                                                                   | Prevalence (95% UI)                              |                                         |                                                                   |
|------------------------------------|--------------------------------------------------|-----------------------------------------|-------------------------------------------------------------------|--------------------------------------------------|-----------------------------------------|-------------------------------------------------------------------|
|                                    | 2017 counts                                      | 2017 age-standardised rates per 100,000 | Percentage change in age-standardised rates between 1990 and 2017 | 2017 counts                                      | 2017 age-standardised rates per 100,000 | Percentage change in age-standardised rates between 1990 and 2017 |
| Laos                               | 27 395<br>(23 238 to 32 211)                     | 426<br>(368 to 493)                     | 63.0<br>(51.8 to 74.4)                                            | 54 750<br>(48 334 to 62 213)                     | 966<br>(861 to 1 089)                   | 59.0<br>(53.7 to 64.3)                                            |
| Malaysia                           | 123 322<br>(102 861 to 147 763)                  | 417<br>(351 to 496)                     | 70.1<br>(58.7 to 81.8)                                            | 276 611<br>(243 961 to 317 962)                  | 276 611<br>(832 to 1 075)               | 938<br>(60.2 to 76.9)                                             |
| Maldives                           | 1 836<br>(1 528 to 2 213)                        | 424<br>(359 to 498)                     | 29.7<br>(20.1 to 42.1)                                            | 4 071<br>(3 578 to 4 670)                        | 955<br>(845 to 1 086)                   | 27.4<br>(23.2 to 32.1)                                            |
| Mauritius                          | 5 928<br>(5 154 to 6 933)                        | 465<br>(397 to 544)                     | 60.0<br>(50.0 to 70.4)                                            | 16 068<br>(14 236 to 18 316)                     | 1 055<br>(929 to 1 199)                 | 57.5<br>(51.0 to 64.2)                                            |
| Myanmar                            | 271 773<br>(238 553 to 312 106)                  | 536<br>(473 to 610)                     | 40.7<br>(33.3 to 49.9)                                            | 581 330<br>(516 566 to 655 758)                  | 1 161<br>(1 038 to 1 306)               | 38.1<br>(34.2 to 41.8)                                            |
| Philippines                        | 364 928<br>(308 087 to 434 894)                  | 369<br>(315 to 433)                     | 87.7<br>(74.5 to 102.1)                                           | 751 580<br>(658 588 to 863 634)                  | 837<br>(738 to 955)                     | 81.7<br>(73.7 to 89.5)                                            |
| Sri Lanka                          | 115 106<br>(100 678 to 132 382)                  | 523<br>(456 to 601)                     | 50.3<br>(39.6 to 61.1)                                            | 261 390<br>(232 626 to 297 059)                  | 1 104<br>(984 to 1 253)                 | 43.9<br>(39.5 to 49.1)                                            |
| Seychelles                         | 511<br>(445 to 595)                              | 495<br>(432 to 582)                     | 56.8<br>(47.7 to 67.1)                                            | 1 213<br>(1 071 to 1 375)                        | 1 099<br>(974 to 1 246)                 | 54.8<br>(49.2 to 61.2)                                            |
| Thailand                           | 329 474<br>(283 509 to 380 917)                  | 447<br>(382 to 523)                     | 32.7<br>(23.6 to 42.8)                                            | 879 742<br>(782 178 to 999 750)                  | 492<br>(880 to 1 125)                   | 34.7<br>(30.2 to 39.9)                                            |
| Timor-Leste                        | 5 119<br>(4 262 to 6 119)                        | 428<br>(367 to 500)                     | 80.3<br>(67.9 to 92.5)                                            | 9 540<br>(8 439 to 10 869)                       | 970<br>(864 to 1 098)                   | 72.9<br>(66.3 to 80.4)                                            |
| Vietnam                            | 555 596<br>(487 358 to 634 919)                  | 592<br>(520 to 677)                     | 53.8<br>(45.3 to 63.5)                                            | 1 202 264<br>(1 073 553 to 1 355 875)            | 1 231<br>(1 102 to 1 387)               | 53.7<br>(48.8 to 59.1)                                            |
| <b>Sub-Saharan Africa</b>          | <b>13 312 641<br/>(11 202 194 to 15 911 838)</b> | <b>1 585<br/>(1 387 to 1 917)</b>       | <b>0.6<br/>(-3.4 to 4.5)</b>                                      | <b>22 799 916<br/>(19 338 138 to 25 333 682)</b> | <b>3 365<br/>(2 988 to 3 792)</b>       | <b>1.3<br/>(0.2 to 2.3)</b>                                       |
| <b>Central sub-Saharan Africa</b>  | <b>1 384 416<br/>(1 159 424 to 1 647 365)</b>    | <b>1 439<br/>(1 254 to 1 643)</b>       | <b>5.4<br/>(0.8 to 10.0)</b>                                      | <b>2 308 971<br/>(2 016 706 to 2 627 336)</b>    | <b>3 047<br/>(2 712 to 3 430)</b>       | <b>6.0<br/>(4.3 to 7.5)</b>                                       |
| Angola                             | 337 738<br>(284 330 to 401 232)                  | 1 645<br>(1 447 to 1 861)               | 1.8<br>(-3.3 to 7.2)                                              | 534 079<br>(469 414 to 607 797)                  | 3 357<br>(2 988 to 3 776)               | -0.4<br>(-2.0 to 1.4)                                             |
| Central African Republic           | 49 775<br>(41 838 to 59 024)                     | 1 302<br>(1 137 to 1 493)               | 7.5<br>(1.5 to 13.3)                                              | 87 815<br>(76 841 to 100 310)                    | 2 816<br>(2 504 to 3 161)               | 10.8<br>(8.2 to 13.4)                                             |
| Congo (Brazzaville)                | 60 930<br>(51 862 to 71 202)                     | 1 534<br>(1 332 to 1 753)               | -1.8<br>(-7.1 to 3.5)                                             | 109 468<br>(96 246 to 124 071)                   | 3 169<br>(2 820 to 3 549)               | -0.4<br>(-2.2 to 1.3)                                             |
| DR Congo                           | 894 868<br>(744 923 to 1 072 234)                | 1 365<br>(1 181 to 1 568)               | 6.9<br>(1.5 to 12.5)                                              | 1 507 505<br>(1 315 899 to 1 719 802)            | 2 941<br>(2 614 to 3 310)               | 8.4<br>(6.2 to 10.5)                                              |
| Equatorial Guinea                  | 16 784<br>(14 064 to 20 174)                     | 1 683<br>(1 477 to 1 916)               | 30.0<br>(22.8 to 37.4)                                            | 25 192<br>(22 071 to 28 225)                     | 3 291<br>(2 930 to 3 707)               | 19.8<br>(17.0 to 22.7)                                            |
| Gabon                              | 24 321<br>(20 955 to 28 161)                     | 1 696<br>(1 485 to 1 929)               | -11.4<br>(-16.7 to -5.8)                                          | 44 911<br>(39 614 to 50 755)                     | 3 471<br>(3 091 to 3 900)               | -9.0<br>(-10.6 to -7.3)                                           |
| <b>Eastern sub-Saharan Africa</b>  | <b>5 253 032 to 7 503 431</b>                    | <b>1 835<br/>(1 595 to 2 096)</b>       | <b>9.0<br/>(-14.6 to -3.7)</b>                                    | <b>8 919 131 to 11 657 411</b>                   | <b>3 942<br/>(3 496 to 4 447)</b>       | <b>-4.5<br/>(-6.5 to -2.2)</b>                                    |
| Burundi                            | 159 367<br>(132 203 to 193 238)                  | 1 835<br>(1 595 to 2 096)               | 9.0<br>(-14.6 to -3.7)                                            | 261 510<br>(227 444 to 300 475)                  | 3 942<br>(3 496 to 4 447)               | -4.5<br>(-6.5 to -2.2)                                            |
| Comoros                            | 12 392<br>(10 567 to 14 644)                     | 1 952<br>(1 705 to 2 245)               | -5.7<br>(-11.2 to -0.5)                                           | 23 561<br>(20 684 to 26 718)                     | 4 172<br>(3 707 to 4 708)               | -5.1<br>(-7.1 to -2.9)                                            |
| Djibouti                           | 18 893<br>(16 201 to 22 165)                     | 2 079<br>(1 830 to 2 378)               | -5.5<br>(-10.9 to 0.2)                                            | 36 025<br>(31 538 to 41 136)                     | 4 390<br>(3 899 to 4 945)               | -4.3<br>(-5.9 to -2.5)                                            |
| Eritrea                            | 93 626<br>(79 068 to 110 944)                    | 2 026<br>(1 790 to 2 297)               | 2.5<br>(-2.8 to 8.1)                                              | 154 710<br>(134 738 to 177 045)                  | 4 167<br>(3 708 to 4 675)               | 1.8<br>(0.2 to 3.6)                                               |
| Ethiopia                           | 1 462 066<br>(1 219 718 to 1 768 436)            | 1 861<br>(1 614 to 2 167)               | -7.3<br>(-11.6 to -2.7)                                           | 2 378 021<br>(2 071 706 to 2 715 632)            | 3 908<br>(3 457 to 4 411)               | -4.9<br>(-6.6 to -3.1)                                            |
| Kenya                              | 953 132<br>(803 115 to 1 132 723)                | 2 437<br>(2 121 to 2 803)               | 11.2<br>(6.8 to 15.1)                                             | 1 638 927<br>(1 417 177 to 1 896 755)            | 5 268<br>(4 636 to 6 012)               | 13.4<br>(11.2 to 15.6)                                            |
| Madagascar                         | 406 930<br>(338 817 to 489 470)                  | 1 902<br>(1 661 to 2 177)               | -2.5<br>(-8.6 to 3.0)                                             | 4 120<br>(591 095 to 777 498)                    | 1 120<br>(3 638 to 6 638)               | -3.1<br>(-5.3 to -0.6)                                            |
| Malawi                             | 267 854<br>(226 087 to 319 449)                  | 1 932<br>(1 712 to 2 190)               | 1.1<br>(-3.7 to 6.2)                                              | 435 216<br>(382 584 to 498 067)                  | 3 998<br>(3 554 to 4 498)               | 2.8<br>(0.7 to 4.7)                                               |
| Mozambique                         | 489 770<br>(409 743 to 587 058)                  | 2 152<br>(1 891 to 2 444)               | 9.9<br>(4.0 to 16.0)                                              | 748 843<br>(654 444 to 851 070)                  | 4 364<br>(3 889 to 4 898)               | 7.1<br>(5.2 to 9.4)                                               |
| Rwanda                             | 198 008<br>(166 126 to 238 037)                  | 1 938<br>(1 699 to 2 225)               | -8.4<br>(-13.9 to -2.9)                                           | 338 370<br>(295 308 to 387 167)                  | 4 053<br>(3 591 to 4 559)               | -6.6<br>(-8.7 to -4.8)                                            |
| Somalia                            | 248 751<br>(206 588 to 303 438)                  | 1 842<br>(1 608 to 2 109)               | 8.1<br>(2.9 to 12.8)                                              | 404 757<br>(351 109 to 464 115)                  | 4 001<br>(3 534 to 4 505)               | 9.7<br>(7.7 to 11.9)                                              |
| South Sudan                        | 160 057<br>(134 678 to 194 096)                  | 2 035<br>(1 785 to 2 337)               | 1.6<br>(-3.8 to 6.5)                                              | 255 470<br>(222 993 to 291 637)                  | 4 347<br>(3 859 to 4 901)               | 4.4<br>(2.3 to 6.5)                                               |
| Tanzania                           | 906 582<br>(773 546 to 1 081 057)                | 2 099<br>(1 857 to 2 376)               | 2.6<br>(-2.9 to 8.0)                                              | 1 496 145<br>(1 310 157 to 1 703 384)            | 4 362<br>(3 885 to 4 911)               | 3.4<br>(1.7 to 5.0)                                               |
| Uganda                             | 590 422<br>(491 649 to 721 514)                  | 1 886<br>(1 651 to 2 170)               | 13.0<br>(8.2 to 17.7)                                             | 905 569<br>(785 266 to 1 042 560)                | 3 998<br>(3 537 to 4 494)               | 15.1<br>(12.8 to 17.6)                                            |
| Zambia                             | 285 704<br>(243 159 to 342 294)                  | 2 193<br>(1 946 to 2 487)               | 4.5<br>(-10.1 to 0.4)                                             | 457 210<br>(398 984 to 525 604)                  | 4 458<br>(3 965 to 5 011)               | -3.7<br>(-5.7 to -1.7)                                            |
| <b>Southern sub-Saharan Africa</b> | <b>783 539<br/>(660 901 to 927 509)</b>          | <b>1 094<br/>(934 to 1 277)</b>         | <b>6.9<br/>(3.4 to 10.3)</b>                                      | <b>1 588 819<br/>(1 386 207 to 1 814 625)</b>    | <b>2 364<br/>(2 084 to 2 685)</b>       | <b>10.0<br/>(8.2 to 12.1)</b>                                     |
| Botswana                           | 22 497<br>(18 858 to 26 839)                     | 1 121<br>(961 to 1 304)                 | 3.9<br>(-1.4 to 9.4)                                              | 44 067<br>(38 357 to 50 964)                     | 2 349<br>(2 071 to 2 672)               | 3.6<br>(1.3 to 6.4)                                               |
| Lesotho                            | 18 638<br>(15 651 to 22 158)                     | 1 081<br>(933 to 1 248)                 | 16.9<br>(12.1 to 21.9)                                            | 35 456<br>(30 871 to 40 448)                     | 2 285<br>(2 018 to 2 583)               | 15.0<br>(12.6 to 17.9)                                            |
| Namibia                            | 23 192<br>(19 459 to 27 532)                     | 1 110<br>(959 to 1 289)                 | 1.3<br>(-4.3 to 6.6)                                              | 42 942<br>(37 528 to 49 369)                     | 2 335<br>(2 072 to 2 645)               | 2.1<br>(-0.3 to 4.7)                                              |
| South Africa                       | 565 374<br>(477 501 to 669 633)                  | 1 086<br>(928 to 1 278)                 | 7.7<br>(3.6 to 11.5)                                              | 1 199 313<br>(1 048 571 to 1 371 373)            | 2 354<br>(2 076 to 2 674)               | 10.6<br>(8.6 to 12.9)                                             |
| Swaziland                          | 10 647<br>(8 842 to 12 717)                      | 1 102<br>(955 to 1 271)                 | 6.1<br>(1.2 to 11.6)                                              | 18 886<br>(16 545 to 21 681)                     | 2 314<br>(2 054 to 2 623)               | 6.7<br>(4.4 to 9.0)                                               |
| Zimbabwe                           | 143 192<br>(119 532 to 172 513)                  | 1 168<br>(1 018 to 1 349)               | 11.6<br>(1.1 to 11.7)                                             | 248 155<br>(214 732 to 283 358)                  | 2 469<br>(2 181 to 2 789)               | 9.9<br>(7.3 to 12.4)                                              |
| <b>Western sub-Saharan Africa</b>  | <b>4 090 246 to 5 814 346</b>                    | <b>1 377<br/>(1 202 to 1 573)</b>       | <b>-4.6<br/>(-9.4 to 0.4)</b>                                     | <b>8 060 548<br/>(7 056 412 to 9 186 624)</b>    | <b>2 964<br/>(2 631 to 3 333)</b>       | <b>-5.2<br/>(-6.3 to -4.1)</b>                                    |
| Benin                              | 124 717<br>(103 339 to 150 605)                  | 1 291<br>(1 115 to 1 487)               | -5.6<br>(-11.7 to 0.0)                                            | 205 588<br>(178 823 to 234 573)                  | 2 842<br>(2 513 to 3 193)               | 4.7<br>(-3.3 to 13.3)                                             |
| Burkina Faso                       | 261 546<br>(224 754 to 307 546)                  | 1 620<br>(1 436 to 1 830)               | -4.0<br>(-8.9 to 1.1)                                             | 421 164<br>(371 412 to 475 402)                  | 3 334<br>(2 980 to 3 739)               | -4.1<br>(-5.7 to -2.5)                                            |
| Cameroon                           | 316 255<br>(265 044 to 377 492)                  | 1 382<br>(1 211 to 1 587)               | -11.5<br>(-17.0 to -6.1)                                          | 524 826<br>(458 218 to 600 423)                  | 2 977<br>(2 642 to 3 355)               | -10.2<br>(-11.9 to -8.4)                                          |
| Cape Verde                         | 160 558<br>(5 539 to 7 758)                      | 1 325<br>(1 049 to 1 425)               | 6.5<br>(6.7 to 16.3)                                              | 250 268<br>(12 003 to 15 484)                    | 2 962<br>(2 396 to 3 067)               | 8.6<br>(7.4 to 12.1)                                              |
| Chad                               | 132 985 to 194 187                               | 1 156 to 1 520                          | (1.0 to 11.8)                                                     | 218 617 to 283 549                               | 2 625 to 3 329                          | (6.3 to 10.9)                                                     |
| Cote d'Ivoire                      | 280 607<br>(235 856 to 334 523)                  | 1 369<br>(1 193 to 1 563)               | -8.3<br>(-13.7 to -2.6)                                           | 486 432<br>(424 637 to 558 341)                  | 2 991<br>(2 652 to 3 366)               | -7.3<br>(-8.9 to -5.3)                                            |
| The Gambia                         | 24 003<br>(19 807 to 28 674)                     | 1 319<br>(1 139 to 1 514)               | -2.8<br>(-8.4 to 2.0)                                             | 40 273<br>(35 115 to 45 899)                     | 2 885<br>(2 554 to 3 246)               | -2.8<br>(-4.6 to -0.8)                                            |
| Ghana                              | 393 890<br>(337 465 to 462 131)                  | 1 584<br>(1 396 to 1 796)               | 10.2<br>(4.6 to 16.1)                                             | 680 807<br>(608 315 to 781 358)                  | 3 246<br>(2 888 to 3 645)               | 6.3<br>(4.2 to 8.4)                                               |
| Guinea                             | 129 686<br>(108 858 to 154 865)                  | 1 304<br>(1 135 to 1 497)               | -5.1<br>(-10.2 to -0.2)                                           | 219 808<br>(192 536 to 250 433)                  | 2 895<br>(2 573 to 3 263)               | -4.5<br>(-6.3 to -2.4)                                            |
| Guinea-Bissau                      | 18 835<br>(15 649 to 22 676)                     | 1 234<br>(1 077 to 1 422)               | -11.3<br>(-16.9 to -5.9)                                          | 31 297<br>(27 174 to 36 023)                     | 2 713<br>(2 397 to 3 059)               | -10.4<br>(-12.2 to -8.7)                                          |
| Liberia                            | 49 085<br>(40 484 to 59 226)                     | 1 204<br>(1 038 to 1 400)               | -7.6<br>(-14.3 to -1.4)                                           | 84 817<br>(73 614 to 97 168)                     | 2 702<br>(2 374 to 3 044)               | -6.5<br>(-8.4 to -4.5)                                            |
| Mali                               | 214 790<br>(176 951 to 259 269)                  | 1 276<br>(1 103 to 1 469)               | -3.2<br>(-9.5 to 2.4)                                             | 346 839<br>(302 244 to 397 309)                  | 2 841<br>(2 504 to 3 208)               | -2.7<br>(-5.0 to -0.6)                                            |
| Mauritania                         | 45 865<br>(38 411 to 54 923)                     | 1 352<br>(1 175 to 1 566)               | -11.8<br>(-17.7 to -5.4)                                          | 79 675<br>(69 860 to 90 178)                     | 2 965<br>(2 635 to 3 323)               | -10.2<br>(-12.0 to -8.1)                                          |

| Location              | Incidence (95% UI)                    |                                         |                                                                   | Prevalence (95% UI)                   |                                         |                                                                   |
|-----------------------|---------------------------------------|-----------------------------------------|-------------------------------------------------------------------|---------------------------------------|-----------------------------------------|-------------------------------------------------------------------|
|                       | 2017 counts                           | 2017 age-standardised rates per 100,000 | Percentage change in age-standardised rates between 1990 and 2017 | 2017 counts                           | 2017 age-standardised rates per 100,000 | Percentage change in age-standardised rates between 1990 and 2017 |
| Niger                 | 216 174<br>(176 516 to 268 586)       | 1 248<br>(1 081 to 1 452)               | -5.5<br>(-11.6 to 1.0)                                            | 331 276<br>(288 335 to 378 987)       | 2 805<br>(2 485 to 3 159)               | -5.1<br>(-7.0 to -3.1)                                            |
| Nigeria               | 2 309 653<br>(1 926 332 to 2 758 290) | 1 370<br>(1 183 to 1 576)               | -5.9<br>(-12.0 to -0.1)                                           | 3 751 042<br>(3 287 478 to 4 287 688) | 2 937<br>(2 604 to 3 310)               | -7.2<br>(-8.9 to -5.4)                                            |
| Sao Tome and Principe | 3 436<br>(3 000 to 3 979)             | 1 975<br>(1 755 to 2 234)               | -1.4<br>(-7.1 to 4.9)                                             | 6 000<br>(5 300 to 6 800)             | 4 192<br>(3 724 to 4 736)               | -6.3<br>(-8.5 to -4.0)                                            |
| Senegal               | 166 558<br>(139 141 to 197 758)       | 1 331<br>(1 155 to 1 532)               | -6.9<br>(-12.4 to -0.5)                                           | 290 933<br>(255 447 to 329 724)       | 2 917<br>(2 597 to 3 276)               | -7.1<br>(-8.6 to -5.5)                                            |
| Sierra Leone          | 83 184<br>(69 008 to 99 780)          | 1 258<br>(1 086 to 1 447)               | -5.6<br>(-11.5 to -0.2)                                           | 142 636<br>(124 135 to 162 832)       | 2 772<br>(2 449 to 3 129)               | -5.8<br>(-7.6 to -4.1)                                            |
| Togo                  | 81 738<br>(67 864 to 98 041)          | 1 256<br>(1 088 to 1 452)               | -5.8<br>(-11.7 to -0.1)                                           | 144 156<br>(125 451 to 164 284)       | 2 754<br>(2 438 to 3 094)               | -5.0<br>(-6.8 to -3.0)                                            |
