# Supplementary material for: The global burden of falls: global, regional and national estimates of morbidity and mortality from the Global Burden of Disease Study 2017
Source: HighWire-hosted journal article supplement (doi:10.1136/injuryprev-2019-043286), 2020-01-15
Supplement: injuryprev-2019-043286supp004_data_supplement.pdf [file injuryprev-2019-043286supp004_data_supplement.pdf]

| Table 2: Mortality for 2017 and percentage change of age-standardised rates between 1990 and 2017 by location for falls |                                        |                                         |                                                                   |
|-------------------------------------------------------------------------------------------------------------------------|----------------------------------------|-----------------------------------------|-------------------------------------------------------------------|
| Location                                                                                                                | Mortality (95% UI)                     |                                         |                                                                   |
|                                                                                                                         | 2017 counts                            | 2017 age-standardised rates per 100,000 | Percentage change in age-standardised rates between 1990 and 2017 |
| <b>Global</b>                                                                                                           | <b>695 771</b><br>(644 927 to 741 720) | <b>9.2</b><br>(8.5 to 9.8)              | <b>-5.9</b><br>(-13.7 to 3.5)                                     |
| <b>Low SDI</b>                                                                                                          | <b>93 850</b><br>(86 459 to 104 963)   | <b>15.1</b><br>(13.9 to 17.1)           | <b>-10.8</b><br>(-22.4 to 6.0)                                    |
| <b>Low-middle SDI</b>                                                                                                   | <b>157 311</b><br>(144 698 to 175 240) | <b>15.3</b><br>(14.1 to 17.2)           | <b>-2.7</b><br>(-19.3 to 18.3)                                    |
| <b>Middle SDI</b>                                                                                                       | <b>192 591</b><br>(167 707 to 212 051) | <b>10.1</b><br>(8.9 to 11.0)            | <b>-8.3</b><br>(-17.6 to 5.7)                                     |
| <b>High-middle SDI</b>                                                                                                  | <b>105 593</b><br>(93 147 to 112 263)  | <b>6.7</b><br>(5.9 to 7.1)              | <b>-2.2</b><br>(-19.4 to 9.2)                                     |
| <b>High SDI</b>                                                                                                         | <b>143 826</b><br>(140 311 to 147 243) | <b>5.7</b><br>(5.6 to 5.9)              | <b>-16.6</b><br>(-18.8 to -14.4)                                  |
| <b>Central Europe, Eastern Europe, and Central Asia</b>                                                                 | <b>35 374</b><br>(34 224 to 36 301)    | <b>6.3</b><br>(6.1 to 6.5)              | <b>-25.8</b><br>(-28.2 to -23.6)                                  |
| <b>Central Asia</b>                                                                                                     | <b>2 868</b><br>(2 682 to 3 094)       | <b>3.6</b><br>(3.4 to 3.9)              | <b>-33.5</b><br>(-38.0 to -27.9)                                  |
| Armenia                                                                                                                 | 88<br>(83 to 94)                       | 2.4<br>(2.2 to 2.5)                     | -68.5<br>(-71.1 to -65.8)                                         |
| Azerbaijan                                                                                                              | 258<br>(205 to 360)                    | 2.9<br>(2.3 to 3.8)                     | -32.3<br>(-48.4 to -3.1)                                          |
| Georgia                                                                                                                 | 262<br>(243 to 280)                    | 5.1<br>(4.7 to 5.4)                     | -17.4<br>(-24.8 to -9.6)                                          |
| Kazakhstan                                                                                                              | 780<br>(706 to 851)                    | 4.5<br>(4.1 to 4.8)                     | -18.0<br>(-25.3 to -11.0)                                         |
| Kyrgyzstan                                                                                                              | 132<br>(120 to 144)                    | 2.5<br>(2.3 to 2.7)                     | -65.3<br>(-68.5 to -61.8)                                         |
| Mongolia                                                                                                                | 206<br>(149 to 253)                    | 6.9<br>(5.1 to 8.4)                     | -9.1<br>(-27.4 to 14.5)                                           |
| Tajikistan                                                                                                              | 311<br>(269 to 388)                    | 4.0<br>(3.5 to 4.9)                     | -34.6<br>(-45.7 to -11.4)                                         |
| Turkmenistan                                                                                                            | 106<br>(94 to 118)                     | 2.6<br>(2.3 to 2.8)                     | -35.7<br>(-43.5 to -28.0)                                         |
| Uzbekistan                                                                                                              | 725<br>(635 to 820)                    | 2.9<br>(2.6 to 3.3)                     | -36.1<br>(-43.7 to -28.2)                                         |
| <b>Central Europe</b>                                                                                                   | <b>14 438</b><br>(13 990 to 14 908)    | <b>7.1</b><br>(6.9 to 7.4)              | <b>-47.0</b><br>(-48.9 to -45.0)                                  |
| Albania                                                                                                                 | 80<br>(64 to 101)                      | 2.2<br>(1.8 to 2.7)                     | -3.1<br>(-24.2 to 21.2)                                           |
| Bosnia and Herzegovina                                                                                                  | 118<br>(103 to 136)                    | 2.2<br>(2.0 to 2.5)                     | -21.3<br>(-41.6 to 15.0)                                          |
| Bulgaria                                                                                                                | 501<br>(462 to 540)                    | 4.2<br>(3.9 to 4.6)                     | -30.7<br>(-36.3 to -24.6)                                         |
| Croatia                                                                                                                 | 1 150<br>(1 072 to 1 237)              | 12.8<br>(11.9 to 13.7)                  | 24.9<br>(14.4 to 35.9)                                            |
| Czech Republic                                                                                                          | 1 461<br>(1 346 to 1 580)              | 7.2<br>(6.6 to 7.7)                     | -72.5<br>(-74.6 to -70.2)                                         |
| Hungary                                                                                                                 | 1 874<br>(1 767 to 1 984)              | 9.4<br>(8.8 to 9.9)                     | -69.1<br>(-71.1 to -67.1)                                         |
| Macedonia                                                                                                               | 99<br>(80 to 112)                      | 3.2<br>(2.6 to 3.7)                     | 36.5<br>(-12.3 to 73.0)                                           |
| Montenegro                                                                                                              | 26<br>(22 to 30)                       | 2.9<br>(2.5 to 3.4)                     | -19.0<br>(-31.6 to -4.0)                                          |
| Poland                                                                                                                  | 5 567<br>(5 195 to 5 967)              | 8.2<br>(7.7 to 8.8)                     | -31.9<br>(-36.9 to -26.3)                                         |
| Romania                                                                                                                 | 1 677<br>(1 567 to 1 787)              | 5.4<br>(5.0 to 5.8)                     | -39.8<br>(-44.2 to -35.6)                                         |
| Serbia                                                                                                                  | 584<br>(485 to 649)                    | 3.9<br>(3.3 to 4.3)                     | 3.2<br>(-11.3 to 19.9)                                            |
| Slovakia                                                                                                                | 758<br>(638 to 856)                    | 9.1<br>(7.7 to 10.3)                    | -46.1<br>(-53.3 to -34.9)                                         |
| Slovenia                                                                                                                | 543<br>(501 to 589)                    | 11.6<br>(10.7 to 12.5)                  | -33.3<br>(-38.9 to -27.2)                                         |

| Location                         | Mortality (95% UI)                     |                                         |                                                                   |
|----------------------------------|----------------------------------------|-----------------------------------------|-------------------------------------------------------------------|
|                                  | 2017 counts                            | 2017 age-standardised rates per 100,000 | Percentage change in age-standardised rates between 1990 and 2017 |
| <b>Eastern Europe</b>            | <b>18 067</b><br>(17 367 to 18 629)    | <b>6.3</b><br>(6.0 to 6.5)              | <b>-0.6</b><br>(-4.5 to 2.5)                                      |
| Belarus                          | 982<br>(884 to 1 076)                  | 7.3<br>(6.5 to 8.0)                     | 7.7<br>(-3.6 to 18.5)                                             |
| Estonia                          | 119<br>(103 to 136)                    | 5.4<br>(4.7 to 6.2)                     | -54.6<br>(-61.0 to -47.6)                                         |
| Latvia                           | 244<br>(216 to 274)                    | 7.3<br>(6.4 to 8.2)                     | -49.5<br>(-55.9 to -42.8)                                         |
| Lithuania                        | 474<br>(441 to 506)                    | 9.5<br>(8.8 to 10.2)                    | -17.3<br>(-23.9 to -10.2)                                         |
| Moldova                          | 249<br>(232 to 267)                    | 4.8<br>(4.5 to 5.2)                     | -45.9<br>(-49.8 to -41.7)                                         |
| Russian Federation               | 12 477<br>(12 058 to 12 822)           | 6.3<br>(6.1 to 6.5)                     | 11.6<br>(4.9 to 15.3)                                             |
| Ukraine                          | 3 522<br>(3 290 to 3 790)              | 5.8<br>(5.4 to 6.3)                     | -16.7<br>(-22.8 to -9.3)                                          |
| <b>High-income</b>               | <b>131 213</b><br>(127 836 to 134 821) | <b>5.4</b><br>(5.3 to 5.6)              | <b>-12.9</b><br>(-15.4 to -10.4)                                  |
| <b>Australasia</b>               | <b>3 739</b><br>(3 431 to 4 043)       | <b>6.5</b><br>(5.9 to 7.0)              | <b>32.1</b><br>(20.8 to 44.4)                                     |
| Australia                        | 3 172<br>(2 863 to 3 476)              | 6.5<br>(5.8 to 7.1)                     | 41.8<br>(28.0 to 58.0)                                            |
| New Zealand                      | 567<br>(527 to 610)                    | 6.6<br>(6.1 to 7.1)                     | 0.6<br>(-7.2 to 8.7)                                              |
| <b>High-income Asia-Pacific</b>  | <b>16 160</b><br>(15 448 to 16 859)    | <b>3.4</b><br>(3.2 to 3.5)              | <b>-24.1</b><br>(-27.9 to -20.1)                                  |
| Brunei                           | 19<br>(17 to 22)                       | 5.9<br>(5.3 to 7.0)                     | -16.5<br>(-29.7 to 2.7)                                           |
| Japan                            | 12 142<br>(11 671 to 12 623)           | 2.9<br>(2.8 to 3.1)                     | -20.3<br>(-23.7 to -16.6)                                         |
| South Korea                      | 3 834<br>(3 477 to 4 196)              | 5.0<br>(4.6 to 5.5)                     | -22.1<br>(-29.6 to -14.5)                                         |
| Singapore                        | 165<br>(151 to 179)                    | 2.6<br>(2.3 to 2.8)                     | -26.8<br>(-33.5 to -20.1)                                         |
| <b>High-income North America</b> | <b>44 300</b><br>(43 240 to 45 357)    | <b>6.6</b><br>(6.4 to 6.7)              | <b>57.2</b><br>(52.9 to 61.3)                                     |
| Canada                           | 5 922<br>(5 481 to 6 406)              | 7.6<br>(7.0 to 8.2)                     | 22.0<br>(11.6 to 33.0)                                            |
| Greenland                        | 8<br>(8 to 10)                         | 15.8<br>(14.3 to 18.0)                  | -22.5<br>(-33.1 to -7.7)                                          |
| USA                              | 38 368<br>(37 389 to 39 312)           | 6.4<br>(6.3 to 6.6)                     | 61.0<br>(56.5 to 65.2)                                            |
| <b>Southern Latin America</b>    | <b>3 143</b><br>(2 919 to 3 379)       | <b>3.8</b><br>(3.5 to 4.1)              | <b>-22.9</b><br>(-29.0 to -16.5)                                  |
| Argentina                        | 1 619<br>(1 464 to 1 798)              | 3.0<br>(2.7 to 3.3)                     | -37.6<br>(-44.0 to -30.4)                                         |
| Chile                            | 1 274<br>(1 147 to 1 411)              | 5.6<br>(5.0 to 6.2)                     | 8.8<br>(-3.1 to 20.9)                                             |
| Uruguay                          | 250<br>(223 to 277)                    | 4.2<br>(3.8 to 4.7)                     | -16.3<br>(-25.8 to -5.9)                                          |
| <b>Western Europe</b>            | <b>63 871</b><br>(61 445 to 66 265)    | <b>5.9</b><br>(5.7 to 6.1)              | <b>-28.2</b><br>(-31.3 to -25.1)                                  |
| Andorra                          | 9<br>(7 to 11)                         | 5.6<br>(4.6 to 6.9)                     | -16.0<br>(-31.2 to 3.6)                                           |
| Austria                          | 1 408<br>(1 302 to 1 522)              | 7.1<br>(6.6 to 7.6)                     | -43.8<br>(-48.3 to -39.1)                                         |
| Belgium                          | 2 156<br>(1 993 to 2 329)              | 8.1<br>(7.5 to 8.7)                     | 9.5<br>(0.1 to 19.2)                                              |
| Cyprus                           | 87<br>(75 to 98)                       | 4.7<br>(4.1 to 5.3)                     | -36.1<br>(-47.6 to -18.9)                                         |
| Denmark                          | 827<br>(765 to 898)                    | 6.5<br>(6.0 to 7.0)                     | -58.7<br>(-62.1 to -54.6)                                         |
| Finland                          | 1 339<br>(1 252 to 1 433)              | 10.2<br>(9.5 to 10.9)                   | -15.1<br>(-21.4 to -8.0)                                          |

| Location                           | Mortality (95% UI)                         |                                         |                                                                   |
|------------------------------------|--------------------------------------------|-----------------------------------------|-------------------------------------------------------------------|
|                                    | 2017 counts                                | 2017 age-standardised rates per 100,000 | Percentage change in age-standardised rates between 1990 and 2017 |
| France                             | 13 812<br>(12 711 to 14 953)               | 7.8<br>(7.2 to 8.4)                     | -38.6<br>(-44.1 to -32.5)                                         |
| Germany                            | 14 328<br>(12 997 to 15 881)               | 6.5<br>(5.9 to 7.2)                     | -23.6<br>(-31.9 to -14.6)                                         |
| Greece                             | 672<br>(626 to 723)                        | 2.8<br>(2.6 to 3.0)                     | -41.0<br>(-45.2 to -36.6)                                         |
| Iceland                            | 35<br>(33 to 38)                           | 5.8<br>(5.4 to 6.2)                     | -7.1<br>(-14.7 to 1.5)                                            |
| Ireland                            | 323<br>(296 to 352)                        | 4.4<br>(4.0 to 4.8)                     | -32.5<br>(-38.4 to -25.6)                                         |
| Israel                             | 369<br>(339 to 399)                        | 2.9<br>(2.7 to 3.2)                     | -29.3<br>(-35.4 to -22.5)                                         |
| Italy                              | 7 665<br>(7 068 to 8 314)                  | 4.2<br>(3.9 to 4.5)                     | -45.4<br>(-50.0 to -40.4)                                         |
| Luxembourg                         | 82<br>(73 to 92)                           | 7.7<br>(6.9 to 8.6)                     | -17.0<br>(-26.8 to -6.6)                                          |
| Malta                              | 55<br>(51 to 60)                           | 6.4<br>(5.9 to 6.9)                     | -17.8<br>(-25.2 to -10.0)                                         |
| Netherlands                        | 3 465<br>(3 203 to 3 740)                  | 9.2<br>(8.6 to 10.0)                    | 41.6<br>(29.3 to 55.3)                                            |
| Norway                             | 1 014<br>(973 to 1 055)                    | 8.8<br>(8.4 to 9.2)                     | -21.4<br>(-25.1 to -17.9)                                         |
| Portugal                           | 784<br>(722 to 843)                        | 3.2<br>(2.9 to 3.4)                     | -52.4<br>(-56.6 to -48.4)                                         |
| Spain                              | 3 996<br>(3 708 to 4 301)                  | 3.6<br>(3.3 to 3.8)                     | -19.7<br>(-26.0 to -13.5)                                         |
| Sweden                             | 1 670<br>(1 560 to 1 786)                  | 6.6<br>(6.2 to 7.0)                     | 2.8<br>(-4.8 to 11.1)                                             |
| Switzerland                        | 1 929<br>(1 785 to 2 083)                  | 9.3<br>(8.6 to 10.0)                    | -41.1<br>(-46.0 to -35.7)                                         |
| United Kingdom                     | 7 781<br>(7 617 to 7 958)                  | 5.4<br>(5.3 to 5.6)                     | 12.3<br>(9.5 to 15.1)                                             |
| <b>Latin America and Caribbean</b> | <b>35 929</b><br><b>(34 977 to 36 769)</b> | <b>6.5</b><br><b>(6.3 to 6.6)</b>       | <b>-22.5</b><br><b>(-25.0 to -20.3)</b>                           |
| <b>Andean Latin America</b>        | <b>2 568</b><br><b>(2 263 to 2 824)</b>    | <b>4.6</b><br><b>(4.1 to 5.1)</b>       | <b>-14.8</b><br><b>(-27.1 to -3.1)</b>                            |
| Bolivia                            | 518<br>(387 to 653)                        | 6.2<br>(4.7 to 7.8)                     | -22.0<br>(-38.3 to -0.3)                                          |
| Ecuador                            | 966<br>(870 to 1 070)                      | 6.5<br>(5.9 to 7.2)                     | -19.8<br>(-27.8 to -10.6)                                         |
| Peru                               | 1 084<br>(818 to 1 312)                    | 3.4<br>(2.6 to 4.1)                     | -5.8<br>(-34.1 to 20.5)                                           |
| <b>Caribbean</b>                   | <b>3 800</b><br><b>(3 485 to 4 103)</b>    | <b>7.4</b><br><b>(6.8 to 8.0)</b>       | <b>2.8</b><br><b>(-5.5 to 11.6)</b>                               |
| Antigua and Barbuda                | 2<br>(2 to 2)                              | 2.2<br>(2.1 to 2.4)                     | 7.9<br>(-3.0 to 20.0)                                             |
| The Bahamas                        | 13<br>(12 to 15)                           | 4.1<br>(3.7 to 4.5)                     | 7.9<br>(-3.5 to 20.7)                                             |
| Barbados                           | 13<br>(12 to 14)                           | 2.7<br>(2.5 to 3.0)                     | 9.9<br>(-1.2 to 21.5)                                             |
| Belize                             | 12<br>(11 to 12)                           | 4.5<br>(4.1 to 4.8)                     | 11.4<br>(-2.3 to 24.8)                                            |
| Bermuda                            | 4<br>(3 to 4)                              | 3.0<br>(2.7 to 3.2)                     | -17.7<br>(-26.5 to -8.7)                                          |
| Cuba                               | 2 592<br>(2 341 to 2 852)                  | 12.9<br>(11.6 to 14.2)                  | 12.2<br>(0.4 to 25.2)                                             |
| Dominica                           | 3<br>(3 to 3)                              | 3.3<br>(3.0 to 3.6)                     | 37.0<br>(22.0 to 52.3)                                            |
| Dominican Republic                 | 188<br>(152 to 245)                        | 2.0<br>(1.6 to 2.6)                     | -17.1<br>(-34.3 to 13.9)                                          |
| Grenada                            | 7<br>(7 to 8)                              | 4.3<br>(4.0 to 4.6)                     | -4.6<br>(-13.6 to 5.1)                                            |
| Guyana                             | 40<br>(35 to 45)                           | 7.3<br>(6.5 to 8.2)                     | -2.6<br>(-15.1 to 10.8)                                           |

| Location                            | Mortality (95% UI)                         |                                         |                                                                   |
|-------------------------------------|--------------------------------------------|-----------------------------------------|-------------------------------------------------------------------|
|                                     | 2017 counts                                | 2017 age-standardised rates per 100,000 | Percentage change in age-standardised rates between 1990 and 2017 |
| Haiti                               | 315<br>(223 to 425)                        | 5.6<br>(4.1 to 7.6)                     | -17.1<br>(-32.6 to 2.3)                                           |
| Jamaica                             | 69<br>(57 to 79)                           | 2.2<br>(1.8 to 2.6)                     | 35.0<br>(9.5 to 58.0)                                             |
| Puerto Rico                         | 304<br>(280 to 328)                        | 4.3<br>(3.9 to 4.6)                     | 0.9<br>(-7.6 to 10.0)                                             |
| Saint Lucia                         | 6<br>(6 to 7)                              | 3.2<br>(2.9 to 3.4)                     | -4.6<br>(-13.6 to 5.5)                                            |
| Saint Vincent and the Grenadines    | 7<br>(7 to 8)                              | 5.3<br>(4.8 to 5.7)                     | 24.8<br>(11.9 to 38.9)                                            |
| Suriname                            | 27<br>(24 to 30)                           | 5.2<br>(4.7 to 5.8)                     | 10.5<br>(-3.0 to 23.9)                                            |
| Trinidad and Tobago                 | 54<br>(44 to 64)                           | 3.3<br>(2.8 to 4.0)                     | -26.5<br>(-39.5 to -12.4)                                         |
| Virgin Islands                      | 8<br>(7 to 9)                              | 5.2<br>(4.4 to 5.8)                     | 5.2<br>(-13.8 to 22.4)                                            |
| <b>Central Latin America</b>        | <b>12 069</b><br><b>(11 495 to 12 478)</b> | <b>5.3</b><br><b>(5.0 to 5.4)</b>       | <b>-43.0</b><br><b>(-46.7 to -40.8)</b>                           |
| Colombia                            | 1 808<br>(1 606 to 2 037)                  | 3.4<br>(3.0 to 3.8)                     | -52.6<br>(-58.3 to -46.5)                                         |
| Costa Rica                          | 324<br>(289 to 350)                        | 6.4<br>(5.7 to 7.0)                     | -32.7<br>(-40.5 to -25.7)                                         |
| El Salvador                         | 486<br>(398 to 582)                        | 8.2<br>(6.7 to 9.8)                     | -8.1<br>(-25.8 to 22.2)                                           |
| Guatemala                           | 849<br>(754 to 946)                        | 7.7<br>(6.9 to 8.5)                     | -27.5<br>(-36.1 to -18.8)                                         |
| Honduras                            | 185<br>(139 to 253)                        | 3.0<br>(2.2 to 4.2)                     | -18.5<br>(-42.7 to 15.2)                                          |
| Mexico                              | 6 827<br>(6 405 to 7 016)                  | 6.2<br>(5.8 to 6.4)                     | -43.3<br>(-47.9 to -41.5)                                         |
| Nicaragua                           | 220<br>(190 to 253)                        | 4.7<br>(4.1 to 5.4)                     | -19.2<br>(-30.8 to -2.9)                                          |
| Panama                              | 154<br>(142 to 167)                        | 3.8<br>(3.5 to 4.1)                     | -32.5<br>(-39.0 to -25.6)                                         |
| Venezuela                           | 1 216<br>(1 064 to 1 400)                  | 4.6<br>(4.0 to 5.2)                     | -35.4<br>(-43.9 to -25.6)                                         |
| <b>Tropical Latin America</b>       | <b>17 493</b><br><b>(16 920 to 17 936)</b> | <b>7.9</b><br><b>(7.7 to 8.1)</b>       | <b>-8.2</b><br><b>(-11.8 to -5.2)</b>                             |
| Brazil                              | 17 200<br>(16 626 to 17 651)               | 8.0<br>(7.7 to 8.2)                     | -8.8<br>(-12.5 to -5.8)                                           |
| Paraguay                            | 293<br>(224 to 349)                        | 5.8<br>(4.5 to 7.0)                     | 34.2<br>(1.7 to 69.1)                                             |
| <b>North Africa and Middle East</b> | <b>21 444</b><br><b>(17 796 to 23 324)</b> | <b>4.9</b><br><b>(4.0 to 5.4)</b>       | <b>-19.0</b><br><b>(-28.7 to 5.0)</b>                             |
| <b>North Africa and Middle East</b> | <b>21 444</b><br><b>(17 796 to 23 324)</b> | <b>4.9</b><br><b>(4.0 to 5.4)</b>       | <b>-19.0</b><br><b>(-28.7 to 5.0)</b>                             |
| Afghanistan                         | 2 540<br>(2 091 to 3 098)                  | 13.8<br>(12.0 to 16.0)                  | -20.1<br>(-40.7 to 38.9)                                          |
| Algeria                             | 1 274<br>(1 017 to 1 635)                  | 3.7<br>(3.1 to 4.7)                     | -18.9<br>(-31.9 to 7.1)                                           |
| Bahrain                             | 18<br>(12 to 22)                           | 1.6<br>(1.2 to 2.0)                     | -37.9<br>(-50.1 to -15.4)                                         |
| Egypt                               | 2 750<br>(1 971 to 3 597)                  | 4.4<br>(3.1 to 5.8)                     | -13.5<br>(-31.5 to 10.3)                                          |
| Iran                                | 2 715<br>(2 547 to 3 135)                  | 3.9<br>(3.7 to 4.5)                     | -26.3<br>(-36.1 to -5.2)                                          |
| Iraq                                | 352<br>(308 to 427)                        | 1.3<br>(1.1 to 1.4)                     | -56.9<br>(-69.2 to -34.3)                                         |
| Jordan                              | 165<br>(144 to 192)                        | 2.4<br>(2.1 to 2.8)                     | -34.2<br>(-46.8 to -14.1)                                         |
| Kuwait                              | 94<br>(84 to 105)                          | 2.4<br>(2.1 to 2.6)                     | -23.9<br>(-32.0 to -14.8)                                         |
| Lebanon                             | 304<br>(186 to 496)                        | 5.8<br>(3.6 to 8.8)                     | -25.0<br>(-52.7 to 12.3)                                          |

| Location                                      | Mortality (95% UI)                            |                                         |                                                                   |
|-----------------------------------------------|-----------------------------------------------|-----------------------------------------|-------------------------------------------------------------------|
|                                               | 2017 counts                                   | 2017 age-standardised rates per 100,000 | Percentage change in age-standardised rates between 1990 and 2017 |
| Libya                                         | 239<br>(149 to 325)                           | 4.6<br>(3.0 to 6.2)                     | -15.5<br>(-46.5 to 13.4)                                          |
| Morocco                                       | 1 251<br>(975 to 1 571)                       | 4.1<br>(3.2 to 5.1)                     | -11.3<br>(-28.9 to 16.7)                                          |
| Palestine                                     | 115<br>(82 to 137)                            | 3.5<br>(2.8 to 4.0)                     | -29.9<br>(-43.9 to -11.4)                                         |
| Oman                                          | 75<br>(60 to 93)                              | 3.2<br>(2.5 to 3.9)                     | -26.8<br>(-47.4 to 6.6)                                           |
| Qatar                                         | 78<br>(41 to 108)                             | 3.6<br>(2.6 to 4.6)                     | -25.3<br>(-46.1 to 3.6)                                           |
| Saudi Arabia                                  | 1 785<br>(1 159 to 2 522)                     | 8.8<br>(5.5 to 12.2)                    | -18.4<br>(-52.1 to 33.1)                                          |
| Sudan                                         | 1 199<br>(886 to 1 609)                       | 4.5<br>(3.3 to 6.1)                     | -21.8<br>(-41.9 to 10.4)                                          |
| Syria                                         | 274<br>(218 to 337)                           | 2.1<br>(1.7 to 2.7)                     | -24.1<br>(-41.8 to 3.1)                                           |
| Tunisia                                       | 347<br>(265 to 434)                           | 3.1<br>(2.4 to 3.9)                     | -17.6<br>(-37.2 to 10.0)                                          |
| Turkey                                        | 4 536<br>(3 290 to 5 270)                     | 5.4<br>(3.9 to 6.2)                     | -25.1<br>(-40.6 to 5.8)                                           |
| United Arab Emirates                          | 423<br>(228 to 610)                           | 4.6<br>(3.1 to 6.0)                     | -23.1<br>(-51.1 to 18.4)                                          |
| Yemen                                         | 889<br>(610 to 1 225)                         | 4.9<br>(3.3 to 6.5)                     | -16.1<br>(-40.0 to 42.5)                                          |
| <b>South Asia</b>                             | <b>239 791</b><br><b>(220 244 to 270 634)</b> | <b>22.0</b><br><b>(20.0 to 25.0)</b>    | <b>-2.7</b><br><b>(-19.6 to 20.4)</b>                             |
| <b>South Asia</b>                             | <b>239 791</b><br><b>(220 244 to 270 634)</b> | <b>22.0</b><br><b>(20.0 to 25.0)</b>    | <b>-2.7</b><br><b>(-19.6 to 20.4)</b>                             |
| Bangladesh                                    | 6 304<br>(5 349 to 7 374)                     | 5.9<br>(5.1 to 6.8)                     | -28.9<br>(-48.0 to 0.1)                                           |
| Bhutan                                        | 95<br>(70 to 124)                             | 17.6<br>(13.1 to 22.3)                  | -22.9<br>(-40.3 to 4.6)                                           |
| India                                         | 221 298<br>(201 395 to 251 201)               | 25.4<br>(23.0 to 29.2)                  | -7.4<br>(-23.6 to 15.4)                                           |
| Nepal                                         | 2 911<br>(2 253 to 3 619)                     | 16.4<br>(12.8 to 20.1)                  | -12.5<br>(-29.5 to 13.6)                                          |
| Pakistan                                      | 9 182<br>(6 111 to 11 763)                    | 8.8<br>(6.0 to 11.2)                    | -0.3<br>(-31.3 to 41.4)                                           |
| <b>Southeast Asia, East Asia, and Oceania</b> | <b>193 933</b><br><b>(158 885 to 209 800)</b> | <b>8.9</b><br><b>(7.4 to 9.6)</b>       | <b>-3.8</b><br><b>(-24.8 to 12.1)</b>                             |
| <b>East Asia</b>                              | <b>140 843</b><br><b>(107 347 to 155 273)</b> | <b>8.5</b><br><b>(6.6 to 9.3)</b>       | <b>12.1</b><br><b>(-23.6 to 32.2)</b>                             |
| China                                         | 134 773<br>(102 016 to 148 952)               | 8.6<br>(6.7 to 9.5)                     | 12.8<br>(-23.9 to 33.4)                                           |
| North Korea                                   | 1 757<br>(1 355 to 2 219)                     | 6.7<br>(5.2 to 8.3)                     | 28.5<br>(-5.1 to 68.0)                                            |
| Taiwan (Province of China)                    | 2 045<br>(1 921 to 2 182)                     | 5.7<br>(5.3 to 6.0)                     | -26.7<br>(-31.8 to -21.2)                                         |
| <b>Oceania</b>                                | <b>506</b><br><b>(367 to 661)</b>             | <b>7.5</b><br><b>(6.0 to 9.0)</b>       | <b>12.7</b><br><b>(-7.0 to 33.9)</b>                              |
| American Samoa                                | 2<br>(1 to 2)                                 | 4.8<br>(4.2 to 5.4)                     | 5.7<br>(-13.7 to 29.8)                                            |
| Federated States of Micronesia                | 4<br>(3 to 5)                                 | 6.1<br>(4.7 to 7.4)                     | 11.9<br>(-16.6 to 45.6)                                           |
| Fiji                                          | 21<br>(18 to 24)                              | 3.4<br>(3.0 to 3.9)                     | 7.4<br>(-13.9 to 42.0)                                            |
| Guam                                          | 7<br>(6 to 8)                                 | 4.6<br>(4.0 to 5.2)                     | 26.8<br>(-0.6 to 57.4)                                            |
| Kiribati                                      | 2<br>(1 to 2)                                 | 2.4<br>(1.9 to 2.9)                     | -0.8<br>(-18.0 to 19.4)                                           |
| Marshall Islands                              | 2<br>(1 to 3)                                 | 7.0<br>(5.6 to 8.6)                     | 16.9<br>(-9.0 to 47.1)                                            |
| Northern Mariana Islands                      | 2<br>(2 to 2)                                 | 5.2<br>(4.4 to 5.9)                     | 4.2<br>(-22.9 to 32.0)                                            |

| Location                          | Mortality (95% UI)                         |                                         |                                                                   |
|-----------------------------------|--------------------------------------------|-----------------------------------------|-------------------------------------------------------------------|
|                                   | 2017 counts                                | 2017 age-standardised rates per 100,000 | Percentage change in age-standardised rates between 1990 and 2017 |
| Papua New Guinea                  | 317<br>(193 to 460)                        | 6.5<br>(4.4 to 8.5)                     | 20.3<br>(-11.8 to 51.7)                                           |
| Samoa                             | 7<br>(5 to 8)                              | 5.4<br>(4.2 to 6.7)                     | 24.4<br>(-4.9 to 59.3)                                            |
| Solomon Islands                   | 101<br>(85 to 119)                         | 31.2<br>(27.0 to 35.4)                  | -11.5<br>(-28.5 to 8.1)                                           |
| Tonga                             | 4<br>(3 to 4)                              | 5.3<br>(4.3 to 6.3)                     | -5.8<br>(-29.3 to 23.0)                                           |
| Vanuatu                           | 10<br>(7 to 13)                            | 6.2<br>(4.5 to 8.1)                     | 22.6<br>(-11.6 to 60.4)                                           |
| <b>Southeast Asia</b>             | <b>52 585</b><br><b>(49 148 to 57 098)</b> | <b>10.5</b><br><b>(9.8 to 11.3)</b>     | <b>-29.8</b><br><b>(-39.8 to -13.0)</b>                           |
| Cambodia                          | 1 681<br>(1 452 to 1 944)                  | 17.5<br>(15.3 to 20.1)                  | -6.4<br>(-23.7 to 17.9)                                           |
| Indonesia                         | 18 244<br>(16 924 to 20 366)               | 10.9<br>(10.1 to 12.0)                  | -44.8<br>(-54.6 to -28.5)                                         |
| Laos                              | 406<br>(311 to 508)                        | 9.9<br>(7.7 to 12.4)                    | 5.5<br>(-28.6 to 39.9)                                            |
| Malaysia                          | 831<br>(626 to 978)                        | 3.8<br>(2.9 to 4.5)                     | -18.3<br>(-36.6 to 14.4)                                          |
| Maldives                          | 15<br>(13 to 17)                           | 5.0<br>(4.4 to 5.7)                     | -44.2<br>(-58.7 to -8.6)                                          |
| Mauritius                         | 65<br>(59 to 72)                           | 4.4<br>(3.9 to 4.8)                     | 31.5<br>(17.8 to 45.4)                                            |
| Myanmar                           | 6 872<br>(5 953 to 7 929)                  | 17.4<br>(15.3 to 19.9)                  | -15.7<br>(-32.6 to 7.9)                                           |
| Philippines                       | 3 921<br>(3 478 to 4 411)                  | 6.2<br>(5.5 to 6.9)                     | 57.5<br>(39.7 to 77.6)                                            |
| Sri Lanka                         | 2 147<br>(1 783 to 2 568)                  | 10.4<br>(8.7 to 12.3)                   | -3.3<br>(-27.4 to 24.6)                                           |
| Seychelles                        | 6<br>(5 to 7)                              | 6.2<br>(5.2 to 7.1)                     | -3.6<br>(-21.4 to 13.8)                                           |
| Thailand                          | 3 602<br>(3 161 to 4 143)                  | 4.0<br>(3.5 to 4.6)                     | -50.6<br>(-60.1 to -32.0)                                         |
| Timor-Leste                       | 63<br>(47 to 77)                           | 8.4<br>(6.7 to 10.2)                    | 18.6<br>(-15.9 to 60.4)                                           |
| Vietnam                           | 14 662<br>(12 524 to 17 136)               | 18.0<br>(15.4 to 21.0)                  | -2.7<br>(-26.5 to 29.4)                                           |
| <b>Sub-Saharan Africa</b>         | <b>38 086</b><br><b>(34 089 to 44 273)</b> | <b>9.5</b><br><b>(8.6 to 11.1)</b>      | <b>-14.1</b><br><b>(-24.6 to 0.0)</b>                             |
| <b>Central sub-Saharan Africa</b> | <b>3 387</b><br><b>(2 742 to 4 773)</b>    | <b>7.5</b><br><b>(6.2 to 9.7)</b>       | <b>-8.1</b><br><b>(-23.9 to 13.9)</b>                             |
| Angola                            | 855<br>(677 to 1 174)                      | 9.2<br>(7.3 to 12.3)                    | -10.9<br>(-32.5 to 20.3)                                          |
| Central African Republic          | 146<br>(94 to 249)                         | 7.9<br>(5.9 to 11.2)                    | -10.5<br>(-33.5 to 12.6)                                          |
| Congo (Brazzaville)               | 168<br>(110 to 257)                        | 8.1<br>(5.3 to 12.1)                    | -16.9<br>(-39.9 to 11.8)                                          |
| DR Congo                          | 2 111<br>(1 564 to 3 049)                  | 7.0<br>(5.4 to 9.1)                     | -5.4<br>(-26.2 to 20.5)                                           |
| Equatorial Guinea                 | 33<br>(20 to 53)                           | 7.5<br>(4.8 to 11.8)                    | -18.8<br>(-49.6 to 30.2)                                          |
| Gabon                             | 75<br>(54 to 109)                          | 8.3<br>(6.0 to 11.7)                    | -20.0<br>(-44.2 to 7.5)                                           |
| <b>Eastern sub-Saharan Africa</b> | <b>16 221</b><br><b>(14 760 to 17 956)</b> | <b>12.2</b><br><b>(11.2 to 13.5)</b>    | <b>-16.9</b><br><b>(-28.4 to -2.3)</b>                            |
| Burundi                           | 389<br>(305 to 487)                        | 12.0<br>(9.6 to 14.7)                   | -26.2<br>(-40.8 to -1.1)                                          |
| Comoros                           | 35<br>(28 to 45)                           | 9.6<br>(7.8 to 12.4)                    | -21.4<br>(-38.7 to -0.2)                                          |
| Djibouti                          | 41<br>(29 to 58)                           | 10.0<br>(7.4 to 13.6)                   | -18.1<br>(-40.8 to 8.2)                                           |
| Eritrea                           | 207<br>(153 to 282)                        | 11.6<br>(8.8 to 15.1)                   | -16.4<br>(-37.1 to 10.9)                                          |

| Location                           | Mortality (95% UI)                   |                                         |                                                                   |
|------------------------------------|--------------------------------------|-----------------------------------------|-------------------------------------------------------------------|
|                                    | 2017 counts                          | 2017 age-standardised rates per 100,000 | Percentage change in age-standardised rates between 1990 and 2017 |
| Ethiopia                           | 4 461<br>(3 845 to 5 132)            | 13.1<br>(11.5 to 14.9)                  | -27.5<br>(-42.9 to -3.3)                                          |
| Kenya                              | 2 125<br>(1 898 to 2 485)            | 12.7<br>(11.3 to 14.5)                  | -8.2<br>(-33.4 to 15.7)                                           |
| Madagascar                         | 726<br>(564 to 939)                  | 8.6<br>(6.8 to 10.9)                    | -22.8<br>(-35.3 to -8.1)                                          |
| Malawi                             | 923<br>(797 to 1 077)                | 13.2<br>(11.4 to 15.4)                  | -14.5<br>(-31.2 to 20.0)                                          |
| Mozambique                         | 1 471<br>(1 085 to 1 821)            | 15.5<br>(12.1 to 19.0)                  | -7.4<br>(-29.4 to 25.4)                                           |
| Rwanda                             | 499<br>(404 to 629)                  | 11.1<br>(9.1 to 13.8)                   | -31.8<br>(-46.7 to -5.7)                                          |
| Somalia                            | 500<br>(363 to 694)                  | 10.3<br>(7.8 to 13.6)                   | -10.8<br>(-31.4 to 22.0)                                          |
| South Sudan                        | 346<br>(261 to 466)                  | 10.8<br>(7.9 to 14.4)                   | -10.7<br>(-32.0 to 21.5)                                          |
| Tanzania                           | 2 585<br>(2 240 to 3 029)            | 11.5<br>(9.8 to 13.8)                   | -12.0<br>(-26.8 to 9.2)                                           |
| Uganda                             | 1 094<br>(846 to 1 351)              | 9.3<br>(7.4 to 11.3)                    | -14.5<br>(-39.0 to 16.4)                                          |
| Zambia                             | 811<br>(701 to 933)                  | 14.7<br>(12.7 to 17.0)                  | -18.9<br>(-36.3 to 0.2)                                           |
| <b>Southern sub-Saharan Africa</b> | <b>1 569<br/>(1 461 to 1 796)</b>    | <b>3.1<br/>(2.9 to 3.6)</b>             | <b>-20.6<br/>(-36.9 to -2.0)</b>                                  |
| Botswana                           | 44<br>(34 to 56)                     | 3.7<br>(3.0 to 4.6)                     | -22.2<br>(-40.7 to 5.3)                                           |
| Lesotho                            | 54<br>(41 to 68)                     | 5.1<br>(3.9 to 6.3)                     | -2.1<br>(-35.7 to 38.2)                                           |
| Namibia                            | 57<br>(49 to 68)                     | 4.3<br>(3.7 to 5.1)                     | -23.5<br>(-38.7 to -2.9)                                          |
| South Africa                       | 1 036<br>(933 to 1 186)              | 2.6<br>(2.3 to 2.9)                     | -25.4<br>(-38.9 to -5.1)                                          |
| Swaziland                          | 22<br>(17 to 28)                     | 4.4<br>(3.4 to 5.5)                     | -20.0<br>(-42.2 to 8.5)                                           |
| Zimbabwe                           | 356<br>(262 to 455)                  | 6.7<br>(5.0 to 8.7)                     | 8.0<br>(-22.0 to 34.7)                                            |
| <b>Western sub-Saharan Africa</b>  | <b>16 911<br/>(14 329 to 20 729)</b> | <b>10.2<br/>(8.6 to 12.4)</b>           | <b>-14.4<br/>(-26.5 to 3.3)</b>                                   |
| Benin                              | 411<br>(330 to 501)                  | 9.7<br>(7.9 to 11.8)                    | -19.0<br>(-34.7 to 0.9)                                           |
| Burkina Faso                       | 1 249<br>(1 081 to 1 438)            | 15.7<br>(13.8 to 17.7)                  | -12.7<br>(-25.9 to 6.1)                                           |
| Cameroon                           | 1 164<br>(933 to 1 429)              | 11.8<br>(9.6 to 14.5)                   | -18.0<br>(-34.4 to 1.4)                                           |
| Cape Verde                         | 11<br>(9 to 13)                      | 2.2<br>(1.9 to 2.7)                     | -35.1<br>(-48.2 to -17.3)                                         |
| Chad                               | 592<br>(452 to 792)                  | 11.0<br>(8.1 to 15.2)                   | -1.9<br>(-20.0 to 23.4)                                           |
| Cote d'Ivoire                      | 984<br>(792 to 1 248)                | 11.3<br>(9.1 to 14.2)                   | -12.9<br>(-31.6 to 8.9)                                           |
| The Gambia                         | 129<br>(106 to 155)                  | 15.4<br>(12.9 to 18.3)                  | -2.4<br>(-27.5 to 23.0)                                           |
| Ghana                              | 1 865<br>(1 580 to 2 141)            | 15.0<br>(12.9 to 17.2)                  | 14.0<br>(-10.8 to 49.6)                                           |
| Guinea                             | 554<br>(461 to 661)                  | 11.0<br>(9.1 to 13.1)                   | -9.3<br>(-32.1 to 17.3)                                           |
| Guinea-Bissau                      | 68<br>(55 to 89)                     | 11.2<br>(9.4 to 13.8)                   | -24.5<br>(-39.5 to -5.3)                                          |
| Liberia                            | 152<br>(115 to 193)                  | 8.9<br>(6.9 to 11.0)                    | -26.6<br>(-41.4 to -5.8)                                          |
| Mali                               | 709<br>(546 to 977)                  | 9.1<br>(7.0 to 12.8)                    | -22.8<br>(-36.6 to -2.2)                                          |
| Mauritania                         | 156<br>(121 to 206)                  | 8.8<br>(7.0 to 11.5)                    | -23.6<br>(-39.6 to -1.0)                                          |

| Location              | Mortality (95% UI)        |                                         |                                                                   |
|-----------------------|---------------------------|-----------------------------------------|-------------------------------------------------------------------|
|                       | 2017 counts               | 2017 age-standardised rates per 100,000 | Percentage change in age-standardised rates between 1990 and 2017 |
| Niger                 | 599<br>(430 to 884)       | 9.1<br>(6.4 to 13.7)                    | -22.5<br>(-36.3 to -3.1)                                          |
| Nigeria               | 7 018<br>(5 103 to 9 772) | 8.7<br>(6.3 to 12.1)                    | -21.2<br>(-41.4 to 7.2)                                           |
| Sao Tome and Principe | 14<br>(10 to 19)          | 13.4<br>(8.6 to 18.8)                   | 9.9<br>(-23.5 to 49.1)                                            |
| Senegal               | 662<br>(518 to 805)       | 10.3<br>(8.3 to 12.3)                   | -14.1<br>(-28.4 to 5.1)                                           |
| Sierra Leone          | 323<br>(264 to 400)       | 10.5<br>(8.7 to 12.8)                   | -10.9<br>(-30.5 to 13.9)                                          |
| Togo                  | 252<br>(204 to 316)       | 9.3<br>(7.7 to 11.2)                    | -20.9<br>(-37.9 to -0.3)                                          |
