# Supplementary material for: The global burden of falls: global, regional and national estimates of morbidity and mortality from the Global Burden of Disease Study 2017
Source: PubMed Central journal article supplement (PMC7571347; doi:10.1136/injuryprev-2019-043286), 2020-01-15
Supplement: injuryprev-2019-043286supp005.pdf [file injuryprev-2019-043286supp005.pdf]

Table 3: YLLs, YLDs, and DALYs for 2017 and percentage change of age-standardised rates between 1990 and 2017 by location for falls

| Location                                                | YLLs (95% UI)              |                                         |                                                                   |                            | YLDs (95% UI)                           |                                                                   |                            |                                         | DALYs (95% UI)                                                    |                  |                                         |                                                                   |     |      |
|---------------------------------------------------------|----------------------------|-----------------------------------------|-------------------------------------------------------------------|----------------------------|-----------------------------------------|-------------------------------------------------------------------|----------------------------|-----------------------------------------|-------------------------------------------------------------------|------------------|-----------------------------------------|-------------------------------------------------------------------|-----|------|
|                                                         | 2017 counts                | 2017 age-standardised rates per 100,000 | Percentage change in age-standardised rates between 1990 and 2017 | 2017 counts                | 2017 age-standardised rates per 100,000 | Percentage change in age-standardised rates between 1990 and 2017 | 2017 counts                | 2017 age-standardised rates per 100,000 | Percentage change in age-standardised rates between 1990 and 2017 | 2017 counts      | 2017 age-standardised rates per 100,000 | Percentage change in age-standardised rates between 1990 and 2017 |     |      |
| <b>Global</b>                                           | 16 688 088                 | 217                                     | 18.5                                                              | 19 252 699                 | 243                                     | 9.3                                                               | 35 940 787                 | 459                                     | 16.8                                                              | 51 931 487       | 676                                     | 25.6                                                              |     |      |
| <b>Low SDI</b>                                          | (15 011 897 to 17 336 830) | (136 to 229)                            | (31.7 to 4.7)                                                     | (13 725 429 to 16 440 433) | (173 to 330)                            | (10.7 to 7.9)                                                     | (10 185 695 to 14 903 289) | (88 to 147)                             | (13.5 to 10.4)                                                    | (14 544 044)     | (110 to 160)                            | (12.1 to 17.7)                                                    |     |      |
| <b>Low-middle SDI</b>                                   | (2 776 544 to 3 310 458)   | (295 to 353)                            | (-0.5 to 1.3)                                                     | (2 237 007 to 2 886 036)   | (135 to 247)                            | (7.6 to 12.1)                                                     | (4 178 155 to 5 354 911)   | (208 to 277)                            | (10.8 to 14.0)                                                    | (4 988 567)      | (310 to 410)                            | (12.0 to 17.7)                                                    |     |      |
| <b>Middle SDI</b>                                       | (4 322 097)                | 320                                     | -1.1                                                              | 2 470 809                  | 175                                     | 15.0                                                              | 6 792 906                  | 495                                     | 7.2                                                               | 10 444 565       | 792                                     | 10.8                                                              |     |      |
| <b>High-middle SDI</b>                                  | (8 809 052 to 10 737 961)  | (103 to 163)                            | (16.0 to 4.4)                                                     | (8 785 368 to 10 355 556)  | (127 to 224)                            | (12.0 to 18.3)                                                    | (6 031 272 to 7 657 744)   | (424 to 567)                            | (16.6 to 24.7)                                                    | (8 444 567)      | (576 to 729)                            | (16.6 to 24.7)                                                    |     |      |
| <b>High SDI</b>                                         | (4 783 212)                | 228                                     | -20.3                                                             | 3 184 082                  | 143                                     | 7 967 204                                                         | 372                        | 4.1                                     | 13 170 217                                                        | 170              | 13.8                                    | 16 130 477                                                        | 210 | 13.8 |
| <b>Central Europe, Eastern Europe, and Central Asia</b> | (4 047 237 to 5 182 512)   | (95 to 247)                             | (18.4 to 6.6)                                                     | (2 283 323 to 3 338 877)   | (109 to 193)                            | (16.1 to 26.7)                                                    | (6 753 895 to 9 216 910)   | (317 to 428)                            | (13.0 to 18.9)                                                    | (8 170 428)      | (576 to 729)                            | (13.0 to 18.9)                                                    |     |      |
| <b>Central Asia</b>                                     | (13 998 to 132 416)        | (26 to 149)                             | (60.2 to 40.3)                                                    | (299 878 to 574 794)       | (39 to 658)                             | (4.2 to 9.2)                                                      | (417 563 to 695 466)       | (65 to 792)                             | (26.5 to 19.2)                                                    | (475 625)        | (65 to 792)                             | (26.5 to 19.2)                                                    |     |      |
| <b>Armenia</b>                                          | (2 276 to 2 433)           | (4 to 74)                               | (79.0 to 74.2)                                                    | (1 540 to 22 780)          | (20 to 630)                             | (28.0 to 22.0)                                                    | (13 784 to 25 043)         | (390 to 630)                            | (37.0 to 37.0)                                                    | (390 to 630)     | (390 to 630)                            | (37.0 to 37.0)                                                    |     |      |
| <b>Azerbaijan</b>                                       | (9 170 to 10 408)          | (18 to 160)                             | (59.6 to 12.8)                                                    | (5 164 to 68 858)          | (470 to 445)                            | (10.2 to 2.3)                                                     | (45 580 to 78 483)         | (439 to 757)                            | (24.8 to 2.8)                                                     | (439 to 757)     | (439 to 757)                            | (24.8 to 2.8)                                                     |     |      |
| <b>Georgia</b>                                          | (6 504 to 75 513)          | (164 to 177)                            | (46.2 to 32.2)                                                    | (14 874 to 26 703)         | (312 to 204)                            | (22.6 to 18.7)                                                    | (21 907 to 35 556)         | (60 to 67)                              | (10.5 to 12.1)                                                    | (60 to 67)       | (60 to 67)                              | (10.5 to 12.1)                                                    |     |      |
| <b>Kazakhstan</b>                                       | (9 140 to 36 156)          | (158 to 196)                            | (37.9 to 27.0)                                                    | (6 939 to 124 290)         | (352 to 689)                            | (12.4 to 6.1)                                                     | (95 768 to 157 445)        | (541 to 866)                            | (18.9 to 17.1)                                                    | (541 to 866)     | (541 to 866)                            | (18.9 to 17.1)                                                    |     |      |
| <b>Kyrgyzstan</b>                                       | (5 361 to 6 546)           | (89 to 106)                             | (75.2 to 69.3)                                                    | (17 964 to 34 850)         | (316 to 609)                            | (28.3 to 23.6)                                                    | (24 081 to 40 499)         | (564 to 704)                            | (47.4 to 38.7)                                                    | (564 to 704)     | (564 to 704)                            | (47.4 to 38.7)                                                    |     |      |
| <b>Mongolia</b>                                         | (2 881 to 3 249)           | (20 to 35)                              | (29.1 to 25.4)                                                    | (11 553 to 25 831)         | (450 to 851)                            | (3.5 to 3.9)                                                      | (22 486 to 36 248)         | (712 to 1 158)                          | (11.1 to 10.0)                                                    | (712 to 1 158)   | (712 to 1 158)                          | (11.1 to 10.0)                                                    |     |      |
| <b>Tajikistan</b>                                       | (18 110 to 21 166)         | (176 to 221)                            | (50.9 to 35.5)                                                    | (28 510 to 34 777)         | (378 to 728)                            | (19.7 to 14.4)                                                    | (44 640 to 70 204)         | (108 to 387)                            | (23.5 to 16.3)                                                    | (108 to 387)     | (108 to 387)                            | (23.5 to 16.3)                                                    |     |      |
| <b>Turkmenistan</b>                                     | (4 608 to 5 277)           | (30 to 106)                             | (6.7 to 41.9)                                                     | (15 372 to 30 456)         | (332 to 451)                            | (10.0 to 3.3)                                                     | (20 143 to 34 644)         | (424 to 736)                            | (13.5 to 11.9)                                                    | (424 to 736)     | (424 to 736)                            | (13.5 to 11.9)                                                    |     |      |
| <b>Uzbekistan</b>                                       | (2 880 to 36 136)          | (93 to 119)                             | (59.6 to 46.5)                                                    | (44 995 to 185 084)        | (320 to 621)                            | (11.9 to 5.4)                                                     | (27 974 to 217 536)        | (427 to 724)                            | (27.5 to 18.2)                                                    | (427 to 724)     | (427 to 724)                            | (27.5 to 18.2)                                                    |     |      |
| <b>Central Europe</b>                                   | (209 898)                  | 159                                     | -4.9                                                              | 1 623 449                  | 1 015                                   | -10.6                                                             | 1 893 234                  | 1 174                                   | -1.4                                                              | 2 174 584        | 1 474                                   | -1.4                                                              |     |      |
| <b>Albania</b>                                          | (1 602 to 2 623)           | (69 to 85)                              | (-1.7 to 0.0)                                                     | (21 820 to 60 606)         | (632 to 245)                            | (8.0 to 13.1)                                                     | (23 540 to 59 598)         | (965 to 1 316)                          | (6.6 to 5.8)                                                      | (965 to 1 316)   | (965 to 1 316)                          | (6.6 to 5.8)                                                      |     |      |
| <b>Bosnia and Herzegovina</b>                           | (2 589 to 2 903)           | (48 to 61)                              | (-0.8 to 1.8)                                                     | (28 870 to 46 486)         | (404 to 267)                            | (8.4 to 13.2)                                                     | (34 409 to 59 203)         | (531 to 811)                            | (8.0 to 10.7)                                                     | (531 to 811)     | (531 to 811)                            | (8.0 to 10.7)                                                     |     |      |
| <b>Bulgaria</b>                                         | (11 006 to 14 047)         | (131 to 156)                            | (44.1 to 32.9)                                                    | (66 595 to 131 476)        | (653 to 1 283)                          | (14.0 to 9.5)                                                     | (79 183 to 144 455)        | (1 104 to 1 319)                        | (7.6 to 10.4)                                                     | (1 104 to 1 319) | (1 104 to 1 319)                        | (7.6 to 10.4)                                                     |     |      |
| <b>Croatia</b>                                          | (14 195 to 15 147)         | (117 to 185)                            | (9.8 to 15.4)                                                     | (53 864 to 101 046)        | (550 to 1 069)                          | (8.3 to 12.2)                                                     | (50 919 to 85 858)         | (732 to 1 216)                          | (7.7 to 7.7)                                                      | (732 to 1 216)   | (732 to 1 216)                          | (7.7 to 7.7)                                                      |     |      |
| <b>Czech Republic</b>                                   | (20 110 to 21 408)         | (161 to 186)                            | (-0.8 to 4.9)                                                     | (173 350 to 248 115)       | (843 to 1 455)                          | (4.6 to 2.4)                                                      | (146 807 to 205 567)       | (968 to 1 770)                          | (12.6 to 10.8)                                                    | (968 to 1 770)   | (968 to 1 770)                          | (12.6 to 10.8)                                                    |     |      |
| <b>Hungary</b>                                          | (26 210 to 29 231)         | (161 to 171)                            | (-0.3 to 1.0)                                                     | (102 380 to 200 260)       | (720 to 1 422)                          | (7.2 to 16.3)                                                     | (130 172 to 227 092)       | (1 084 to 1 578)                        | (13.0 to 17.8)                                                    | (1 084 to 1 578) | (1 084 to 1 578)                        | (13.0 to 17.8)                                                    |     |      |
| <b>Macedonia</b>                                        | (1 624 to 1 393)           | (80 to 80)                              | (20.0 to 50.5)                                                    | (17 272 to 35 053)         | (464 to 1 269)                          | (8.6 to 16.7)                                                     | (19 675 to 36 957)         | (718 to 1 343)                          | (7.0 to 17.1)                                                     | (718 to 1 343)   | (718 to 1 343)                          | (7.0 to 17.1)                                                     |     |      |
| <b>Montenegro</b>                                       | (486 to 668)               | (59 to 82)                              | (39.9 to 12.6)                                                    | (5 177 to 9 941)           | (643 to 1 274)                          | (11.2 to 15.9)                                                    | (5 650 to 10 339)          | (707 to 1 344)                          | (6.6 to 12.4)                                                     | (707 to 1 344)   | (707 to 1 344)                          | (6.6 to 12.4)                                                     |     |      |
| <b>Poland</b>                                           | (105 048 to 119 222)       | (174 to 203)                            | (40.1 to 29.1)                                                    | (895 305 to 1 744 899)     | (740 to 1 455)                          | (10.7 to 4.5)                                                     | (699 230 to 979 265)       | (929 to 1 611)                          | (11.6 to 9.8)                                                     | (929 to 1 611)   | (929 to 1 611)                          | (11.6 to 9.8)                                                     |     |      |
| <b>Romania</b>                                          | (46 311 to 49 665)         | (150 to 193)                            | (53.5 to 48.4)                                                    | (186 496 to 367 238)       | (881 to 1 350)                          | (28.9 to 23.4)                                                    | (232 675 to 412 927)       | (865 to 1 528)                          | (13.0 to 14.4)                                                    | (865 to 1 528)   | (865 to 1 528)                          | (13.0 to 14.4)                                                    |     |      |
| <b>Serbia</b>                                           | (8 756 to 12 191)          | (66 to 82)                              | (75.0 to 147 982)                                                 | (642 to 1 264)             | (108 to 174)                            | (8.5 to 15.9)                                                     | (85 851 to 159 741)        | (724 to 1 354)                          | (6.6 to 14.9)                                                     | (724 to 1 354)   | (724 to 1 354)                          | (6.6 to 14.9)                                                     |     |      |
| <b>Slovakia</b>                                         | (15 786 to 18 267)         | (208 to 241)                            | (55.0 to 19.5)                                                    | (77 917 to 159 045)        | (753 to 1 480)                          | (14.4 to 10.2)                                                    | (70 102 to 124 808)        | (952 to 1 600)                          | (9.2 to 16.0)                                                     | (952 to 1 600)   | (952 to 1 600)                          | (9.2 to 16.0)                                                     |     |      |
| <b>Slovenia</b>                                         | (6 895 to 7 444)           | (81 to 136)                             | (50.0 to 40.1)                                                    | (38 110 to 48 481)         | (908 to 1 788)                          | (11.6 to 6.1)                                                     | (35 179 to 61 455)         | (1 088 to 1 948)                        | (10.1 to 14.4)                                                    | (1 088 to 1 948) | (1 088 to 1 948)                        | (10.1 to 14.4)                                                    |     |      |
| <b>Eastern Europe</b>                                   | (549 137 to 596 079)       | (230 to 240)                            | (12.6 to 8.3)                                                     | (2 388 116 to 2 749 579)   | (514 to 1 013)                          | (5.2 to 6.4)                                                      | (1 966 184 to 3 161 952)   | (740 to 1 245)                          | (4.6 to 2.2)                                                      | (2 174 584)      | (740 to 1 245)                          | (4.6 to 2.2)                                                      |     |      |
| <b>Belarus</b>                                          | (27 689 to 34 297)         | (237 to 293)                            | (21.5 to 1.1)                                                     | (66 861 to 131 733)        | (533 to 1 047)                          | (7.5 to 2.4)                                                      | (88 270 to 162 801)        | (803 to 1 311)                          | (9.9 to 3.5)                                                      | (803 to 1 311)   | (803 to 1 311)                          | (9.9 to 3.5)                                                      |     |      |
| <b>Estonia</b>                                          | (2975 to 3 489)            | (145 to 181)                            | (46.5 to 20.0)                                                    | (15 167 to 18 546)         | (516 to 1 016)                          | (23.1 to 20.5)                                                    | (12 310 to 21 395)         | (668 to 1 187)                          | (13.2 to 19.9)                                                    | (668 to 1 187)   | (668 to 1 187)                          | (13.2 to 19.9)                                                    |     |      |
| <b>Latvia</b>                                           | (6 029 to 6 893)           | (96 to 126)                             | (43.4 to 45.8)                                                    | (14 724 to 28 890)         | (527 to 1 046)                          | (26.0 to 21.2)                                                    | (20 778 to 34 581)         | (758 to 1 260)                          | (13.2 to 29.8)                                                    | (758 to 1 260)   | (758 to 1 260)                          | (13.2 to 29.8)                                                    |     |      |
| <b>Lithuania</b>                                        | (10 646 to 12 561)         | (134 to 144)                            | (38.9 to 26.4)                                                    | (27 682 to 46 493)         | (568 to 1 201)                          | (12.7 to 7.8)                                                     | (35 135 to 57 887)         | (855 to 1 402)                          | (13.2 to 14.4)                                                    | (855 to 1 402)   | (855 to 1 402)                          | (13.2 to 14.4)                                                    |     |      |
| <b>Moldova</b>                                          | (719 to 892)               | (59 to 85)                              | (56.4 to 47.8)                                                    | (21 916 to 42 377)         | (473 to 912)                            | (32.3 to 17.0)                                                    | (29 724 to 50 146)         | (640 to 1 081)                          | (33.3 to 26.4)                                                    | (640 to 1 081)   | (640 to 1 081)                          | (33.3 to 26.4)                                                    |     |      |
| <b>Russian Federation</b>                               | (278 233 to 405 484)       | (230 to 265)                            | (-1.2 to 0.3)                                                     | (866 500 to 1 066 872)     | (519 to 1 033)                          | (0.2 to 5.1)                                                      | (1 360 262 to 2 07 059)    | (727 to 1 252)                          | (10.0 to 7.1)                                                     | (727 to 1 252)   | (727 to 1 252)                          | (10.0 to 7.1)                                                     |     |      |
| <b>Ukraine</b>                                          | (11 893 to 132 443)        | (215 to 257)                            | (30.8 to 16.9)                                                    | (289 234 to 575 717)       | (493 to 979)                            | (15.6 to 10.5)                                                    | (404 488 to 698 091)       | (718 to 1 216)                          | (14.2 to 11.2)                                                    | (718 to 1 216)   | (718 to 1 216)                          | (14.2 to 11.2)                                                    |     |      |
| <b>High-income</b>                                      | (1 905 180 to 1 749 551)   | (86 to 86)                              | (-28.8 to 24.4)                                                   | (6 340 893 to 9 855 891)   | (272 to 279)                            | (10.2 to 6.9)                                                     | (6 876 493 to 9 549 549)   | (1 680 to 2 200)                        | (13.6 to 13.2)                                                    | (1 680 to 2 200) | (1 680 to 2 200)                        | (13.6 to 13.2)                                                    |     |      |
| <b>Australia</b>                                        | (87 201 to 44 017)         | (82 to 77)                              | (4.6 to 14.3)                                                     | (1 843 830 to 2 323 285)   | (102 to 994)                            | (20.7 to 25.4)                                                    | (2 295 302 to 4 001 819)   | (530 to 1 081)                          | (17.9 to 23.2)                                                    | (530 to 1 081)   | (530 to 1 081)                          | (17.9 to 23.2)                                                    |     |      |
| <b>Australia</b>                                        | (34 091 to 37 409)         | (88 to 92)                              | (-10.7 to 1.1)                                                    | (21 068 to 30 646)         | (483 to 866)                            | (21.7 to 27.0)                                                    | (24 819 to 35 409)         | (781 to 1 051)                          | (21.0 to 25.3)                                                    | (781 to 1 051)   | (781 to 1 051)                          | (21.0 to 25.3)                                                    |     |      |
| <b>New Zealand</b>                                      | (6 429 to 6 899)           | (97 to 104)                             | (21.1 to 8.5)                                                     | (33 598 to 56 562)         | (800 to 1 142)                          | (14.7 to 24.4)                                                    | (40 044 to 71 798)         | (677 to 1 238)                          | (9.9 to 18.8)                                                     | (677 to 1 238)   | (677 to 1 238)                          | (9.9 to 18.8)                                                     |     |      |
| <b>High-income Asia Pacific</b>                         | (238 005 to 248 489)       | (89 to 78)                              | (46.3 to 38.7)                                                    | (931 659 to 1 779 010)     | (341 to 544)                            | (8.5 to 12.8)                                                     | (1 124 479 to 2 016 435)   | (4 610 to 729)                          | (5.6 to 1.8)                                                      | (4 610 to 729)   | (4 610 to 729)                          | (5.6 to 1.8)                                                      |     |      |
| <b>Brunei</b>                                           | (613 to 824)               | (152 to 196)                            | (28.4 to 2.0)                                                     | (1 370 to 2 707)           | (328 to 653)                            | (3.7 to 2.3)                                                      | (2 076 to 3 618)           | (498 to 815)                            | (11.6 to 10.7)                                                    | (498 to 815)     | (498 to 815)                            | (11.6 to 10.7)                                                    |     |      |
| <b>Japan</b>                                            | (146 776 to 161 071)       | (60 to 60)                              | (-0.3 to 0.6)                                                     | (599 975 to 849 553)       | (266 to 594)                            | (23.6 to 19.1)                                                    | (862 376 to 1 509 191)     | (627 to 756)                            | (10.7 to 10.7)                                                    | (627 to 756)     | (627 to 756)                            | (10.7 to 10.7)                                                    |     |      |
| <b>South Korea</b>                                      | (76 952 to 84 788)         | (108 to 118)                            | (-0.4 to 1.0)                                                     | (283 072 to 391 660)       | (293 to 577)                            | (21.8 to 16.4)                                                    | (278 714 to 467 156)       | (405 to 888)                            | (13.6 to 17.0)                                                    | (405 to 888)     | (405 to 888)                            | (13.6 to 17.0)                                                    |     |      |
| <b>Singapore</b>                                        | (3 901 to 4 700)           | (30 to 36)                              | (-0.3 to 1.8)                                                     | (19 951 to 31 911)         | (300 to 600)                            | (1.5 to 9.1)                                                      | (21 144 to 43 077)         | (316 to 670)                            | (9.6 to 1.9)                                                      | (316 to 670)     | (316 to 670)                            | (9.6 to 1.9)                                                      |     |      |
| <b>High-income North America</b>                        | (64 935 to 65 136)         | (106 to 112)                            | (18.2 to 25.7)                                                    | (1 116 030 to 1 339 319)   | (221 to 1 199)                          | (33.9 to 24.9)                                                    | (1 712 659 to 2 746 243)   | (332 to 530)                            | (25.3 to 16.9)                                                    | (332 to 530)     | (332 to 530)                            | (25.3 to 16.9)                                                    |     |      |
| <b>Canada</b>                                           | (6 195 to 71 889)          | (108 to 116)                            | (-1.7 to 1.5)                                                     | (11 899 to 16 847)         | (710 to 1 119)                          | (6.5 to 10.9)                                                     | (17 785 to 35 045)         | (276 to 518)                            | (6.0 to 10.7)                                                     | (276 to 518)     | (276 to 518)                            | (6.0 to 10.7)                                                     |     |      |
| <b>Greenland</b>                                        | (1 720 to 214)             | (27 to 37)                              | (4.8 to 15.5)                                                     | (204 to 349)               | (280 to 340)                            | (3.3 to 29.2)                                                     | (188 to 342)               | (106 to 854)                            | (18.2 to 29.0)                                                    | (106 to 854)     | (106 to 854)                            | (18.2 to 29.0)                                                    |     |      |
| <b>USA</b>                                              | (51 843 to 54 456)         | (106 to 112)                            | (19.6 to 27.6)                                                    | (1 005 152 to 1 926 893)   | (221 to 222)                            | (36.4 to 27.2)                                                    | (1 535 647 to 2 465 015)   | (333 to 532)                            | (27.6 to 17.9)                                                    | (333 to 532)     | (333 to 532)                            | (27.6 to 17.9)                                                    |     |      |
| <b>Latin America</b>                                    | (6 848 to 64 649)          | (78 to 87)                              | (37.0 to 24.3)                                                    | (22 284 to 308 056)        | (404 to 1 617)                          | (18.0 to 38.4)                                                    | (21 500 to 365 468)        | (293 to 495)                            | (13.0 to 16.1)                                                    | (293 to 495)     | (293 to 495)                            | (13.0 to 16.1)                                                    |     |      |
| <b>Argentina</b>                                        | (29 309 to 37 307)         | (68 to 76)                              | (-0.5 to 21.4)                                                    | (107 703 to 208 266)       | (212 to 320)                            | (15.0 to 6.6)                                                     | (40 241 to 100 554)        | (293 to 495)                            | (13.0 to 16.1)                                                    | (293 to 495)     | (293 to 495)                            | (13.0 to 16.1)                                                    |     |      |
| <b>Chile</b>                                            | (23 363 to 25 050)         | (106 to 112)                            | (26.0 to 6.7)                                                     | (41 185 to 100 108)        | (196 to 381)                            | (28.8 to 22.5)                                                    | (62 877 to 101 891)        | (289 to 486)                            | (12.0 to 15.7)                                                    | (289 to 486)     | (289 to 486)                            | (12.0 to 15.7)                                                    |     |      |
| <b>Uruguay</b>                                          | (6 140 to 4 575)           | (80 to 102)                             | (32.5 to 12.1)                                                    | (21 401 to 18              |                                         |                                                                   |                            |                                         |                                                                   |                  |                                         |                                                                   |     |      |

| Location                         | YLLs (95% UI)           |                                         |                                                                   | YLDs (95% UI)       |                                         |                                                                   | DALYs (95% UI)        |                                         |                                                                   |
|----------------------------------|-------------------------|-----------------------------------------|-------------------------------------------------------------------|---------------------|-----------------------------------------|-------------------------------------------------------------------|-----------------------|-----------------------------------------|-------------------------------------------------------------------|
|                                  | 2017 counts             | 2017 age-standardised rates per 100,000 | Percentage change in age-standardised rates between 1990 and 2017 | 2017 counts         | 2017 age-standardised rates per 100,000 | Percentage change in age-standardised rates between 1990 and 2017 | 2017 counts           | 2017 age-standardised rates per 100,000 | Percentage change in age-standardised rates between 1990 and 2017 |
| United Kingdom                   | 91 475                  | 91                                      | 6.6                                                               | 358 687             | 358                                     | 16.1                                                              | 458 163               | 457                                     | 11.1                                                              |
| Latin America and Caribbean      | 831 990                 | 832                                     | 3.4                                                               | 2 544 001 (495 507) | 2 544                                   | 286 (26 to 561)                                                   | 3 375 (503 849)       | 337                                     | 24.4                                                              |
| Andean Latin America             | 64 005 (31 363 853 332) | 64                                      | 14.0 (4.0 to 14.8)                                                | 893 099 (1 158 404) | 893                                     | 151 (2 to 233)                                                    | 1 728 233 (2 486 729) | 173                                     | 14.2 (5.0 to 5.0)                                                 |
| Bolivia                          | 15 971                  | 157                                     | -32.0                                                             | 16 734              | 171                                     | 3.5                                                               | 32 705                | 328                                     | -17.1                                                             |
| Ecuador                          | 28 705                  | 179                                     | -24.9                                                             | 29 188              | 186                                     | 5.7                                                               | 57 893                | 365                                     | -15.7                                                             |
| Peru                             | 25 462 (32 280)         | 159 (201)                               | -33.3 (15.3)                                                      | 20 843 (39 978)     | 136                                     | 13.8                                                              | 48 905 (68 161)       | 308                                     | 12.1 (20.9)                                                       |
| Caribbean                        | 21 118 (35 151)         | 166 (109)                               | 44.8 (11.6)                                                       | 15 701 (67 959)     | 112                                     | 21.2 (7.1 to 20.3)                                                | 61 448 (97 774)       | 102                                     | 30.5 (15.8 to 14.7)                                               |
| Antigua and Barbuda              | 41                      | 45                                      | 3.6                                                               | 43                  | 46                                      | 22.1                                                              | 44                    | 45                                      | 2.3                                                               |
| Belize                           | 187                     | 99                                      | 9.9                                                               | 111                 | 57                                      | 37.4                                                              | 83                    | 258                                     | 20.9                                                              |
| The Bahamas                      | 335                     | 85                                      | 2.8                                                               | 354                 | 84                                      | 22.5                                                              | 870                   | 229                                     | 14.3                                                              |
| Barbados                         | 285 (349)               | 77 (93)                                 | -8.1 (15.6)                                                       | 394 (760)           | 102 (197)                               | 18.6 (26.5)                                                       | 702 (1 090)           | 186 (285)                               | 10.2 (20.2)                                                       |
| Bahamas                          | 187                     | 45                                      | 2.7                                                               | 143                 | 37                                      | 7.0                                                               | 182                   | 211                                     | 11.1                                                              |
| Belize                           | 171 (205)               | 81 (50)                                 | -17.6 (13.7)                                                      | 186 (744)           | 87 (187)                                | 23.5 (33.6)                                                       | 570 (932)             | 143 (233)                               | 15.3 (26.5)                                                       |
| Belize                           | 282 (350)               | 92 (107)                                | 6.9 (9.1)                                                         | 367 (689)           | 132 (210)                               | 32.8 (42.0)                                                       | 691 (1 030)           | 212 (309)                               | 27.9 (37.4)                                                       |
| Bermuda                          | 54                      | 52                                      | -28.6                                                             | 143                 | 144                                     | 18.7                                                              | 197                   | 197                                     | 0.9                                                               |
| Cuba                             | 25 784                  | 187                                     | 3.6                                                               | 29 238              | 180                                     | 3.6                                                               | 62 022                | 366                                     | 10.2                                                              |
| Dominica                         | 61                      | 61                                      | 45.8                                                              | 118                 | 37.5                                    | 14.3 (10.2 to 21.9)                                               | 181                   | 224                                     | 24.4                                                              |
| Dominican Republic               | 485                     | 139                                     | 10.2 (6.0)                                                        | 84 (161)            | 101 (197)                               | 12.7 (4.0 to 23.3)                                                | 146 (233)             | 181 (274)                               | 15.5 (17.1)                                                       |
| Grenada                          | 125                     | 90                                      | -10.4                                                             | 208                 | 156                                     | 29.6                                                              | 332                   | 245                                     | 11.4                                                              |
| Guyana                           | 1 099                   | 166                                     | 1.9                                                               | 1 340               | 169                                     | 2.6                                                               | 2 400                 | 335                                     | 10.9                                                              |
| Haiti                            | 90 (10 263)             | 118 (18)                                | -17.4 (1.3)                                                       | 131 (31)            | 150 (27)                                | 23.0 (32.8)                                                       | 1 860 (2 639)         | 281 (395)                               | 15.5 (19.7)                                                       |
| Jamaica                          | 1 549                   | 118                                     | -27.4                                                             | 1 346               | 150                                     | 22.1                                                              | 2 415                 | 291                                     | 2.9                                                               |
| Puerto Rico                      | 5 273                   | 96                                      | 0.2                                                               | 9 617               | 172                                     | 29.9                                                              | 14 890                | 269                                     | 17.4                                                              |
| Saint Lucia                      | 125                     | 64                                      | 5.1                                                               | 281                 | 141                                     | 26.5                                                              | 406                   | 258                                     | 14.7                                                              |
| Saint Vincent and the Grenadines | 166                     | 100                                     | 1.0                                                               | 164                 | 100                                     | 22.0 (31.7)                                                       | 164                   | 100                                     | 0.0                                                               |
| Suriname                         | 599                     | 100                                     | 1.5                                                               | 1 460               | 162                                     | 30.8                                                              | 1 539                 | 200                                     | 20.0                                                              |
| Trinidad and Tobago              | 1 492                   | 99                                      | -15.7                                                             | 2 512               | 153                                     | 18.1                                                              | 4 003                 | 252                                     | 10.0                                                              |
| Virgin Islands                   | 149                     | 149                                     | 1.1                                                               | 194                 | 194                                     | 4.1                                                               | 264                   | 264                                     | 0.0                                                               |
| Central Latin America            | 111 994                 | 112                                     | -45.5                                                             | 432 429             | 432                                     | 17.8                                                              | 744 415               | 744                                     | 38.5                                                              |
| Colombia                         | 50 427                  | 81 (11)                                 | -58.1 (4.3)                                                       | 63 701              | 81 (10)                                 | -36.8                                                             | 119 313               | 210                                     | 27.7                                                              |
| Costa Rica                       | 5 817                   | 118                                     | -23.0                                                             | 6 682               | 136                                     | 2.5                                                               | 12 499                | 254                                     | -11.2                                                             |
| El Salvador                      | 10 758                  | 169                                     | -10.5                                                             | 13 864              | 142                                     | 1.0                                                               | 19 912                | 242                                     | 19.8                                                              |
| Guatemala                        | 22 385 (28 548)         | 187 (25)                                | -24.9 (2.5)                                                       | 18 652 (24 266)     | 147 (20)                                | -4.9 (6.4 to 1.2)                                                 | 44 607 (62 302)       | 336 (485)                               | 23.6 (30.8)                                                       |
| Honduras                         | 5 772                   | 92                                      | -32.0                                                             | 10 016              | 112                                     | 11.2                                                              | 15 668                | 209                                     | 17.4                                                              |
| Mexico                           | 173 248                 | 143                                     | -47.2                                                             | 272 504             | 228                                     | 3.8                                                               | 445 752               | 371                                     | 24.4                                                              |
| Nicaragua                        | 162 (270 178 651)       | 100 (148)                               | -51.6 (45.3)                                                      | 195 (393 744)       | 162 (200)                               | -0.8 (20.0)                                                       | 369 (909 354 629)     | 308 (440)                               | -29.8 (9.8)                                                       |
| Panama                           | 933                     | 100                                     | -1.0                                                              | 942                 | 100                                     | 4.1                                                               | 1 170                 | 100                                     | 0.0                                                               |
| Venezuela                        | 31 692                  | 107                                     | -98.5                                                             | 40 194              | 100                                     | -0.1                                                              | 86 614 (14 202)       | 181 (266)                               | -21.8 (5.4)                                                       |
| Tropical Latin America           | 384 951                 | 170                                     | -23.2                                                             | 633 580             | 170                                     | 33.2                                                              | 1 018 530             | 440                                     | 30.8                                                              |
| Brazil                           | 376 576                 | 111                                     | 3.4                                                               | 459 786             | 111                                     | 3.4                                                               | 599 144               | 111                                     | 3.4                                                               |
| Paraguay                         | 863 (2 440 389 881)     | 100 (148)                               | -27.9 (20.5)                                                      | 148 870 (827 987)   | 100 (136)                               | -39.1                                                             | 829 821 (1 200 599)   | 100 (136)                               | -39.1                                                             |
| North Africa and Middle East     | 845 778                 | 151                                     | -28.4                                                             | 891 722             | 151                                     | -11.6                                                             | 1 736 900             | 315                                     | -21.1                                                             |
| North Africa and Middle East     | 485 178                 | 151                                     | -28.4                                                             | 891 722             | 151                                     | -11.6                                                             | 1 736 900             | 315                                     | -21.1                                                             |
| Algeria                          | 155 178                 | 151                                     | -28.4                                                             | 891 722             | 151                                     | -11.6                                                             | 1 736 900             | 315                                     | -21.1                                                             |
| Bahrain                          | 721                     | 96                                      | 46.6                                                              | 7 483               | 158                                     | 4.1                                                               | 3 204                 | 206                                     | -14.3                                                             |
| Egypt                            | 124 914                 | 142                                     | -26.4                                                             | 122 849             | 142                                     | 9.8                                                               | 247 765               | 291                                     | -18.7                                                             |
| Iran                             | 92 504 (136 122)        | 100 (148)                               | -41.7 (10.3)                                                      | 86 980 (167 786)    | 100 (148)                               | -5.1 (14.2)                                                       | 136 400 (200 405)     | 228 (354)                               | -29.0 (4.0)                                                       |
| Iraq                             | 36 728                  | 127                                     | -29.5                                                             | 139 110             | 148                                     | 7.8                                                               | 235 814               | 292                                     | 25.2                                                              |
| Israel                           | 86 700 (133 091)        | 100 (142)                               | -48.4 (18.5)                                                      | 88 188 (150 417)    | 112 (137)                               | -11.9 (8.8)                                                       | 130 975 (230 941)     | 168 (339)                               | -31.6 (11.8)                                                      |
| Jordan                           | 13 236 (20 327)         | 135 (20)                                | -35.0                                                             | 143 (26 640)        | 121 (25)                                | -17.0 (20.8)                                                      | 187 (34 954)          | 161 (264)                               | -31.9 (10.4)                                                      |
| Kuwait                           | 7870                    | 79                                      | 43.4                                                              | 12 727              | 121                                     | 11.5                                                              | 20 597                | 219                                     | -26.5                                                             |
| Lebanon                          | 4 806                   | 91                                      | -28.8                                                             | 7 644               | 83                                      | 7.4                                                               | 11 962                | 271                                     | -16.6                                                             |
| Libya                            | 3 885 (4 365)           | 100 (10)                                | -33.3 (20.2)                                                      | 5 399 (10 630)      | 100 (127)                               | -14.9 (9.3)                                                       | 8 667 (14 896)        | 133 (237)                               | -20.8 (10.7)                                                      |
| Morocco                          | 10 746 (13 107)         | 117 (17)                                | -22.0                                                             | 51 585              | 153                                     | 6.1                                                               | 100 168               | 280                                     | -14.4                                                             |
| Palestine                        | 6 506                   | 123                                     | -36.9                                                             | 6 143               | 119                                     | -1.3                                                              | 11 749                | 282                                     | -20.8                                                             |
| Oman                             | 3 164                   | 91                                      | -28.8                                                             | 6 211               | 150                                     | 7.4                                                               | 11 914                | 291                                     | -26.5                                                             |
| Qatar                            | 2 775 (4 059)           | 100 (10)                                | -33.3 (20.2)                                                      | 4 386 (10 630)      | 100 (127)                               | -14.9 (9.3)                                                       | 8 667 (14 896)        | 133 (237)                               | -20.8 (10.7)                                                      |
| Saudi Arabia                     | 1 193                   | 27                                      | -24.3                                                             | 60 333              | 241                                     | 22.1                                                              | 131 255               | 438                                     | -23.3                                                             |
| Sudan                            | 62 630                  | 160                                     | -31.7                                                             | 55 604              | 181                                     | -1.5                                                              | 118 234               | 341                                     | -38.5                                                             |
| Syria                            | 10 615                  | 100                                     | -30.2                                                             | 23 828              | 145                                     | 20.9                                                              | 34 234                | 209                                     | -38.8                                                             |
| Tunisia                          | 8 353 (12 594)          | 100 (148)                               | -46.6 (5.9)                                                       | 16 805 (32 947)     | 100 (148)                               | -0.3 (10.8)                                                       | 26 743 (43 333)       | 163 (265)                               | -18.5 (15.5)                                                      |
| Turkey                           | 10 387                  | 88                                      | -21.7                                                             | 18 078              | 100                                     | 9.3                                                               | 28 236                | 236                                     | -19.9                                                             |
| United Arab Emirates             | 94 737                  | 117                                     | 55.4                                                              | 130 952             | 151                                     | 31.5                                                              | 235 889               | 268                                     | -44.5                                                             |
| Yemen                            | 83 278 (127 227)        | 100 (137)                               | -60.6 (34.5)                                                      | 89 (181 480)        | 100 (137)                               | -36.2 (26.8)                                                      | 184 708 (278 346)     | 100 (137)                               | -36.2 (26.8)                                                      |
| Yemen                            | 20 352                  | 101                                     | -25.7                                                             | 21 344              | 107                                     | -26.7                                                             | 41 696                | 107                                     | -26.7                                                             |
| Yemen                            | 94 737                  | 117                                     | 55.4                                                              | 130 952             | 151                                     | 31.5                                                              | 235 889               | 268                                     | -44.5                                                             |
| Yemen                            | 83 278 (127 227)        | 100 (137)                               | -60.6 (34.5)                                                      | 89 (181 480)        | 100 (137)                               | -36.2 (26.8)                                                      | 184 708 (278 346)     | 100 (137)                               | -36.2 (26.8)                                                      |
| Yemen                            | 20 352                  | 101                                     | -25.7                                                             | 21 344              | 107                                     | -26.7                                                             | 41 696                | 107                                     | -26.7                                                             |
| Yemen                            | 94 737                  | 117                                     | 55.4                                                              | 130 952             | 151                                     | 31.5                                                              | 235 889               | 268                                     | -44.5                                                             |
| Yemen                            | 83 278 (127 227)        | 100 (137)                               | -60.6 (34.5)                                                      | 89 (181 480)        | 100 (137)                               | -36.2 (26.8)                                                      | 184 708 (278 346)     | 100 (137)                               | -36.2 (26.8)                                                      |
| Yemen                            | 20 352                  | 101                                     | -25.7                                                             | 21 344              | 107                                     | -26.7                                                             | 41 696                | 107                                     | -26.7                                                             |
| Yemen                            | 94 737                  | 117                                     | 55.4                                                              | 130 952             | 151                                     | 31.5                                                              | 235 889               | 268                                     | -44.5                                                             |
| Yemen                            | 83 278 (127 227)        | 100 (137)                               | -60.6 (34.5)                                                      | 89 (181 480)        | 100 (137)                               | -36.2 (26.8)                                                      | 184 708 (278 346)     | 100 (137)                               | -36.2 (26.8)                                                      |
| Yemen                            | 20 352                  | 101                                     | -25.7                                                             | 21 344              | 107                                     | -26.7                                                             | 41 696                | 107                                     | -26.7                                                             |
| Yemen                            | 94 737                  | 117                                     | 55.4                                                              | 130 952             | 151                                     | 31.5                                                              | 235 889               | 268                                     | -44.5                                                             |
| Yemen                            | 83 278 (127 227)        | 100 (137)                               | -60.6 (34.5)                                                      | 89 (181 480)        | 100 (137)                               | -36.2 (26.8)                                                      | 184 708 (278 346)     | 100 (137)                               | -36.2 (26.8)                                                      |
| Yemen                            | 20 352                  | 101                                     | -25.7                                                             | 21 344              | 107                                     | -26.7                                                             | 41 696                | 107                                     | -26.7                                                             |
| Yemen                            | 94 737                  | 117                                     | 55.4                                                              | 130 952             | 151                                     | 31.5                                                              | 235 889               | 268                                     | -44.5                                                             |
| Yemen                            | 83 278 (127 227)        | 100 (137)                               | -60.6 (34.5)                                                      | 89 (181 480)        | 100 (137)                               | -36.2 (26.8)                                                      | 184 708 (278 346)     | 100 (137)                               | -36.2 (26.8)                                                      |
| Yemen                            | 20 352                  | 101                                     | -25.7                                                             | 21 344              | 107                                     | -26.7                                                             | 41 696                | 107                                     | -26.7                                                             |
| Yemen                            | 94 737                  | 117                                     | 55.4                                                              | 130 952             | 151                                     | 31.5                                                              | 235 889               | 268                                     | -44.5                                                             |
| Yemen                            | 83 278 (127 227)        | 100 (137)                               | -60.6 (34.5)                                                      | 89 (181 480)        | 100 (137)                               | -36.2 (26.8)                                                      | 184 708 (278 346)     | 100 (137)                               | -36.2 (26.8)                                                      |
| Yemen                            | 20 352                  | 101                                     | -25.7                                                             | 21 344              | 107                                     | -26.7                                                             | 41 696                | 107                                     | -26.7                                                             |
| Yemen                            | 94 737                  | 117                                     | 55.4                                                              | 130 952             | 151                                     | 31.5                                                              | 235 889               | 268                                     | -44.5                                                             |
| Yemen                            | 83 278 (127 227)        | 100 (137)                               | -60.6 (34.5)                                                      | 89 (181 480)        | 100 (137)                               | -36.2 (26.8)                                                      | 184 708 (278 346)     | 100 (137)                               | -36.2 (26.8)                                                      |
| Yemen                            | 20 352                  | 101                                     | -25.7                                                             | 21 344              | 107                                     | -26.7                                                             | 41 696                | 107                                     | -26.7                                                             |
| Yemen                            | 94 737                  | 117                                     | 55.4                                                              | 130 952             | 151                                     | 31.5                                                              | 235 889               | 268                                     | -44.5                                                             |
| Yemen                            | 83 278 (127 227)        | 100 (137)                               | -60.6 (34.5)                                                      | 89 (181 480)        | 100 (137)                               | -36.2 (26.8)                                                      | 184 708 (278 346)     | 100 (137)                               | -36.2 (26.8)                                                      |
| Yemen                            | 20 352                  | 101                                     | -25.7                                                             | 21 344              | 107                                     | -26.7                                                             | 41 696                | 107                                     | -26.7                                                             |
| Yemen                            | 94 737                  | 117                                     | 55.4                                                              | 130 952             | 151                                     | 31.5                                                              | 235 889               | 268                                     | -44.5                                                             |
| Yemen                            | 83 278 (127 227)        | 100 (137)                               | -60.6 (34.5)                                                      | 89 (181 480)        | 100 (137)                               | -36.2 (26.8)                                                      | 184 708 (278 346)     | 100 (137)                               | -36.2 (26.8)                                                      |
| Yemen                            | 20 352                  | 101                                     | -25.7                                                             | 21 344              | 107                                     | -26.7                                                             | 41 696                | 107                                     | -26.7                                                             |
| Yemen                            | 94 737                  | 117                                     | 55.4                                                              | 130 952             | 151                                     | 31.5                                                              | 235 889               | 268                                     | -44.5                                                             |
| Yemen                            | 83 278 (127 227)        | 100 (137)                               | -60.6 (34.5)                                                      | 89 (181 480)        | 100 (137)                               | -36.2 (26.8)                                                      | 184 708 (278 346)     | 100 (137)                               | -36.2 (26.8)                                                      |
| Yemen                            | 20 352                  | 101                                     | -25.7                                                             | 21 344              | 107                                     | -26.7                                                             | 41 696                | 107                                     | -26.7                                                             |
| Yemen                            | 94 737                  | 117                                     | 55.4                                                              | 130 952             | 151                                     | 31.5                                                              | 235 889               | 268                                     | -44.5                                                             |
| Yemen                            | 83 278 (127 227)        | 100 (137)                               | -60.6 (34.5)                                                      | 89 (181 480)        | 100 (137)                               | -36.2 (26.8)                                                      | 184 708 (278 346)     | 100 (137)                               | -36.2 (26.8)                                                      |
| Yemen                            | 20 352                  | 101                                     | -25.7                                                             | 21 344              | 107                                     | -26.7                                                             | 41 696                | 107                                     | -26.7                                                             |
| Yemen                            | 94 737                  | 117                                     | 55.4                                                              | 130 952             | 151                                     | 31.5                                                              | 235 889               | 268                                     | -44.5                                                             |
| Yemen                            |                         |                                         |                                                                   |                     |                                         |                                                                   |                       |                                         |                                                                   |

| Location                           | YLLs (95% U)                                        |                                         |                                                                   | YLDs (95% U)                                      |                                         |                                                                   | DALYs (95% U)                                       |                                         |                                                                   |
|------------------------------------|-----------------------------------------------------|-----------------------------------------|-------------------------------------------------------------------|---------------------------------------------------|-----------------------------------------|-------------------------------------------------------------------|-----------------------------------------------------|-----------------------------------------|-------------------------------------------------------------------|
|                                    | 2017 counts                                         | 2017 age-standardised rates per 100,000 | Percentage change in age-standardised rates between 1990 and 2017 | 2017 counts                                       | 2017 age-standardised rates per 100,000 | Percentage change in age-standardised rates between 1990 and 2017 | 2017 counts                                         | 2017 age-standardised rates per 100,000 | Percentage change in age-standardised rates between 1990 and 2017 |
| Marshall Islands                   | 80<br>(58 to 106)                                   | 178<br>(133 to 229)                     | 14.4<br>(15.6 to 48.5)                                            | 39<br>(28 to 52)                                  | 81<br>(58 to 109)                       | 87.1<br>(78.4 to 95.2)                                            | 119<br>(93 to 149)                                  | 259<br>(205 to 320)                     | 30.3<br>(7.8 to 56.8)                                             |
| Northern Mariana Islands           | 48<br>(39 to 56)                                    | 45<br>(37 to 53)                        | 4.6<br>(7.8 to 12.1)                                              | 107<br>(92 to 123)                                | 45<br>(39 to 53)                        | 45.6<br>(41.6 to 49.6)                                            | 96<br>(74 to 118)                                   | 197<br>(156 to 231)                     | 36.3<br>(17.6 to 36.3)                                            |
| Papua New Guinea                   | 15 202<br>(8 905 to 22 711)                         | 15 202<br>(8 300 to 27 978)             | 12.5<br>(21.1 to 48.9)                                            | 15 202<br>(8 203 to 22 978)                       | 15 202<br>(8 203 to 22 978)             | 12.5<br>(8.6 to 10.3)                                             | 15 202<br>(8 203 to 22 978)                         | 20 992<br>(14 158 to 28 642)            | 20.9<br>(9.5 to 58.9)                                             |
| Samoa                              | 189<br>(136 to 248)                                 | 117<br>(85 to 152)                      | 6.3<br>(12.0 to 40.3)                                             | 145<br>(104 to 195)                               | 88<br>(65 to 118)                       | 145<br>(104 to 195)                                               | 334<br>(230 to 434)                                 | 204<br>(140 to 268)                     | 29.1<br>(9.9 to 51.5)                                             |
| Solomon Islands                    | 4 077<br>(3 284 to 4 903)                           | 833<br>(680 to 973)                     | -15.8<br>(33.8 to 6.2)                                            | 1 628<br>(1 251 to 2 005)                         | 162<br>(125 to 200)                     | -15.8<br>(55.1 to 1 003)                                          | 1 628<br>(1 251 to 2 005)                           | 2 005<br>(1 500 to 2 500)               | -10.3<br>(27.4 to 47.7)                                           |
| Tonga                              | 82<br>(70 to 96)                                    | 82<br>(70 to 96)                        | 0<br>(0 to 0)                                                     | 82<br>(70 to 96)                                  | 82<br>(70 to 96)                        | 0<br>(0 to 0)                                                     | 82<br>(70 to 96)                                    | 82<br>(70 to 96)                        | 0<br>(0 to 0)                                                     |
| Vanuatu                            | 96<br>(85 to 107)                                   | 158<br>(139 to 178)                     | 17.5<br>(21.7 to 23.7)                                            | 119<br>(105 to 134)                               | 119<br>(105 to 134)                     | 17.5<br>(21.7 to 23.7)                                            | 158<br>(139 to 178)                                 | 158<br>(139 to 178)                     | 17.5<br>(21.7 to 23.7)                                            |
| <b>Southeast Asia</b>              | <b>1 400 902</b><br><b>(1 309 922 to 1 562 321)</b> | <b>232</b><br><b>(217 to 253)</b>       | <b>-29.9</b><br><b>(-39.2 to -14.8)</b>                           | <b>287 499</b><br><b>(268 176 to 305 499)</b>     | <b>47</b><br><b>(42 to 52)</b>          | <b>-1.8</b><br><b>(-2.4 to 6.2)</b>                               | <b>1 688 594</b><br><b>(1 565 442 to 1 866 980)</b> | <b>277</b><br><b>(259 to 295)</b>       | <b>-26.2</b><br><b>(-39.0 to -12.6)</b>                           |
| Cambodia                           | 50 273<br>(42 496 to 60 195)                        | 183<br>(159 to 209)                     | -15.7<br>(-15.0 to 11.7)                                          | 2 257<br>(6 021 to 11 051)                        | 40<br>(44 to 80)                        | 36.0<br>(31.2 to 40.8)                                            | 58 229<br>(50 520 to 68 410)                        | 433<br>(386 to 512)                     | -11.1<br>(-29.5 to 14.0)                                          |
| Indonesia                          | 509 815<br>(471 215 to 582 918)                     | 231<br>(217 to 259)                     | -21.9<br>(-51.5 to -26.8)                                         | 60 103<br>(63 999 to 114 956)                     | 26<br>(26 to 47)                        | 30.9<br>(35.4 to 31.3)                                            | 509 815<br>(471 215 to 582 918)                     | 231<br>(217 to 259)                     | -21.9<br>(-49.6 to -27.9)                                         |
| Laos                               | 15 097<br>(10 729 to 18 642)                        | 259<br>(197 to 320)                     | 12.2<br>(43.4 to 27.9)                                            | 2 992<br>(2 178 to 4 000)                         | 32<br>(38 to 69)                        | 30.9<br>(44.7 to 56.8)                                            | 18 600<br>(13 602 to 21 769)                        | 311<br>(242 to 374)                     | 41.8<br>(36.5 to 39.9)                                            |
| Malaysia                           | 21 467<br>(16 855 to 25 363)                        | 79<br>(62 to 92)                        | -2.4<br>(-50.6 to 0)                                              | 12 333<br>(8 789 to 18 933)                       | 12<br>(15 to 37)                        | 43.9<br>(34.8 to 52.6)                                            | 33 800<br>(28 150 to 39 558)                        | 121<br>(107 to 140)                     | 9.5<br>(-12.4 to 18.8)                                            |
| Maldives                           | 349<br>(349 to 320)                                 | 111<br>(97 to 124)                      | 0<br>(-7.5 to 16.0)                                               | 75<br>(75 to 249)                                 | 43<br>(39 to 59)                        | 0<br>(0 to 1.9)                                                   | 349<br>(349 to 320)                                 | 111<br>(97 to 124)                      | 0<br>(-9.9 to 10.8)                                               |
| Mauritius                          | 1 825 to 2 256<br>(1 825 to 2 256)                  | 139<br>(139 to 154)                     | 0<br>(0.0 to 44.4)                                                | 128 to 154<br>(128 to 154)                        | 66<br>(66 to 66)                        | 0<br>(0.0 to 44.4)                                                | 1 825 to 2 256<br>(1 825 to 2 256)                  | 139<br>(139 to 154)                     | 0<br>(-4.4 to 4.4)                                                |
| Myanmar                            | 1 020 642 to 1 608<br>(1 020 642 to 1 608)          | 155<br>(155 to 155)                     | 0<br>(-44.4 to 44.4)                                              | 83 938<br>(72 237 to 40 838)                      | 41<br>(41 to 41)                        | 0<br>(-22.3 to 32.4)                                              | 1 020 642 to 1 608<br>(1 020 642 to 1 608)          | 155<br>(155 to 155)                     | 0<br>(-39.7 to 40.7)                                              |
| Philippines                        | 1 188 211<br>(1 113 328 to 1 123 900)               | 231<br>(217 to 253)                     | -11.1<br>(-18.1 to 11.7)                                          | 11 711<br>(9 269 to 10 129)                       | 29<br>(29 to 29)                        | 11.1<br>(9.6 to 12.6)                                             | 1 188 211<br>(1 113 328 to 1 123 900)               | 231<br>(217 to 253)                     | -11.1<br>(-11.0 to 11.0)                                          |
| Sri Lanka                          | 52 358<br>(41 342 to 64 745)                        | 231<br>(184 to 283)                     | 19.4<br>(28.7 to 1.1)                                             | 11 711<br>(9 269 to 10 129)                       | 29<br>(29 to 29)                        | 11.1<br>(9.6 to 12.6)                                             | 64 069<br>(51 640 to 77 318)                        | 231<br>(217 to 253)                     | 19.4<br>(10.8 to 19.7)                                            |
| Shayelthes                         | 191<br>(157 to 219)                                 | 231<br>(217 to 253)                     | 0<br>(-25.8 to 9.1)                                               | 191<br>(157 to 219)                               | 231<br>(217 to 253)                     | 0<br>(-25.8 to 9.1)                                               | 191<br>(157 to 219)                                 | 231<br>(217 to 253)                     | 0<br>(-1.5 to 1.5)                                                |
| Thailand                           | 105 080<br>(85 240 to 122 175)                      | 113<br>(100 to 127)                     | -4.2<br>(-54.3 to 42.2)                                           | 39 279<br>(27 134 to 266 166)                     | 31<br>(31 to 31)                        | 44.0<br>(7.4 to 21.0)                                             | 105 080<br>(85 240 to 122 175)                      | 113<br>(100 to 127)                     | -4.2<br>(-47.3 to 37.9)                                           |
| Timor-Leste                        | 2 166<br>(1 402 to 2 909)                           | 205<br>(162 to 257)                     | 0<br>(-37.2 to 37.5)                                              | 499<br>(363 to 671)                               | 50<br>(50 to 50)                        | 56.7<br>(49.2 to 64.2)                                            | 2 166<br>(1 402 to 2 909)                           | 205<br>(162 to 257)                     | 0<br>(-28.3 to 3.9)                                               |
| Vietnam                            | 2 995 251<br>(2 542 716 to 3 521 194)               | 327<br>(282 to 381)                     | 0<br>(-27.1 to 20.9)                                              | 57 685<br>(40 942 to 78 882)                      | 37<br>(42 to 81)                        | 32.1<br>(24.9 to 39.5)                                            | 2 995 251<br>(2 542 716 to 3 521 194)               | 327<br>(282 to 381)                     | 0<br>(-3.7 to 3.7)                                                |
| <b>Sub-Saharan Africa</b>          | <b>1 283 900</b><br><b>(1 143 167 to 1 528 381)</b> | <b>189</b><br><b>(189 to 221)</b>       | <b>-18.0</b><br><b>(-29.2 to -4.4)</b>                            | <b>1 283 900</b><br><b>(893 400 to 1 641 170)</b> | <b>189</b><br><b>(189 to 221)</b>       | <b>-18.0</b><br><b>(-4.3 to 4.1)</b>                              | <b>1 283 900</b><br><b>(1 143 167 to 1 528 381)</b> | <b>189</b><br><b>(189 to 221)</b>       | <b>-18.0</b><br><b>(-18.4 to -2.2)</b>                            |
| <b>Central sub-Saharan Africa</b>  | <b>99 455 to 208 538</b>                            | <b>159</b><br><b>(159 to 208)</b>       | <b>-13.9</b><br><b>(-30.7 to 13.0)</b>                            | <b>129 399</b><br><b>(93 808 to 170 291)</b>      | <b>189</b><br><b>(189 to 221)</b>       | <b>-13.9</b><br><b>(-1.9 to 5.5)</b>                              | <b>99 455 to 208 538</b>                            | <b>159</b><br><b>(159 to 208)</b>       | <b>-13.9</b><br><b>(-17.4 to -8.8)</b>                            |
| Angola                             | 34 760<br>(26 802 to 50 985)                        | 189<br>(150 to 261)                     | -23.9<br>(-64.8 to 19.0)                                          | 29 496<br>(21 818 to 38 607)                      | 189<br>(189 to 221)                     | -23.9<br>(-64.8 to 19.0)                                          | 34 760<br>(26 802 to 50 985)                        | 189<br>(150 to 261)                     | -23.9<br>(-13.1 to 20.4)                                          |
| Central African Republic           | 6 186<br>(4 742 to 12 051)                          | 113<br>(113 to 113)                     | 0<br>(-11.7 to 6.7)                                               | 6 186<br>(4 742 to 12 051)                        | 113<br>(113 to 113)                     | 0<br>(-11.7 to 6.7)                                               | 6 186<br>(4 742 to 12 051)                          | 113<br>(113 to 113)                     | 0<br>(-1.4 to 1.4)                                                |
| Congo (Brazzaville)                | 8 834<br>(8 834 to 0 027)                           | 113<br>(113 to 261)                     | -22.7<br>(-43.2 to 6.6)                                           | 113<br>(8 834 to 7 956)                           | 113<br>(113 to 228)                     | -22.7<br>(-50.0 to 0.6)                                           | 8 834<br>(8 834 to 0 027)                           | 113<br>(113 to 261)                     | -22.7<br>(-27.2 to 2.9)                                           |
| DR Congo                           | 82 345<br>(54 823 to 138 278)                       | 231<br>(190 to 211)                     | 11.4<br>(-30.0 to 9.1)                                            | 162<br>(61 687 to 131 188)                        | 113<br>(113 to 113)                     | 11.4<br>(-30.0 to 9.1)                                            | 82 345<br>(54 823 to 138 278)                       | 231<br>(190 to 211)                     | 11.4<br>(-12.4 to 12.2)                                           |
| Equatorial Guinea                  | 1 196<br>(702 to 0 011)                             | 113<br>(113 to 261)                     | -30.9<br>(-62.3 to 18.6)                                          | 1 196<br>(702 to 0 011)                           | 113<br>(113 to 261)                     | -30.9<br>(-62.3 to 18.6)                                          | 1 196<br>(702 to 0 011)                             | 113<br>(113 to 261)                     | -30.9<br>(-15.3 to 15.3)                                          |
| Gabon                              | 2 158<br>(1 550 to 3 440)                           | 215<br>(215 to 257)                     | -11.1<br>(-43.4 to 0.6)                                           | 2 158<br>(1 550 to 3 440)                         | 215<br>(215 to 257)                     | -11.1<br>(-43.4 to 0.6)                                           | 2 158<br>(1 550 to 3 440)                           | 215<br>(215 to 257)                     | -11.1<br>(-29.6 to 6.2)                                           |
| <b>Eastern sub-Saharan Africa</b>  | <b>544 844</b><br><b>(479 938 to 600 996)</b>       | <b>237</b><br><b>(206 to 251)</b>       | <b>-20.6</b><br><b>(-33.7 to -6.6)</b>                            | <b>544 844</b><br><b>(426 189 to 727 264)</b>     | <b>237</b><br><b>(176 to 319)</b>       | <b>-20.6</b><br><b>(-6.8 to 2.1)</b>                              | <b>544 844</b><br><b>(479 938 to 600 996)</b>       | <b>237</b><br><b>(206 to 251)</b>       | <b>-20.6</b><br><b>(-19.8 to 0.9)</b>                             |
| Burundi                            | 13 690<br>(10 612 to 17 492)                        | 225<br>(180 to 282)                     | 0<br>(-10.2 to 2.1)                                               | 15 009<br>(10 788 to 19 921)                      | 189<br>(189 to 221)                     | 0<br>(-9.0 to 4.8)                                                | 13 690<br>(10 612 to 17 492)                        | 225<br>(180 to 282)                     | 0<br>(-36.4 to 33.9)                                              |
| Comoros                            | 920<br>(718 to 1 225)                               | 177<br>(142 to 234)                     | -27.3<br>(-41.9 to -4.2)                                          | 1 330<br>(986 to 1 760)                           | 235<br>(170 to 311)                     | -27.3<br>(-11.2 to 6.5)                                           | 920<br>(718 to 1 225)                               | 177<br>(142 to 234)                     | -27.3<br>(-26.0 to 4.8)                                           |
| Djibouti                           | 1 100<br>(872 to 1 941)                             | 113<br>(113 to 261)                     | -11.4<br>(-43.9 to 4.4)                                           | 1 100<br>(872 to 1 941)                           | 113<br>(113 to 261)                     | -11.4<br>(-43.9 to 4.4)                                           | 1 100<br>(872 to 1 941)                             | 113<br>(113 to 261)                     | -11.4<br>(-33.0 to 10.2)                                          |
| Eritrea                            | 7 993<br>(5 855 to 11 123)                          | 237<br>(217 to 253)                     | -18.4<br>(-40.3 to 16.6)                                          | 7 993<br>(5 855 to 11 123)                        | 237<br>(217 to 253)                     | -18.4<br>(-40.3 to 16.6)                                          | 7 993<br>(5 855 to 11 123)                          | 237<br>(217 to 253)                     | -18.4<br>(-24.8 to 7.0)                                           |
| Ethiopia                           | 144 032<br>(120 363 to 169 974)                     | 237<br>(217 to 253)                     | -18.4<br>(-10.5 to 5.1)                                           | 144 032<br>(120 363 to 169 974)                   | 237<br>(217 to 253)                     | -18.4<br>(-10.5 to 5.1)                                           | 144 032<br>(120 363 to 169 974)                     | 237<br>(217 to 253)                     | -18.4<br>(-16.4 to 5.1)                                           |
| Kenya                              | 63 203<br>(52 216 to 76 054)                        | 230<br>(205 to 270)                     | -7.2<br>(-34.4 to 15.3)                                           | 76 054<br>(70 110 to 128 483)                     | 230<br>(230 to 392)                     | -7.2<br>(-6.0 to 10.8)                                            | 63 203<br>(52 216 to 76 054)                        | 230<br>(205 to 270)                     | -7.2<br>(-13.1 to 1.4)                                            |
| Madagascar                         | 25 864<br>(19 652 to 34 321)                        | 166<br>(139 to 215)                     | -28.9<br>(-43.5 to 8.6)                                           | 25 864<br>(19 652 to 34 321)                      | 166<br>(166 to 205)                     | -28.9<br>(-43.5 to 8.6)                                           | 25 864<br>(19 652 to 34 321)                        | 166<br>(139 to 215)                     | -28.9<br>(-25.1 to 7.2)                                           |
| Malawi                             | 27 199<br>(23 145 to 33 643)                        | 237<br>(215 to 298)                     | -13.8<br>(-34.3 to 47.8)                                          | 27 199<br>(23 145 to 33 643)                      | 237<br>(161 to 294)                     | -13.8<br>(-3.6 to 1.8)                                            | 27 199<br>(23 145 to 33 643)                        | 237<br>(215 to 298)                     | -13.8<br>(-21.9 to 10.2)                                          |
| Mozambique                         | 57 374<br>(47 530 to 64 615)                        | 305<br>(260 to 300)                     | 0<br>(-26.6 to 12.4)                                              | 41 139<br>(29 612 to 89 991)                      | 237<br>(171 to 314)                     | 0<br>(-4.1 to 10.7)                                               | 57 374<br>(47 530 to 64 615)                        | 305<br>(260 to 300)                     | 0<br>(-17.7 to 8.4)                                               |
| Rwanda                             | 15 256<br>(11 881 to 20 085)                        | 200<br>(180 to 255)                     | -36.8<br>(-53.5 to -7.7)                                          | 18 739<br>(15 624 to 0 032)                       | 224<br>(163 to 298)                     | -36.8<br>(-12.1 to 7.8)                                           | 15 256<br>(11 881 to 20 085)                        | 200<br>(180 to 255)                     | -36.8<br>(-36.1 to 8.5)                                           |
| Somalia                            | 18 610<br>(12 746 to 26 794)                        | 193<br>(140 to 261)                     | -24.0<br>(-39.1 to 4.4)                                           | 24 328<br>(17 775 to 19 959)                      | 237<br>(208 to 298)                     | -24.0<br>(-6.0 to 1.4)                                            | 18 610<br>(12 746 to 26 794)                        | 193<br>(140 to 261)                     | -24.0<br>(-18.2 to 15.1)                                          |
| South Sudan                        | 20 806<br>(9 337 to 17 104)                         | 237<br>(154 to 278)                     | 20.6<br>(-14.4 to 42.2)                                           | 20 806<br>(9 337 to 17 104)                       | 237<br>(154 to 278)                     | 20.6<br>(-14.4 to 42.2)                                           | 20 806<br>(9 337 to 17 104)                         | 237<br>(154 to 278)                     | 20.6<br>(-18.5 to 15.1)                                           |
| Tanzania                           | 86 274<br>(71 824 to 109 749)                       | 227<br>(187 to 267)                     | -12.0<br>(-32.0 to 3.3)                                           | 83 589<br>(60 134 to 113 655)                     | 237<br>(176 to 323)                     | -12.0<br>(-2.3 to 6.2)                                            | 86 274<br>(71 824 to 109 749)                       | 227<br>(187 to 267)                     | -12.0<br>(-16.4 to 8.8)                                           |
| Uganda                             | 36 951<br>(27 835 to 47 700)                        | 169<br>(130 to 210)                     | -12.7<br>(-39.9 to 17.1)                                          | 51 097<br>(37 014 to 68 263)                      | 237<br>(162 to 298)                     | -12.7<br>(-14.7 to 20.5)                                          | 36 951<br>(27 835 to 47 700)                        | 169<br>(130 to 210)                     | -12.7<br>(-14.1 to 17.5)                                          |
| Zambia                             | 27 600<br>(23 300 to 32 623)                        | 215<br>(215 to 257)                     | -21.3<br>(-38.7 to 4.4)                                           | 21 513<br>(16 917 to 34 499)                      | 237<br>(187 to 314)                     | -21.3<br>(-5.8 to 1.4)                                            | 27 600<br>(23 300 to 32 623)                        | 215<br>(215 to 257)                     | -21.3<br>(-25.1 to 2.1)                                           |
| <b>Southern sub-Saharan Africa</b> | <b>46 482</b><br><b>(37 637 to 46 423)</b>          | <b>113</b><br><b>(81 to 153)</b>        | <b>-23.2</b><br><b>(-43.3 to -3.3)</b>                            | <b>78 654</b><br><b>(59 317 to 106 673)</b>       | <b>113</b><br><b>(81 to 153)</b>        | <b>-23.2</b><br><b>(-6.1 to 4.9)</b>                              | <b>46 482</b><br><b>(37 637 to 46 423)</b>          | <b>113</b><br><b>(81 to 153)</b>        | <b>-23.2</b><br><b>(-14.3 to 6.6)</b>                             |
| Botswana                           | 1 129<br>(822 to 1 536)                             | 71<br>(66 to 77)                        | -26.8<br>(-56.8 to 2.7)                                           | 2 140<br>(1 529 to 3 014)                         | 82<br>(82 to 155)                       | -26.8<br>(-6.2 to 1.2)                                            | 1 129<br>(822 to 1 536)                             | 71<br>(66 to 77)                        | -26.8<br>(-16.6 to 21.6)                                          |
| Lesotho                            | 1 586<br>(1 152 to 2 072)                           | 114<br>(84 to 146)                      | -1.8<br>(-16.6 to 48.9)                                           | 1 831<br>(1 372 to 2 454)                         | 114<br>(84 to 156)                      | -1.8<br>(-4.6 to 10.6)                                            | 1 586<br>(1 152 to 2 072)                           | 114<br>(84 to 146)                      | -1.8<br>(-17.2 to 26.9)                                           |
| Namibia                            | 1 163 to 1 805<br>(1 163 to 1 805)                  | 87<br>(73 to 107)                       | 0<br>(-16.6 to 0.4)                                               | 1 163 to 1 805<br>(1 163 to 1 805)                | 87<br>(73 to 107)                       | 0<br>(-16.6 to 0.4)                                               | 1 163 to 1 805<br>(1 163 to 1 805)                  | 87<br>(73 to 107)                       | 0<br>(-22.8 to 4.4)                                               |
| South Africa                       | 26 615<br>(22 281 to 29 949)                        | 54<br>(47 to 62)                        | -24.6<br>(-35.8 to 11.6)                                          | 57 918<br>(41 363 to 78 786)                      | 114<br>(82 to 154)                      | -24.6<br>(-1.9 to 2.1)                                            | 26 615<br>(22 281 to 29 949)                        | 54<br>(47 to 62)                        | -24.6<br>(-16.2 to 10.2)                                          |
| Swaziland                          | 723<br>(516 to 961)                                 | 99<br>(87 to 127)                       | -13.3<br>(-10.2 to 6.6)                                           | 951<br>(683 to 1 264)                             | 115<br>(84 to 156)                      | -13.3<br>(-5.4 to 9.9)                                            | 723<br>(516 to 961)                                 | 99<br>(87 to 127)                       | -13.3<br>(-17.2 to 3.8)                                           |
| Zimbabwe                           | 10 723<br>(7 873 to 13 723)                         | 133<br>(110 to 160)                     | 13.3<br>(-29.9 to 47.6)                                           | 13 591<br>(9 533 to 18 302)                       | 133<br>(96 to 177)                      | 13.3<br>(10.1 to 16.2)                                            | 10 723<br>(7 873 to 13 72                           |                                         |                                                                   |
