# Supplementary material for: The global burden of falls: global, regional and national estimates of morbidity and mortality from the Global Burden of Disease Study 2017
Source: HighWire-hosted journal article supplement (doi:10.1136/injuryprev-2019-043286), 2020-01-15
Supplement: injuryprev-2019-043286supp005_data_supplement.pdf [file injuryprev-2019-043286supp005_data_supplement.pdf]

**Table 3** YLLs, YLDs, and DALYs for 2017 and percentage change of age-standardized rates between 1990 and 2017 by location for falls

| Location                                                | YLL (95% UI)               |                                         |                                                                   |                            | YLD (95% UI)                            |                                                                   |                            |                                         | DALY (95% UI)                                                     |                            |                                         |                                                                   |
|---------------------------------------------------------|----------------------------|-----------------------------------------|-------------------------------------------------------------------|----------------------------|-----------------------------------------|-------------------------------------------------------------------|----------------------------|-----------------------------------------|-------------------------------------------------------------------|----------------------------|-----------------------------------------|-------------------------------------------------------------------|
|                                                         | 2017 counts                | 2017 age-standardized rates per 100,000 | Percentage change in age-standardized rates between 1990 and 2017 | 2017 counts                | 2017 age-standardized rates per 100,000 | Percentage change in age-standardized rates between 1990 and 2017 | 2017 counts                | 2017 age-standardized rates per 100,000 | Percentage change in age-standardized rates between 1990 and 2017 | 2017 counts                | 2017 age-standardized rates per 100,000 | Percentage change in age-standardized rates between 1990 and 2017 |
| <b>Global</b>                                           | 16 688 088                 | 217                                     | 15.7                                                              | 19 252 699                 | 243                                     | 9.3                                                               | 35 940 787                 | 459                                     | 15.8                                                              | 50 929 476                 | 618                                     | 21.6                                                              |
| <b>Low SDI</b>                                          | (15 101 897 to 17 336 830) | (136 to 229)                            | (31.7 to 4.3)                                                     | (13 725 429 to 16 400 433) | (173 to 230)                            | (10.7 to 7.9)                                                     | (10 185 695 to 12 903 289) | (137 to 194)                            | (15.3 to 8.0)                                                     | (13 725 429 to 16 400 433) | (173 to 230)                            | (10.7 to 7.9)                                                     |
| <b>Low-middle SDI</b>                                   | (2 776 545 to 3 104 958)   | (295 to 353)                            | (20.5 to 1.7)                                                     | (2 337 007 to 2 886 036)   | (125 to 247)                            | (7.6 to 12.1)                                                     | (4 178 155 to 5 354 911)   | (205 to 277)                            | (18.0 to 4.7)                                                     | (2 776 545 to 3 104 958)   | (295 to 353)                            | (20.5 to 1.7)                                                     |
| <b>High-middle SDI</b>                                  | (4 047 237 to 5 182 512)   | (95 to 247)                             | (18.4 to 4.6)                                                     | (2 283 323 to 3 338 877)   | (109 to 193)                            | (16.1 to 26.7)                                                    | (6 753 895 to 9 216 910)   | (137 to 219)                            | (18.0 to 4.7)                                                     | (4 047 237 to 5 182 512)   | (95 to 247)                             | (18.4 to 4.6)                                                     |
| <b>High SDI</b>                                         | (1 884 181 to 1 989 251)   | (100 to 106)                            | (31.5 to 17.3)                                                    | (8 240 390 to 9 258 122)   | (42 to 76)                              | (16.5 to 6.2)                                                     | (8 025 519 to 8 499 097)   | (74 to 127)                             | (15.9 to 11.2)                                                    | (1 884 181 to 1 989 251)   | (100 to 106)                            | (31.5 to 17.3)                                                    |
| <b>Central Europe, Eastern Europe, and Central Asia</b> | (113 988 to 134 465)       | (26 to 149)                             | (60.2 to 40.3)                                                    | (299 878 to 574 794)       | (39 to 68)                              | (4.2 to 9.2)                                                      | (417 543 to 695 466)       | (65 to 79)                              | (26.5 to 19.2)                                                    | (113 988 to 134 465)       | (26 to 149)                             | (60.2 to 40.3)                                                    |
| <b>Central Asia</b>                                     | 217                        | 69                                      | -75.0                                                             | 454                        | 14                                      | -24.9                                                             | 166                        | 5                                       | -31.9                                                             | 217                        | 69                                      | -75.0                                                             |
| <b>Armenia</b>                                          | (2 119 to 2 433)           | (64 to 74)                              | (79.0 to 74.2)                                                    | (11 540 to 22 780)         | (20 to 630)                             | (28.0 to 22.0)                                                    | (13 784 to 25 043)         | (39 to 37)                              | (39.0 to 39.0)                                                    | (2 119 to 2 433)           | (64 to 74)                              | (79.0 to 74.2)                                                    |
| <b>Azerbaijan</b>                                       | (9 720 to 10 408)          | (180 to 160)                            | (59.6 to 12.8)                                                    | (35 164 to 68 858)         | (33 to 146)                             | (10.2 to 2.3)                                                     | (45 580 to 78 483)         | (49 to 75)                              | (24.8 to 7.8)                                                     | (9 720 to 10 408)          | (180 to 160)                            | (59.6 to 12.8)                                                    |
| <b>Georgia</b>                                          | (6 504 to 7 513)           | (164 to 177)                            | (46.2 to 32.2)                                                    | (14 874 to 16 703)         | (31 to 204)                             | (22.6 to 18.7)                                                    | (21 907 to 25 656)         | (60 to 67)                              | (10.5 to 12.1)                                                    | (6 504 to 7 513)           | (164 to 177)                            | (46.2 to 32.2)                                                    |
| <b>Kazakhstan</b>                                       | (9 140 to 16 165)          | (158 to 196)                            | (37.9 to 27.0)                                                    | (63 819 to 124 290)        | (35 to 689)                             | (12.4 to 6.1)                                                     | (95 768 to 157 545)        | (54 to 54)                              | (52.6 to 86.6)                                                    | (9 140 to 16 165)          | (158 to 196)                            | (37.9 to 27.0)                                                    |
| <b>Kyrgyzstan</b>                                       | (5 361 to 6 546)           | (93 to 106)                             | (75.2 to 69.3)                                                    | (17 964 to 34 850)         | (316 to 609)                            | (28.3 to 23.4)                                                    | (24 081 to 40 499)         | (54 to 54)                              | (44.1 to 70.4)                                                    | (5 361 to 6 546)           | (93 to 106)                             | (75.2 to 69.3)                                                    |
| <b>Mongolia</b>                                         | (7 327 to 12 349)          | (220 to 265)                            | (29.1 to 25.4)                                                    | (11 503 to 25 831)         | (450 to 851)                            | (13.5 to 3.9)                                                     | (22 486 to 36 248)         | (71 to 138)                             | (11.1 to 10.0)                                                    | (7 327 to 12 349)          | (220 to 265)                            | (29.1 to 25.4)                                                    |
| <b>Tajikistan</b>                                       | (4 315 to 21 166)          | (176 to 321)                            | (-29.7 to 35.5)                                                   | (1 623 to 34 777)          | (39 to 728)                             | (19.7 to 14.4)                                                    | (44 646 to 70 204)         | (108 to 87)                             | (23.5 to 16.3)                                                    | (4 315 to 21 166)          | (176 to 321)                            | (-29.7 to 35.5)                                                   |
| <b>Turkmenistan</b>                                     | (4 010 to 5 277)           | (30 to 106)                             | (66.7 to 41.9)                                                    | (15 372 to 45 456)         | (33 to 451)                             | (10.0 to 3.3)                                                     | (20 143 to 34 644)         | (42 to 42)                              | (64.2 to 73.6)                                                    | (4 010 to 5 277)           | (30 to 106)                             | (66.7 to 41.9)                                                    |
| <b>Uzbekistan</b>                                       | (28 580 to 36 386)         | (93 to 119)                             | (59.6 to 46.5)                                                    | (44 945 to 185 084)        | (320 to 621)                            | (11.9 to 5.4)                                                     | (62 724 to 217 536)        | (46 to 72)                              | (27.5 to 18.2)                                                    | (28 580 to 36 386)         | (93 to 119)                             | (59.6 to 46.5)                                                    |
| <b>Central Europe</b>                                   | 249 886                    | 174                                     | 14.2                                                              | 1 623 449                  | 1 015                                   | 10.6                                                              | 1 893 234                  | 1 174                                   | 15.8                                                              | 2 498 886                  | 1 740                                   | 21.7                                                              |
| <b>Albania</b>                                          | (1 605 to 2 423)           | (69 to 85)                              | (13.4 to 0.0)                                                     | (21 492 to 60 606)         | (63 to 245)                             | (8.0 to 3.1)                                                      | (23 544 to 59 598)         | (96 to 96)                              | (66.4 to 116.6)                                                   | (1 605 to 2 423)           | (69 to 85)                              | (13.4 to 0.0)                                                     |
| <b>Bosnia and Herzegovina</b>                           | 2 589                      | 55                                      | -49.9                                                             | 40 939                     | 513                                     | 8.4                                                               | 43 527                     | 96                                      | -6.8                                                              | 2 589                      | 55                                      | -49.9                                                             |
| <b>Bulgaria</b>                                         | (2 268 to 2 903)           | (48 to 61)                              | (40.8 to 1.8)                                                     | (28 870 to 46 486)         | (40 to 127)                             | (4.0 to 1.3)                                                      | (34 409 to 59 203)         | (51 to 51)                              | (66.8 to 119.9)                                                   | (2 268 to 2 903)           | (48 to 61)                              | (40.8 to 1.8)                                                     |
| <b>Croatia</b>                                          | (1 906 to 14 047)          | (31 to 156)                             | (44.1 to 32.9)                                                    | (66 595 to 131 476)        | (65 to 128)                             | (14.0 to 9.5)                                                     | (79 183 to 144 455)        | (91 to 91)                              | (78.6 to 104.0)                                                   | (1 906 to 14 047)          | (31 to 156)                             | (44.1 to 32.9)                                                    |
| <b>Czech Republic</b>                                   | 14 195                     | 117                                     | 2.3                                                               | 51 864                     | 778                                     | -5.2                                                              | 66 600                     | 951                                     | -1.0                                                              | 14 195                     | 117                                     | 2.3                                                               |
| <b>Hungary</b>                                          | (3 113 to 15 147)          | (10 to 185)                             | (9.8 to 4.4)                                                      | (8 803 to 1 016)           | (50 to 1 069)                           | (8.3 to 3.2)                                                      | (60 919 to 85 858)         | (73 to 126)                             | (7.7 to 7.0)                                                      | (3 113 to 15 147)          | (10 to 185)                             | (9.8 to 4.4)                                                      |
| <b>Slovakia</b>                                         | 21 769                     | 126                                     | -67.7                                                             | 177 369                    | 1 192                                   | 4.2                                                               | 199 139                    | 1 318                                   | -13.8                                                             | 21 769                     | 126                                     | -67.7                                                             |
| <b>Slovenia</b>                                         | (20 110 to 21 408)         | (116 to 130)                            | (70.8 to 64.9)                                                    | (123 350 to 248 115)       | (84 to 103)                             | (4.6 to 2.4)                                                      | (146 807 to 205 547)       | (98 to 175)                             | (12.6 to 10.2)                                                    | (20 110 to 21 408)         | (116 to 130)                            | (70.8 to 64.9)                                                    |
| <b>Hungary</b>                                          | (26 210 to 29 231)         | (10 to 171)                             | (70.3 to 45.8)                                                    | (100 230 to 200 260)       | (172 to 422)                            | (12.0 to 16.3)                                                    | (130 172 to 227 092)       | (88 to 178)                             | (35.0 to 78.8)                                                    | (26 210 to 29 231)         | (10 to 171)                             | (70.3 to 45.8)                                                    |
| <b>Macedonia</b>                                        | 1 983                      | 19                                      | -39.1                                                             | 29 151                     | 12                                      | -12.1                                                             | 27 119                     | 97                                      | -28.6                                                             | 1 983                      | 19                                      | -39.1                                                             |
| <b>Montenegro</b>                                       | (4 616 to 6 688)           | (59 to 82)                              | (39.9 to 21.6)                                                    | (5 075 to 19 941)          | (63 to 127)                             | (11.2 to 15.9)                                                    | (5 609 to 10 339)          | (77 to 145)                             | (6.6 to 12.1)                                                     | (4 616 to 6 688)           | (59 to 82)                              | (39.9 to 21.6)                                                    |
| <b>Poland</b>                                           | 105 048                    | 34.6                                    | -560.199                                                          | 7.05                       | 660 199                                 | 7.6                                                               | 665 246                    | 1 239                                   | -13.0                                                             | 105 048                    | 34.6                                    | -560.199                                                          |
| <b>Romania</b>                                          | (97 365 to 113 222)        | (174 to 203)                            | (40.3 to 29.1)                                                    | (895 305 to 1 74 489)      | (740 to 1 455)                          | (10.7 to 4.5)                                                     | (699 241 to 975 965)       | (92 to 161)                             | (116.2 to 8.9)                                                    | (97 365 to 113 222)        | (174 to 203)                            | (40.3 to 29.1)                                                    |
| <b>Serbia</b>                                           | 46 311                     | 150                                     | -99.6                                                             | 1 995                      | 26.1                                    | -1.1                                                              | 3 117                      | 54                                      | -12.7                                                             | 46 311                     | 150                                     | -99.6                                                             |
| <b>Slovenia</b>                                         | (43 140 to 49 685)         | (188 to 193)                            | (65.5 to 48.4)                                                    | (186 496 to 367 238)       | (88 to 1 350)                           | (28.9 to 23.4)                                                    | (23 675 to 412 957)        | (86 to 528)                             | (35.0 to 28.9)                                                    | (43 140 to 49 685)         | (188 to 193)                            | (65.5 to 48.4)                                                    |
| <b>Slovakia</b>                                         | (8 785 to 12 191)          | (66 to 92)                              | (75.5 to 147 982)                                                 | (642 to 1 261)             | (10.8 to 17.4)                          | (85 851 to 159 741)                                               | (72 to 134)                | (6.6 to 14.4)                           | (8 785 to 12 191)                                                 | (66 to 92)                 | (75.5 to 147 982)                       |                                                                   |
| <b>Slovenia</b>                                         | 15 786                     | 208                                     | 46.5                                                              | 77 917                     | 1 069                                   | -12.2                                                             | 93 709                     | 1 277                                   | -20.5                                                             | 15 786                     | 208                                     | 46.5                                                              |
| <b>Slovenia</b>                                         | (2 875 to 18 267)          | (15 to 241)                             | (55.9 to 105.4)                                                   | (55 199 to 108 045)        | (73 to 1 480)                           | (14.4 to 10.0)                                                    | (70 102 to 124 080)        | (89 to 160)                             | (29.2 to 165.0)                                                   | (2 875 to 18 267)          | (15 to 241)                             | (55.9 to 105.4)                                                   |
| <b>Slovenia</b>                                         | 6 895                      | 182                                     | 45.1                                                              | 39 828                     | 1 279                                   | 3.9                                                               | 46 724                     | 6.5                                     | 146.1                                                             | 6 895                      | 182                                     | 45.1                                                              |
| <b>Eastern Europe</b>                                   | (6 311 to 14 444)          | (210 to 196)                            | (50.0 to 40.1)                                                    | (28 311 to 48 481)         | (90 to 178)                             | (11.6 to 6.1)                                                     | (35 179 to 61 455)         | (108 to 1 948)                          | (110.0 to 14.4)                                                   | (6 311 to 14 444)          | (210 to 196)                            | (50.0 to 40.1)                                                    |
| <b>Belarus</b>                                          | (5 491 to 17 596 079)      | (20 to 240)                             | (12.6 to 8.3)                                                     | (2 388 110 to 749 579)     | (514 to 1 013)                          | (5.2 to 0.4)                                                      | (1 966 184 to 3 16 952)    | (74 to 245)                             | (6.4 to 2.2)                                                      | (5 491 to 17 596 079)      | (20 to 240)                             | (12.6 to 8.3)                                                     |
| <b>Estonia</b>                                          | 21 617                     | 234                                     | -2.4                                                              | 1 981 984                  | 738                                     | -4.4                                                              | 2 497 071                  | 964                                     | -10.5                                                             | 21 617                     | 234                                     | -2.4                                                              |
| <b>Latvia</b>                                           | (27 689 to 34 297)         | (27 to 293)                             | (21.5 to 1.1)                                                     | (66 861 to 131 733)        | (53 to 104)                             | (7.5 to 2.4)                                                      | (88 278 to 162 801)        | (80 to 131)                             | (9.9 to 3.5)                                                      | (27 689 to 34 297)         | (27 to 293)                             | (21.5 to 1.1)                                                     |
| <b>Lithuania</b>                                        | 2 975                      | 173                                     | -59.3                                                             | 13 355                     | 734                                     | -20.9                                                             | 16 310                     | 907                                     | -37.9                                                             | 2 975                      | 173                                     | -59.3                                                             |
| <b>Lithuania</b>                                        | (2 517 to 4 481)           | (45 to 101)                             | (45.0 to 22.0)                                                    | (15 161 to 21 061)         | (516 to 1 016)                          | (23.1 to 18.5)                                                    | (22 316 to 31 395)         | (66 to 137)                             | (32.4 to 29.9)                                                    | (2 517 to 4 481)           | (45 to 101)                             | (45.0 to 22.0)                                                    |
| <b>Lithuania</b>                                        | 6 029                      | 52.8                                    | 75.2                                                              | 20 854                     | 23.6                                    | 26.883                                                            | 981                        | 33.2                                    | 6 029                                                             | 52.8                       | 75.2                                    |                                                                   |
| <b>Lithuania</b>                                        | (1 100 to 8 893)           | (136 to 262)                            | (48.4 to 45.8)                                                    | (14 724 to 28 890)         | (327 to 1 046)                          | (26.0 to 21.2)                                                    | (20 778 to 34 581)         | (75 to 260)                             | (31.2 to 29.8)                                                    | (1 100 to 8 893)           | (136 to 262)                            | (48.4 to 45.8)                                                    |
| <b>Lithuania</b>                                        | 11 582                     | 218                                     | 31.2                                                              | 31 624                     | 385                                     | 8.5                                                               | 34 924                     | 1 008                                   | 12.7                                                              | 11 582                     | 218                                     | 31.2                                                              |
| <b>Moldova</b>                                          | (10 646 to 12 561)         | (184 to 314)                            | (38.9 to 28.4)                                                    | (23 882 to 46 493)         | (168 to 1 201)                          | (12.7 to 7.8)                                                     | (35 135 to 57 887)         | (85 to 402)                             | (21.3 to 14.4)                                                    | (10 646 to 12 561)         | (184 to 314)                            | (38.9 to 28.4)                                                    |
| <b>Moldova</b>                                          | 749                        | 33                                      | -66.7                                                             | 20 864                     | 366                                     | -30.9                                                             | 23 819                     | 407                                     | -28.6                                                             | 749                        | 33                                      | -66.7                                                             |
| <b>Russian Federation</b>                               | (1 220 to 8 592)           | (159 to 385)                            | (56.4 to 47.8)                                                    | (473 to 912)               | (73 to 170)                             | (12.2 to 17.0)                                                    | (29 724 to 50 146)         | (64 to 101)                             | (33.3 to 26.4)                                                    | (1 220 to 8 592)           | (159 to 385)                            | (56.4 to 47.8)                                                    |
| <b>Russian Federation</b>                               | 1 995 675                  | 229                                     | 1.6                                                               | 1 375 571                  | 1 910                                   | 2.9                                                               | 1 769 246                  | 968                                     | 1.5                                                               | 1 995 675                  | 229                                     | 1.6                                                               |
| <b>Russian Federation</b>                               | (278 231 to 405 484)       | (20 to 265)                             | (1.6 to 24.1)                                                     | (866 500 to 1 066 872)     | (519 to 1 033)                          | (0.2 to 5.1)                                                      | (1 360 261 to 2 07 059)    | (77 to 1 252)                           | (10.7 to 7.1)                                                     | (278 231 to 405 484)       | (20 to 265)                             | (1.6 to 24.1)                                                     |
| <b>Ukraine</b>                                          | 11 893                     | 235                                     | 24.2                                                              | 412 760                    | 705                                     | 13.0                                                              | 534 635                    | 940                                     | 16.1                                                              | 11 893                     | 235                                     | 24.2                                                              |
| <b>Ukraine</b>                                          | (11 249 to 132 443)        | (217 to 256)                            | (30.8 to 16.9)                                                    | (289 234 to 575 717)       | (495 to 739)                            | (15.0 to 10.5)                                                    | (408 488 to 698 091)       | (718 to 1 216)                          | (14.2 to 11.2)                                                    | (11 249 to 132 443)        | (217 to 256)                            | (30.8 to 16.9)                                                    |
| <b>High-income</b>                                      | 1 905 180                  | 86                                      | -840.883                                                          | 3 840 883                  | 273                                     | -8.9                                                              | 5 946 234                  | 479                                     | -13.2                                                             | 1 905 180                  | 86                                      | -840.883                                                          |
| <b>Australia</b>                                        | (1 655 481 to 1 749 551)   | (20 to 257)                             | (28.8 to 24.4)                                                    | (6 153 445 to 9 85 892)    | (272 to 279)                            | (10.2 to 6.9)                                                     | (6 876 493 to 9 58 549)    | (188 to 220)                            | (13.6 to 11.2)                                                    | (1 655 481 to 1 749 551)   | (20 to 257)                             | (28.8 to 24.4)                                                    |
| <b>Australia</b>                                        | (87 201 to 44 017)         | (82 to 17)                              | (4.6 to 14.3)                                                     | (1 843 830 to 323 585)     | (202 to 994)                            | (20.7 to 25.4)                                                    | (2 25 902 to 401 819)      | (540 to 1 081)                          | (25.9 to 23.2)                                                    | (87 201 to 44 017)         | (82 to 17)                              | (4.6 to 14.3)                                                     |
| <b>Australia</b>                                        | 34 091                     | 88                                      | 10.7                                                              | 21 068                     | 483                                     | 24.1                                                              | 24 519                     | 781                                     | 22.6                                                              | 34 091                     | 88                                      | 10.7                                                              |
| <b>Australia</b>                                        | (80 739 to 37 409)         | (14 to 210)                             | (1.8 to 23.0)                                                     | (151 387 to 296 609)       | (488 to 866)                            | (21.7 to 27.0)                                                    | (185 511 to 335 409)       | (102 to 1 051)                          | (10.2 to 3.1)                                                     | (80 739 to 37 409)         | (14 to 210)                             | (1.8 to 23.0)                                                     |
| <b>New Zealand</b>                                      | 6 429                      | 97                                      | -15.0                                                             | 47 484                     | 19.4                                    | 83.913                                                            | 917                        | 14.4                                    | 6 429                                                             | 97                         | -15.0                                   |                                                                   |
| <b>New Zealand</b>                                      | (6 000 to 6 899)           | (91 to 104)                             | (21.1 to 15.1)                                                    | (33 598 to 56 2)           | (80 to 1 142)                           | (14.7 to 24.4)                                                    | (40 844 to 71 798)         | (67 to 1 288)                           | (9.9 to 18.8)                                                     | (6 000 to 6 899)           | (91 to 104)                             | (21.1 to 15.1)                                                    |
| <b>High-income Asia Pacific</b>                         | 1 236 005                  | 74                                      | -42.8                                                             | 3 961 946                  | 481                                     | -14.1                                                             | 5 941 793                  | 594                                     | -10.6                                                             | 1 236 005                  | 74                                      | -42.8                                                             |
| <b>Brunei</b>                                           | (22 969 to 248 489)        | (89 to 78)                              | (46.3 to 38.7)                                                    | (931 659 to 1 779 010)     | (341 to 544)                            | (8.5 to 12.8)                                                     | (1 124 479 to 2 161 435)   | (416 to 729)                            | (5.6 to 1.8)                                                      | (22 969 to 248 489)        | (89 to 78)                              | (46.3 to 38.7)                                                    |
| <b>Brunei</b>                                           | (613 to 824)               | (152 to 196)                            | (28.4 to 2.0)                                                     | (1 370 to 2 707)           | (378 to 653)                            | (3.7 to 2.3)                                                      | (2 076 to 3 631)           | (498 to 815)                            | (11.6 to 7.0)                                                     | (613 to 824)               | (152 to 196)                            | (                                                                 |

| Location                               | YLLs (95% UI)            |                                         |                                                                   | YLDs (95% UI)            |                                         |                                                                   | DALYs (95% UI)            |                                         |                                                                   |
|----------------------------------------|--------------------------|-----------------------------------------|-------------------------------------------------------------------|--------------------------|-----------------------------------------|-------------------------------------------------------------------|---------------------------|-----------------------------------------|-------------------------------------------------------------------|
|                                        | 2017 counts              | 2017 age-standardized rates per 100,000 | Percentage change in age-standardized rates between 1990 and 2017 | 2017 counts              | 2017 age-standardized rates per 100,000 | Percentage change in age-standardized rates between 1990 and 2017 | 2017 counts               | 2017 age-standardized rates per 100,000 | Percentage change in age-standardized rates between 1990 and 2017 |
| United Kingdom                         | 99 475                   | 91                                      | 6.6                                                               | 358 687                  | 286                                     | 16.1                                                              | 458 163                   | 497                                     | 11.1                                                              |
| Latin America and Caribbean            | 831 990                  | 189 to 931                              | (2.2 to 4.4)                                                      | 2 546 001 to 4 055 507   | 206 to 561                              | (14.6 to 17.4)                                                    | 3 378 to 5 093 849        | 357                                     | (2.7 to 12.6)                                                     |
| Andean Latin America                   | 73 666                   | (805 313 to 853 332)                    | (4.0 to 14.8)                                                     | (3 319 to 29.5)          | (893 099 to 1 558 044)                  | (5.1 to 23.3)                                                     | (1 728 233 to 2 486 729)  | (298 to 427)                            | (14.2 to 5.0)                                                     |
| Bolivia                                | 15 971                   | 157                                     | -32.0                                                             | 16 734                   | 171                                     | 3.7                                                               | 32 705                    | 328                                     | -17.1                                                             |
| Ecuador                                | 28 705                   | 179                                     | -24.9                                                             | 29 188                   | 186                                     | 5.5                                                               | 57 893                    | 365                                     | -15.7                                                             |
| Peru                                   | 29 932                   | (25 462 to 32 280)                      | (5.9 to 20.1)                                                     | (33.3 to 15.3)           | (20 843 to 9 978)                       | (13.3 to 25.6)                                                    | (18 905 to 68 161)        | (308 to 431)                            | (12.1 to 9.9)                                                     |
| Caribbean                              | 41                       | 148                                     | 7.3                                                               | 43 024                   | 160                                     | 22.1                                                              | 143 984                   | 294                                     | (18.2 to 14.7)                                                    |
| Antigua and Barbuda                    | 62                       | 45                                      | 1.6                                                               | 135                      | 28.9                                    | 1.7                                                               | 181                       | 22.2                                    | (18.4 to 27.6)                                                    |
| Bahamas                                | 187                      | 45                                      | 2.7                                                               | 543                      | 127                                     | 37.4                                                              | 720                       | 211                                     | (12.1 to 9.9)                                                     |
| Barbados                               | (17 116 to 205)          | (41 to 50)                              | (7.6 to 13.7)                                                     | (86 to 744)              | (97 to 187)                             | (23.5 to 33.6)                                                    | (570 to 932)              | (143 to 233)                            | (15.3 to 26.5)                                                    |
| Belize                                 | (28 to 40)               | (92 to 107)                             | (6.9 to 36.1)                                                     | (36 to 243)              | (51 to 281)                             | (23 to 33.6)                                                      | (139 to 227)              | (162 to 231)                            | (18.4 to 27.6)                                                    |
| Bermuda                                | 54                       | 52                                      | -28.6                                                             | 143                      | 144                                     | 18.7                                                              | 197                       | 197                                     | 0.9                                                               |
| Cuba                                   | (29 529 to 36 385)       | 61                                      | 45.8                                                              | (20 to 55 to 10 057)     | (26 to 246)                             | (14.3 to 21.5)                                                    | (52 440 to 73 158)        | (308 to 434)                            | (15.3 to 17.1)                                                    |
| Dominica                               | (67 to 69)               | (73 to 88)                              | (0.0 to 63.0)                                                     | (84 to 161)              | (101 to 197)                            | (22.7 to 42.3)                                                    | (146 to 233)              | (181 to 274)                            | (84.1 to 47.0)                                                    |
| Dominican Republic                     | (18 291 to 6 184)        | (39 to 62)                              | (4.1 to 10.9)                                                     | (10 400 to 19 876)       | (104 to 199)                            | (15.9 to 29.9)                                                    | (41 922 to 24 537)        | (150 to 246)                            | (13.2 to 16.5)                                                    |
| Grenada                                | 125                      | 90                                      | -10.4                                                             | 208                      | 156                                     | 29.6                                                              | 332                       | 245                                     | (11.4 to 14.4)                                                    |
| Guyana                                 | 1 099                    | 166                                     | 1.9                                                               | 1 140                    | 169                                     | 2.6                                                               | 2 240                     | 335                                     | 10.9                                                              |
| Haiti                                  | (90 to 10 266)           | (44 to 188)                             | (17.4 to 7.3)                                                     | (817 to 1 311)           | (127 to 226)                            | (27.3 to 32.8)                                                    | (1 869 to 2 639)          | (281 to 395)                            | (15.9 to 19.7)                                                    |
| Jamaica                                | 1 549                    | 118                                     | -27.4                                                             | 1 346                    | 150                                     | 24.1                                                              | 2 415                     | 205                                     | (24.5 to 21.2)                                                    |
| Puerto Rico                            | 5 273                    | 96                                      | 0.2                                                               | 9 617                    | 172                                     | 29.9                                                              | 14 890                    | 269                                     | 17.4                                                              |
| Saint Lucia                            | (4 850 to 5 746)         | (89 to 103)                             | (8.9 to 10.3)                                                     | (6 748 to 2 265)         | (121 to 239)                            | (26.3 to 35.6)                                                    | (12 073 to 18 427)        | (272 to 334)                            | (18.1 to 24.4)                                                    |
| Saint Vincent and the Grenadines       | 166                      | 130                                     | 3.2                                                               | 141                      | 141                                     | 26.5                                                              | 406                       | 289                                     | (8.8 to 20.4)                                                     |
| Suriname                               | 599                      | 101                                     | 7.5                                                               | 1 460                    | 260                                     | 30.8                                                              | 1 539                     | 200                                     | 20.0                                                              |
| Trinidad and Tobago                    | 1 492                    | 99                                      | -15.7                                                             | 2 512                    | 181                                     | 25.2                                                              | 4 003                     | 292                                     | (22.0 to 37.4)                                                    |
| Virgin Islands                         | (1 201 to 8 224)         | (80 to 130)                             | (13.1 to 8.7)                                                     | (1 781 to 14 111)        | (109 to 208)                            | (14.0 to 23.1)                                                    | (8 124 to 9 965)          | (202 to 310)                            | (17.5 to 11.3)                                                    |
| Central Latin America                  | (1 216 to 169)           | (84 to 111)                             | (14.2 to 9.3)                                                     | (1 511 to 795)           | (101 to 202)                            | (14.3 to 24.6)                                                    | (793 to 451)              | (197 to 301)                            | (6.2 to 21.0)                                                     |
| Colombia                               | 31 942                   | 127                                     | -45.5                                                             | 43 429                   | 178                                     | 2.4                                                               | 744 415                   | 386                                     | (43.1 to 28.4)                                                    |
| Costa Rica                             | 5 817                    | 118                                     | -23.0                                                             | 6 682                    | 136                                     | 2.5                                                               | 12 499                    | 254                                     | -11.2                                                             |
| El Salvador                            | (6 120 to 8 961)         | (104 to 129)                            | (3.6 to 15.7)                                                     | (6 899 to 10 041)        | (96 to 186)                             | (13.8 to 17.1)                                                    | (10 282 to 18 874)        | (209 to 302)                            | (11.9 to 6.2)                                                     |
| Guatemala                              | 25 385                   | 187                                     | -24.9                                                             | 28 652                   | 142                                     | 1.0                                                               | 59 312                    | 342                                     | (22.9 to 19.8)                                                    |
| Honduras                               | 1 223 to 18 548          | (85 to 211)                             | (42.5 to 25.5)                                                    | (6 920 to 12 289)        | (100 to 191)                            | (4.5 to 6.8)                                                      | (15 969 to 23 191)        | (271 to 391)                            | (22.7 to 16.1)                                                    |
| Mexico                                 | 143                      | 47.2                                    | 3.8                                                               | 272 504                  | 228                                     | 3.8                                                               | 445 752                   | 379                                     | 24.4                                                              |
| Nicaragua                              | (162 720 to 178 651)     | (33 to 148)                             | (51.6 to 45.3)                                                    | (195 339 to 361 744)     | (162 to 202)                            | (6.8 to 10.2)                                                     | (369 990 to 534 652)      | (308 to 440)                            | (29.8 to 19.8)                                                    |
| Panama                                 | 933                      | 103                                     | -21.6                                                             | 1 064                    | 137                                     | 8.2                                                               | 1 939                     | 227                                     | (21.8 to 15.4)                                                    |
| Venezuela                              | 31 692                   | 107                                     | -98.5                                                             | 40 194                   | 138                                     | 8.8                                                               | 71 805                    | 244                                     | -4.8                                                              |
| Tropical Latin America                 | 384 951                  | 170                                     | -23.2                                                             | 633 580                  | 33.2                                    | 1 018 530                                                         | 440                       | 30.8                                    | (2.0 to 6.4)                                                      |
| Brazil                                 | 376 576                  | 111                                     | -23.6                                                             | 459 786                  | 44                                      | 272                                                               | 699 144                   | 274                                     | 44.1                                                              |
| Paraguay                               | (863 240 to 888 881)     | (184 to 177)                            | (27.9 to 20.5)                                                    | (448 970 to 827 987)     | (396 to 363)                            | (28.4 to 39.1)                                                    | (829 821 to 1 200 599)    | (689 to 532)                            | (2.2 to 9.8)                                                      |
| North Africa and Middle East           | 845 178                  | 151                                     | -28.4                                                             | 891 722                  | 164                                     | -11.6                                                             | 1 736 900                 | 315                                     | -21.1                                                             |
| Algeria                                | 155 178                  | (727 622 to 930 199)                    | (30 to 165)                                                       | (441 to 2.6)             | (31 463 to 1 230 846)                   | (117 to 242)                                                      | (1 448 630 to 2 074 624)  | (262 to 376)                            | (28.7 to 17.2)                                                    |
| Bahrain                                | 721                      | 46                                      | 2.8                                                               | 7 483                    | 138                                     | 5.8                                                               | 3 204                     | 206                                     | -14.3                                                             |
| Egypt                                  | 124 914                  | 142                                     | -26.4                                                             | 122 849                  | 149                                     | 1.0                                                               | 247 765                   | 291                                     | -18.7                                                             |
| Iran                                   | (92 504 to 136 122)      | (104 to 180)                            | (41.7 to 1.0)                                                     | (86 980 to 367 786)      | (106 to 203)                            | (4.4 to 5.1)                                                      | (136 727 to 300 405)      | (228 to 354)                            | (29.0 to 4.0)                                                     |
| Iraq                                   | 10 740 to 133 091        | 128                                     | -29.5                                                             | 139 110                  | 168                                     | 7.8                                                               | 235 844                   | 292                                     | (21.6 to 18.8)                                                    |
| Israel                                 | (13 236 to 20 327)       | (35 to 50)                              | (74.7 to 34.3)                                                    | (43 196 to 80 640)       | (221 to 225)                            | (14.0 to 20.8)                                                    | (58 724 to 95 545)        | (161 to 264)                            | (13.9 to 4.0)                                                     |
| Jordan                                 | 7870                     | 79                                      | 43.4                                                              | 12 727                   | 131                                     | 11.5                                                              | 20 597                    | 219                                     | -26.5                                                             |
| Kuwait                                 | 4319                     | 91                                      | -28.8                                                             | 7 644                    | 8.7                                     | 180                                                               | 11 962                    | 271                                     | -16.6                                                             |
| Lebanon                                | 4 896                    | (880 to 820)                            | (37.0 to 20.2)                                                    | (5 399 to 10 630)        | (227 to 249)                            | (13.5 to 5.9)                                                     | (8 667 to 14 896)         | (181 to 337)                            | (20.8 to 19.7)                                                    |
| Libya                                  | (3 889 to 14 365)        | (88 to 178)                             | (64.8 to 4.1)                                                     | (3 114 to 10 034)        | (100 to 209)                            | (9.7 to 0.3)                                                      | (13 314 to 25 833)        | (181 to 341)                            | (10.5 to 4.9)                                                     |
| Morocco                                | 6 104 to 13 107          | (95 to 197)                             | (50.4 to 10.3)                                                    | (12 920 to 4 602)        | (112 to 127)                            | (8.7 to 8.0)                                                      | (24 244 to 26 404)        | (226 to 358)                            | (29.0 to 8.3)                                                     |
| Morocco                                | 46 783                   | 117                                     | -27.0                                                             | 53 585                   | 153                                     | 6.1                                                               | 100 168                   | 280                                     | -14.4                                                             |
| Palestine                              | (5 523 to 6 032)         | (104 to 116)                            | (10.4 to 11.4)                                                    | (88 169 to 13 167)       | (108 to 208)                            | (10.2 to 2.1)                                                     | (79 213 to 123 893)       | (161 to 351)                            | (16.1 to 11.1)                                                    |
| Qatar                                  | 5 606                    | 123                                     | -36.9                                                             | 6 143                    | 139                                     | 1.3                                                               | 11 749                    | 282                                     | -20.8                                                             |
| Oman                                   | (4 770 to 4 059)         | (66 to 100)                             | (51.3 to 7.6)                                                     | (4 386 to 13 354)        | (134 to 217)                            | (3.8 to 14.4)                                                     | (9 238 to 16 630)         | (220 to 350)                            | (13.6 to 7.0)                                                     |
| Saudi Arabia                           | 1 719                    | 237                                     | -24.3                                                             | 60 333                   | 241                                     | 20.1                                                              | 131 255                   | 438                                     | -23.3                                                             |
| Sudan                                  | 62 830                   | 160                                     | -31.7                                                             | 55 604                   | 181                                     | -1.5                                                              | 118 234                   | 317                                     | -18.5                                                             |
| Syria                                  | (45 545 to 85 730)       | (18 to 316)                             | (55.9 to 15.9)                                                    | (40 799 to 37 076)       | (34 to 235)                             | (5.6 to 2.4)                                                      | (92 316 to 148 713)       | (267 to 422)                            | (18.5 to 6.4)                                                     |
| Tunisia                                | 8 353 to 12 594          | 64                                      | -30.2                                                             | 23 825                   | 145                                     | 2.9                                                               | 34 234                    | 209                                     | -20.2                                                             |
| Turkey                                 | 7 350 to 13 270          | (64 to 122)                             | (49.1 to 8.3)                                                     | (12 738 to 4 997)        | (104 to 204)                            | (13.7 to 4.0)                                                     | (23 538 to 36 202)        | (180 to 302)                            | (29.3 to 8.9)                                                     |
| United Arab Emirates                   | 94 737                   | 117                                     | -55.4                                                             | 130 952                  | 151                                     | 31.5                                                              | 235 889                   | 268                                     | -44.5                                                             |
| Yemen                                  | (83 728 to 127 402)      | (102 to 132)                            | (46.4 to 34.5)                                                    | (92 143 to 480)          | (106 to 207)                            | (8.6 to 26.8)                                                     | (184 708 to 278 346)      | (253 to 329)                            | (33.6 to 32.9)                                                    |
| Yemen                                  | 20 552                   | 181                                     | -25.5                                                             | 21 344                   | 197                                     | -26.7                                                             | 41 696                    | 323                                     | -17.0                                                             |
| South Asia                             | 6 234 779                | 436                                     | -12.4                                                             | 2 930 997                | 191                                     | 21.3                                                              | 9 155 776                 | 627                                     | 4.3                                                               |
| Bangladesh                             | (6 091 008 to 6 877 136) | (101 to 482)                            | (24.1 to 8.9)                                                     | (2 112 282 to 879 064)   | (138 to 254)                            | (18.0 to 26.7)                                                    | (8 198 592 to 10 227 260) | (564 to 696)                            | (14.6 to 9.9)                                                     |
| Bhutan                                 | 138                      | 138                                     | 203.5                                                             | 143                      | 21.8                                    | 1.8                                                               | 393 201                   | 217                                     | -11.0                                                             |
| India                                  | 1 686 to 4 737           | (246 to 469)                            | (49.2 to 1.5)                                                     | (1 011 to 8 741)         | (229 to 237)                            | (6.7 to 1.7)                                                      | (3 021 to 5 083)          | (414 to 663)                            | (37.0 to 14.4)                                                    |
| India                                  | 5 614 927                | 13.8                                    | -3.8                                                              | 2 409 399                | 598                                     | 2.8                                                               | 9 000 336                 | 636                                     | 6.1                                                               |
| Nepal                                  | (5 153 572 to 6 300 884) | (460 to 500)                            | (12.0 to 1.4)                                                     | (1 739 948 to 1 395 447) | (144 to 264)                            | (16.7 to 23.0)                                                    | (7 216 848 to 1 148)      | (682 to 775)                            | (16.4 to 4.3)                                                     |
| Nepal                                  | 72 434                   | 311                                     | -24.0                                                             | 38 708                   | 106                                     | 6.6                                                               | 109 142                   | 458                                     | -16.3                                                             |
| Pakistan                               | (2 212 716 to 464 133)   | (38 to 266)                             | (41.8 to 10.8)                                                    | (296 293 to 165 294)     | (106 to 297)                            | (6.6 to 10.4)                                                     | (85 648 to 135 751)       | (364 to 560)                            | (30.8 to 16.3)                                                    |
| Sri Lanka                              | 154 844                  | 207                                     | -24.3                                                             | 274 338                  | 311                                     | 31.7                                                              | 629 182                   | 386                                     | -10.3                                                             |
| Sri Lanka                              | 4 820 931                | 211                                     | -21.5                                                             | 3 126 789                | 123                                     | 12.8                                                              | 9 924 321                 | 334                                     | 3.9                                                               |
| Southeast Asia, East Asia, and Oceania | (8 888 521 to 5 229 627) | (72 to 222)                             | (45.0 to 6.3)                                                     | (2 197 891 to 2 255 206) | (87 to 188)                             | (44.6 to 63.6)                                                    | (6 522 685 to 9 277 614)  | (278 to 387)                            | (25.0 to 17.3)                                                    |
| East Asia                              | 2 502 452 to 3 785 673   | (137 to 237)                            | (49.2 to 27.7)                                                    | (5 188 187 to 1 858 130) | (100 to 209)                            | (80.6 to 77.7)                                                    | (4 841 132 to 7 461 190)  | (287 to 430)                            | (13.0 to 11.2)                                                    |
| China                                  | 3 238 257                | 209                                     | -18.9                                                             | 2 696 044                | 104                                     | 67.6                                                              | 5 934 301                 | 363                                     | 38.6                                                              |
| China                                  | (2 366 240 to 6 228 158) | (137 to 224)                            | (50.1 to 2.3)                                                     | (5 905 183 to 7 038 498) | (109 to 211)                            | (67.1 to 78.5)                                                    | (4 623 848 to 1 121 496)  | (288 to 431)                            | (25.6 to 18.6)                                                    |
| North Korea                            | 56 599                   | 21.0                                    | -81.8                                                             | 31 885                   | 107                                     | 72.6                                                              | 88 824                    | 202                                     | 8.2                                                               |
| Taiwan (Province of China)             | (42 972 to 75 235)       | (83 to 285)                             | (12.8 to 39.0)                                                    | (22 859 to 32 323)       | (76 to 144)                             | (66.6 to 83.1)                                                    | (71 086 to 131 187)       | (261 to 405)                            | (6.9 to 71.6)                                                     |
| Oceania                                | 22 965                   | 213                                     | 6.8                                                               | 8 972                    | 862                                     | 10.9                                                              | 31 077                    | 298                                     | 23.8                                                              |
| American Samoa                         | (15 462 to 10 784)       | (164 to 278)                            | (14.6 to 33.7)                                                    | (6 230 to 13 524)        | (62 to 114)                             | (78.1 to 90.8)                                                    | (23 277 to 39 776)        | (232 to 375)                            | (11.8 to 44.5)                                                    |
| Federated States of Micronesia         | 181 841                  | (101 to 132)                            | (17.1 to 15.0)                                                    | (90 to 37)               | (59 to 123)                             | (45.1 to 38.3)                                                    | (83 to 116)               | (170 to 224)                            | (1.0 to 28.2)                                                     |
| Fiji                                   | (84 to 172)              | (102 to 193)                            | (10.0 to 39.2)                                                    | (54 to 101)              | (59 to 110)                             | (68.3 to 84.1)                                                    | (156 to 257)              | (180 to 287)                            | (8.3 to 50.5)                                                     |
| Guam                                   | 793                      | 91.4                                    | 680                                                               | 89                       | 143                                     | 80                                                                | 143                       | 169                                     | 30.9                                                              |
| Hong Kong                              | (62 918 282)             | (77 to 106)                             | (14.2 to 42.6)                                                    | (488 to 913)             | (64 to 105)                             | (80.3 to 97.7)                                                    | (1 199 to 1 696)          | (143 to 199)                            | (16.2 to 60.2)                                                    |
| Macau                                  | 211                      | 136                                     | 31.8                                                              | 137                      | 89                                      | 78.2                                                              | 370                       | 215                                     | 49.2                                                              |
| Guam                                   | (174 to 244)             | (102 to 144)                            | (6.8 to 21.4)                                                     | (111 to 127)             | (81 to 122)                             | (70.3 to 85.8)                                                    | (209 to 439)              | (179 to 251)                            | (17.9 to 74.4)                                                    |
| Kiribati                               | 70                       | 69                                      | 0.6                                                               | 78                       | 147                                     | 109.0                                                             | 147                       | 147                                     | 38.7                                                              |
| Kiribati                               | (47 to 90)               | (49 to 87)                              | (0.0 to 24.8)                                                     | (57 to 104)              | (57 to 103)                             | (86.5 to 118.4)                                                   | (114 to 181)              | (116 to 179)                            | (21.3 to 56.8)                                                    |

| Location                           | YLLs (95% U)                                        |                                         |                                                                   | YLDs (95% U)                                      |                                         |                                                                   | DALYs (95% U)                                            |                                         |                                                                   |
|------------------------------------|-----------------------------------------------------|-----------------------------------------|-------------------------------------------------------------------|---------------------------------------------------|-----------------------------------------|-------------------------------------------------------------------|----------------------------------------------------------|-----------------------------------------|-------------------------------------------------------------------|
|                                    | 2017 counts                                         | 2017 age-standardized rates per 100,000 | Percentage change in age-standardized rates between 1990 and 2017 | 2017 counts                                       | 2017 age-standardized rates per 100,000 | Percentage change in age-standardized rates between 1990 and 2017 | 2017 counts                                              | 2017 age-standardized rates per 100,000 | Percentage change in age-standardized rates between 1990 and 2017 |
| Marshall Islands                   | 80<br>(58 to 106)                                   | 178<br>(133 to 229)                     | 14.4<br>(-15.6 to 48.5)                                           | 39<br>(28 to 52)                                  | 81<br>(58 to 109)                       | 87.1<br>(78.2 to 95.2)                                            | 119<br>(93 to 149)                                       | 259<br>(205 to 320)                     | 80.3<br>(7.8 to 56.8)                                             |
| Northern Mariana Islands           | 48<br>(39 to 56)                                    | 107<br>(87 to 123)                      | 5.8<br>(-28.0 to 31.0)                                            | 44<br>(29 to 58)                                  | 90<br>(56 to 127)                       | 45.8<br>(39.4 to 51.7)                                            | 96<br>(74 to 108)                                        | 207<br>(156 to 223)                     | 23.3<br>(7.6 to 36.3)                                             |
| Papua New Guinea                   | 255<br>(805 to 222 111)                             | 157<br>(130 to 179)                     | 15.5<br>(-21.1 to 48.9)                                           | 255<br>(4203 to 7 786)                            | 255<br>(85 to 107)                      | 790<br>(87.6 to 103.7)                                            | 2092<br>(14158 to 28 642)                                | 255<br>(192 to 363)                     | 58.9<br>(5.5 to 58.9)                                             |
| Samoa                              | 189<br>(136 to 248)                                 | 117<br>(85 to 152)                      | 6.3<br>(-23.0 to 40.3)                                            | 145<br>(104 to 195)                               | 88<br>(62 to 118)                       | 195<br>(172 to 218)                                               | 334<br>(207 to 461)                                      | 204<br>(100 to 308)                     | 29.1<br>(0.9 to 51.5)                                             |
| Solomon Islands                    | 4077<br>(3 284 to 4 903)                            | 833<br>(80 to 973)                      | -15.8<br>(-33.8 to 6.2)                                           | 75<br>(55 to 1 003)                               | 162<br>(117 to 213)                     | 34.4<br>(31.1 to 37.7)                                            | 486<br>(403 to 563)                                      | 204<br>(84 to 111)                      | 10.3<br>(-27.4 to 7.7)                                            |
| Tonga                              | 82<br>(70 to 96)                                    | 158<br>(80 to 110)                      | 17.5<br>(-22.1 to 21.2)                                           | 118<br>(64 to 102)                                | 111<br>(59 to 111)                      | 91.4<br>(68.7 to 85.3)                                            | 187<br>(132 to 187)                                      | 250<br>(149 to 209)                     | 40.6<br>(6.3 to 40.6)                                             |
| Vanuatu                            | 366<br>(235 to 523)                                 | 158<br>(71 to 219)                      | 17.5<br>(-21.7 to 10.7)                                           | 219<br>(159 to 304)                               | 70<br>(70 to 79)                        | 30.9<br>(83 to 308.2)                                             | 366<br>(440 to 760)                                      | 250<br>(195 to 323)                     | 40.6<br>(7.7 to 74.0)                                             |
| <b>Southeast Asia</b>              | <b>1 400 902</b><br><b>(1 309 922 to 1 562 321)</b> | <b>232</b><br><b>(172 to 293)</b>       | <b>-29.9</b><br><b>(-39.2 to -14.9)</b>                           | <b>287 499</b><br><b>(208 176 to 385 489)</b>     | <b>45</b><br><b>(32 to 60)</b>          | <b>1.8</b><br><b>(2.4 to 6.2)</b>                                 | <b>1 688 594</b><br><b>(1 565 442 to 1 866 980)</b>      | <b>277</b><br><b>(207 to 392)</b>       | <b>-26.2</b><br><b>(-39.0 to -12.6)</b>                           |
| Cambodia                           | 50 273<br>(42 496 to 60 195)                        | 183<br>(150 to 215)                     | -15.7<br>(-30.0 to -1.7)                                          | 257<br>(6 021 to 11 051)                          | 40<br>(44 to 80)                        | 36.0<br>(31.2 to 40.8)                                            | 58 229<br>(50 520 to 68 410)                             | 433<br>(386 to 512)                     | -11.1<br>(-29.5 to 14.0)                                          |
| Indonesia                          | 509 815<br>(471 215 to 582 918)                     | 259<br>(197 to 329)                     | -25.9<br>(-51.5 to -26.8)                                         | 700<br>(63 999 to 114 956)                        | 26<br>(26 to 47)                        | 44.2<br>(35.4 to 31.3)                                            | 595 318<br>(547 572 to 668 297)                          | 258<br>(248 to 295)                     | -4.8<br>(-49.6 to -27.9)                                          |
| Laos                               | 15 697<br>(10 729 to 18 642)                        | 239<br>(137 to 320)                     | 12.2<br>(-43.4 to 27.9)                                           | 292<br>(178 to 400)                               | 39<br>(38 to 89)                        | 30.9<br>(44.7 to 56.8)                                            | 18 600<br>(13 602 to 21 769)                             | 231<br>(242 to 374)                     | 31.1<br>(36.5 to 30.9)                                            |
| Malaysia                           | 21 467<br>(16 855 to 25 363)                        | 79<br>(62 to 92)                        | -24.4<br>(-50.0 to 0.0)                                           | 12 333<br>(8 789 to 19 933)                       | 12<br>(30 to 77)                        | 43.9<br>(34.8 to 52.6)                                            | 33 800<br>(28 136 to 39 558)                             | 121<br>(107 to 140)                     | 9.5<br>(-24.0 to 11.8)                                            |
| Maldives                           | 450<br>(349 to 520)                                 | 111<br>(87 to 124)                      | -11.1<br>(-47.5 to -16.0)                                         | 500<br>(286 to 249)                               | 43<br>(30 to 59)                        | 7.4<br>(0.1 to 14.9)                                              | 550<br>(505 to 706)                                      | 151<br>(134 to 176)                     | -43.2<br>(-69.5 to -10.8)                                         |
| Mauritius                          | 2 039<br>(1 825 to 2 256)                           | 209<br>(152 to 256)                     | -28.6<br>(-53.0 to -44.4)                                         | 700<br>(466 to 961)                               | 700<br>(32 to 63)                       | 7.0<br>(7.1 to 50.6)                                              | 2 729<br>(2 450 to 3 050)                                | 185<br>(166 to 206)                     | -15.6<br>(-39.6 to -44.7)                                         |
| Myanmar                            | 43<br>(10 624 to 608)                               | 43<br>(162 to 499)                      | -42.4<br>(-44.4 to 4.1)                                           | 43<br>(22 237 to 40 838)                          | 43<br>(44 to 31)                        | 4.4<br>(2.3 to 32.4)                                              | 43<br>(201 132 to 256 562)                               | 43<br>(43 to 56)                        | 40.1<br>(39.7 to 67.1)                                            |
| Philippines                        | 1 381 211<br>(1 213 328 to 1 523 881)               | 155<br>(137 to 171)                     | -44.4<br>(-58.1 to -31.9)                                         | 38 923<br>(28 269 to 50 029)                      | 41<br>(29 to 57)                        | 67.4<br>(59.2 to 75.4)                                            | 1 751 311<br>(1 562 260 to 1 982 222)                    | 156<br>(175 to 141)                     | -48.7<br>(-116.4 to 20.0)                                         |
| Sri Lanka                          | 52 358<br>(41 342 to 64 750)                        | 231<br>(184 to 283)                     | -36.4<br>(-58.0 to -12.9)                                         | 11 713<br>(9 249 to 16 129)                       | 29<br>(19 to 68)                        | 27.1<br>(20.0 to 33.8)                                            | 64 069<br>(52 643 to 77 381)                             | 232<br>(232 to 317)                     | -11.0<br>(-30.8 to 7.7)                                           |
| Seychelles                         | 191<br>(157 to 219)                                 | 191<br>(145 to 200)                     | 7.8<br>(-25.8 to 9.3)                                             | 191<br>(93 to 26)                                 | 191<br>(35 to 108)                      | 2.8<br>(0.0 to 44.0)                                              | 245<br>(208 to 279)                                      | 245<br>(191 to 254)                     | 11.5<br>(-17.0 to 40.6)                                           |
| Thailand                           | 100 980<br>(85 240 to 122 175)                      | 113<br>(100 to 122)                     | -12.3<br>(-54.3 to 14.2)                                          | 113<br>(77 218 to 164 266)                        | 113<br>(31 to 51)                       | 4.2<br>(7.1 to 21.0)                                              | 144 339<br>(120 699 to 166 601)                          | 113<br>(141 to 193)                     | -1.5<br>(-43.3 to 40.3)                                           |
| Timor-Leste                        | 2 166<br>(1 402 to 2 909)                           | 205<br>(140 to 297)                     | -3.1<br>(-37.2 to 37.5)                                           | 499<br>(363 to 671)                               | 50<br>(37 to 67)                        | 56.7<br>(49.2 to 64.2)                                            | 2 666<br>(1 806 to 3 206)                                | 256<br>(180 to 307)                     | -3.9<br>(-28.3 to 20.5)                                           |
| Vietnam                            | 299 251<br>(254 572 to 352 194)                     | 327<br>(282 to 381)                     | -8.2<br>(-27.1 to 10.9)                                           | 57 685<br>(40 942 to 78 882)                      | 37<br>(42 to 81)                        | 32.1<br>(24.9 to 39.5)                                            | 356 935<br>(308 271 to 412 763)                          | 327<br>(338 to 445)                     | -3.7<br>(-33.3 to 25.9)                                           |
| <b>Sub-Saharan Africa</b>          | <b>1 283 900</b><br><b>(1 143 167 to 1 528 381)</b> | <b>189</b><br><b>(139 to 239)</b>       | <b>-49.0</b><br><b>(-69.2 to -28.4)</b>                           | <b>1 283 900</b><br><b>(893 400 to 1 641 170)</b> | <b>189</b><br><b>(134 to 245)</b>       | <b>-5.0</b><br><b>(4.3 to -1.1)</b>                               | <b>1 528 381</b><br><b>(1 234 544 to 1 937 994)</b>      | <b>241</b><br><b>(136 to 436)</b>       | <b>-33.4</b><br><b>(-48.4 to -18.4)</b>                           |
| <b>Central sub-Saharan Africa</b>  | <b>99 455 to 208 538</b>                            | <b>139 699</b><br><b>(139 to 239)</b>   | <b>-30.7 to 22.4</b><br><b>(-40.7 to 10.9)</b>                    | <b>129 390</b><br><b>(139 to 239)</b>             | <b>129 390</b><br><b>(121 to 222)</b>   | <b>3.5</b><br><b>(1.3 to 5.5)</b>                                 | <b>208 538 to 399 855</b><br><b>(208 538 to 399 855)</b> | <b>326</b><br><b>(276 to 404)</b>       | <b>-6.8</b><br><b>(-17.4 to 4.8)</b>                              |
| Angola                             | 34 760<br>(26 802 to 50 985)                        | 189<br>(130 to 261)                     | -23.9<br>(-46.4 to 19.0)                                          | 29 496<br>(21 810 to 38 607)                      | 189<br>(134 to 255)                     | -3.8<br>(4.6 to 1.5)                                              | 42 556<br>(31 802 to 55 021)                             | 326<br>(301 to 450)                     | -15.1<br>(-31.2 to 10.6)                                          |
| Central African Republic           | 6 186<br>(4 745 to 12 051)                          | 361<br>(311 to 361)                     | 11.6<br>(-11.7 to 36.1)                                           | 619<br>(311 to 208)                               | 361<br>(182 to 208)                     | 11.1<br>(8.0 to 14.3)                                             | 11 109<br>(9 580 to 17 407)                              | 361<br>(350 to 475)                     | 5.4<br>(-14.1 to 21.6)                                            |
| Congo (Brazzaville)                | 8 834<br>(8 836 to 0 027)                           | 131<br>(12 to 263)                      | -22.7<br>(-43.2 to 6.6)                                           | 131<br>(632 to 7 956)                             | 131<br>(221 to 228)                     | -2.2<br>(5.0 to 6.6)                                              | 131<br>(0 011 to 15 279)                                 | 131<br>(264 to 439)                     | -1.0<br>(-27.2 to 25.2)                                           |
| DR Congo                           | 82 345<br>(54 823 to 138 278)                       | 261<br>(109 to 211)                     | -11.4<br>(-30.0 to 17.3)                                          | 114<br>(30 to 131 188)                            | 261<br>(131 to 313)                     | 17.4<br>(13.1 to 21.9)                                            | 166 318<br>(128 200 to 224 729)                          | 309<br>(328 to 388)                     | -12.9<br>(-47.0 to 21.2)                                          |
| Equatorial Guinea                  | 1 196<br>(702 to 0 011)                             | 106<br>(93 to 128)                      | -3.9<br>(-62.3 to 18.6)                                           | 1 264<br>(910 to 1 705)                           | 106<br>(109 to 223)                     | 1.6<br>(1.4 to 1.9)                                               | 2 460<br>(1 842 to 2 253)                                | 316<br>(272 to 410)                     | -15.3<br>(-39.3 to 11.6)                                          |
| Gabon                              | 2 158<br>(1 550 to 3 450)                           | 215<br>(130 to 257)                     | -12.1<br>(-43.4 to 0.6)                                           | 215<br>(729 to 2 201)                             | 215<br>(135 to 247)                     | -3.9<br>(-15.6 to 10.9)                                           | 4 992<br>(3 607 to 5 872)                                | 356<br>(283 to 466)                     | -27.0<br>(-39.0 to -2.1)                                          |
| <b>Eastern sub-Saharan Africa</b>  | <b>544 844</b><br><b>(479 936 to 600 996)</b>       | <b>237</b><br><b>(206 to 251)</b>       | <b>-20.6</b><br><b>(-33.7 to -6.6)</b>                            | <b>544 844</b><br><b>(426 189 to 727 264)</b>     | <b>237</b><br><b>(176 to 319)</b>       | <b>-6.6</b><br><b>(4.8 to 2.1)</b>                                | <b>600 996</b><br><b>(539 862 to 732 942)</b>            | <b>241</b><br><b>(198 to 552)</b>       | <b>-10.2</b><br><b>(-19.1 to 0.9)</b>                             |
| Burundi                            | 13 690<br>(10 632 to 17 492)                        | 225<br>(140 to 21)                      | -30.2<br>(-48.0 to -1.1)                                          | 15 009<br>(10 788 to 19 921)                      | 225<br>(162 to 294)                     | -7.3<br>(9.0 to 4.8)                                              | 28 699<br>(23 307 to 34 895)                             | 447<br>(364 to 538)                     | -20.4<br>(-34.0 to -8.9)                                          |
| Comoros                            | 920<br>(712 to 1 225)                               | 177<br>(142 to 234)                     | -27.3<br>(-41.9 to -2.2)                                          | 1 330<br>(866 to 1 760)                           | 177<br>(170 to 311)                     | 2.3<br>(-11.2 to 6.5)                                             | 230<br>(181 to 244)                                      | 230<br>(316 to 495)                     | -17.8<br>(-26.0 to -8.8)                                          |
| Djibouti                           | 1 100<br>(928 to 1 941)                             | 107<br>(85 to 263)                      | -11.4<br>(-43.9 to 4.4)                                           | 1 094<br>(632 to 1 657)                           | 107<br>(176 to 322)                     | -0.1<br>(-12.6 to 7.6)                                            | 314<br>(261 to 204)                                      | 314<br>(340 to 531)                     | -1.9<br>(-27.1 to 20.2)                                           |
| Eritrea                            | 7 993<br>(5 855 to 11 123)                          | 237<br>(171 to 311)                     | -18.4<br>(-40.3 to 16.6)                                          | 7 993<br>(6 159 to 11 596)                        | 237<br>(309 to 307)                     | -6.3<br>(-2.5 to 2.2)                                             | 16 765<br>(13 323 to 20 375)                             | 463<br>(370 to 560)                     | -10.7<br>(-24.8 to 10.5)                                          |
| Ethiopia                           | 144 032<br>(120 363 to 169 974)                     | 238<br>(180 to 276)                     | -31.1<br>(-51.0 to 5.1)                                           | 139 331<br>(101 788 to 185 984)                   | 238<br>(166 to 303)                     | -2.8<br>(-6.9 to 9.3)                                             | 283 360<br>(232 565 to 337 663)                          | 466<br>(388 to 551)                     | -21.7<br>(-34.0 to -9.4)                                          |
| Kenya                              | 63 203<br>(52 212 to 76 541)                        | 230<br>(205 to 270)                     | -7.2<br>(-34.4 to 15.3)                                           | 96 950<br>(70 610 to 128 483)                     | 230<br>(219 to 392)                     | 8.5<br>(6.1 to 10.8)                                              | 160 153<br>(132 600 to 193 453)                          | 528<br>(440 to 630)                     | -10.4<br>(-31.0 to 11.6)                                          |
| Madagascar                         | 25 864<br>(19 626 to 34 321)                        | 166<br>(139 to 215)                     | -29.8<br>(-43.5 to -8.6)                                          | 368<br>(277 879 to 439)                           | 166<br>(166 to 305)                     | -5.2<br>(8.0 to 2.8)                                              | 547<br>(583 to 79 093)                                   | 396<br>(317 to 480)                     | -25.9<br>(-35.1 to -2.7)                                          |
| Malawi                             | 27 399<br>(23 145 to 33 643)                        | 233<br>(115 to 298)                     | -13.8<br>(-34.3 to 47.8)                                          | 233<br>(164 to 32 946)                            | 233<br>(161 to 294)                     | -2.8<br>(-3.6 to 1.8)                                             | 434<br>(404 to 621 216)                                  | 434<br>(402 to 556)                     | -15.6<br>(-21.9 to 10.2)                                          |
| Mozambique                         | 53 734<br>(37 530 to 64 915)                        | 305<br>(236 to 300)                     | 8.0<br>(-26.6 to 11.4)                                            | 41 339<br>(29 632 to 8 899)                       | 305<br>(277 to 314)                     | 1.9<br>(-4.1 to 10.7)                                             | 542<br>(423 to 113 460)                                  | 542<br>(633 to 653)                     | -2.9<br>(-17.5 to 8.4)                                            |
| Rwanda                             | 15 256<br>(11 881 to 20 085)                        | 200<br>(160 to 255)                     | -36.8<br>(-53.5 to -7.7)                                          | 18 739<br>(13 624 to 23 032)                      | 200<br>(163 to 298)                     | -9.9<br>(-12.1 to 7.8)                                            | 424<br>(272 164 to 41 451)                               | 424<br>(530 to 510)                     | -24.9<br>(-36.1 to -8.5)                                          |
| Somalia                            | 186 610<br>(127 456 to 267 946)                     | 193<br>(142 to 263)                     | -24.0<br>(-39.1 to 10.4)                                          | 24 328<br>(17 775 to 31 959)                      | 193<br>(200 to 208)                     | 9.2<br>(6.0 to 11.4)                                              | 427<br>(370 to 53 297)                                   | 427<br>(335 to 525)                     | -1.9<br>(-18.4 to 21.5)                                           |
| South Sudan                        | 20 896<br>(9 337 to 17 194)                         | 237<br>(154 to 278)                     | -20.6<br>(-44.4 to 42.2)                                          | 20 896<br>(10 530 to 19 244)                      | 237<br>(276 to 319)                     | 8.6<br>(0.9 to 5.7)                                               | 21 690<br>(21 626 to 33 147)                             | 241<br>(356 to 548)                     | -17.0<br>(-38.8 to 11.5)                                          |
| Tanzania                           | 86 274<br>(77 835 to 109 749)                       | 227<br>(187 to 267)                     | -12.0<br>(-31.0 to 3.3)                                           | 83 589<br>(60 134 to 113 655)                     | 227<br>(176 to 322)                     | 0.2<br>(-2.3 to 2.2)                                              | 169 842<br>(141 550 to 203 729)                          | 470<br>(395 to 555)                     | -11.8<br>(-16.6 to -8.0)                                          |
| Uganda                             | 36 951<br>(27 835 to 47 700)                        | 169<br>(130 to 210)                     | -12.7<br>(-35.9 to 17.1)                                          | 51 097<br>(37 014 to 68 263)                      | 169<br>(162 to 296)                     | 17.5<br>(14.7 to 20.5)                                            | 88 048<br>(70 556 to 107 418)                            | 393<br>(317 to 476)                     | -2.3<br>(-14.1 to 17.5)                                           |
| Zambia                             | 27 600<br>(23 300 to 32 623)                        | 274<br>(236 to 316)                     | -21.3<br>(-38.7 to 7.4)                                           | 274<br>(191 371 to 499)                           | 274<br>(187 to 314)                     | -1.3<br>(-5.8 to 1.4)                                             | 325<br>(448 314 to 67 373)                               | 325<br>(466 to 609)                     | -2.5<br>(-25.1 to 2.1)                                            |
| <b>Southern sub-Saharan Africa</b> | <b>46 482</b><br><b>(37 637 to 46 623)</b>          | <b>199</b><br><b>(163 to 233)</b>       | <b>-23.2</b><br><b>(-33.3 to -13.1)</b>                           | <b>46 482</b><br><b>(35 107 to 106 673)</b>       | <b>199</b><br><b>(140 to 157)</b>       | <b>-10.2</b><br><b>(0.1 to 4.9)</b>                               | <b>106 673</b><br><b>(97 464 to 148 485)</b>             | <b>241</b><br><b>(150 to 224)</b>       | <b>-18.1</b><br><b>(-34.6 to -1.6)</b>                            |
| Botswana                           | 1 139<br>(822 to 1 536)                             | 71<br>(56 to 77)                        | -26.8<br>(-46.8 to -7.7)                                          | 2 140<br>(1 239 to 3 914)                         | 71<br>(82 to 155)                       | -4.6<br>(-8.2 to 1.2)                                             | 3 269<br>(2 507 to 4 124)                                | 185<br>(166 to 238)                     | -14.5<br>(-21.0 to -6.6)                                          |
| Lesotho                            | 1 586<br>(1 157 to 2 072)                           | 114<br>(84 to 146)                      | -1.8<br>(-16.6 to 48.9)                                           | 1 831<br>(1 325 to 2 454)                         | 114<br>(84 to 156)                      | 7.6<br>(4.5 to 10.6)                                              | 3 429<br>(2 691 to 4 441)                                | 52<br>(183 to 279)                      | 5.2<br>(-27.2 to 26.9)                                            |
| Namibia                            | 1 464<br>(1 163 to 1 805)                           | 87<br>(73 to 107)                       | -21.6<br>(-37.8 to 0.4)                                           | 2 182<br>(1 578 to 2 955)                         | 87<br>(86 to 160)                       | -7.2<br>(-1.0 to 3.9)                                             | 3 956<br>(2 904 to 4 441)                                | 206<br>(167 to 248)                     | -2.6<br>(-22.4 to 14.1)                                           |
| South Africa                       | 36 615<br>(22 281 to 29 949)                        | 54<br>(47 to 62)                        | -24.6<br>(-35.8 to 11.6)                                          | 57 918<br>(41 363 to 78 786)                      | 54<br>(82 to 154)                       | 1.1<br>(-1.9 to 4.1)                                              | 83 934<br>(66 336 to 105 098)                            | 186<br>(133 to 210)                     | -4.5<br>(-16.2 to 1.2)                                            |
| Swaziland                          | 723<br>(516 to 961)                                 | 99<br>(75 to 127)                       | -13.3<br>(-31.0 to 6.6)                                           | 951<br>(683 to 1 284)                             | 99<br>(84 to 156)                       | -2.1<br>(-5.4 to 9.9)                                             | 1 674<br>(1 317 to 2 041)                                | 214<br>(172 to 258)                     | -7.7<br>(-22.1 to 10.7)                                           |
| Zimbabwe                           | 10 723<br>(7 873 to 13 723)                         | 133<br>(93 to 160)                      | -13.3<br>(-29.9 to 47.6)                                          | 13 591<br>(9 533 to 18 302)                       | 133<br>(96 to 177)                      | 13.0<br>(10.1 to 16.2)                                            | 24 314<br>(19 417 to 29 220)                             | 258<br>(207 to 306)                     | -11.1<br>(-36.1 to 28.7)                                          |
| <b>Western sub-Saharan Africa</b>  | <b>294 776</b><br><b>(486 326 to 733 838)</b>       | <b>199</b><br><b>(167 to 245)</b>       | <b>-20.1</b>                                                      |                                                   |                                         |                                                                   |                                                          |                                         |                                                                   |
